# Supplementary material
Source: PubMed Central journal article supplement (PMC6792379)
Supplement: ehp-127-077006-s001.pdf [file ehp-127-077006-s001.pdf]

**Note to readers with disabilities:** *EHP* strives to ensure that all journal content is accessible to all readers. However, some figures and Supplemental Material published in *EHP* articles may not conform to [508 standards](#) due to the complexity of the information being presented. If you need assistance accessing journal content, please contact [ehp508@niehs.nih.gov](mailto:ehp508@niehs.nih.gov). Our staff will work with you to assess and meet your accessibility needs within 3 working days.

## **Supplemental Material**

### **Modeling Future Projections of Temperature-Related Excess Morbidity due to Infectious Gastroenteritis under Climate Change Conditions in Japan**

Daisuke Onozuka, Antonio Gasparri, Francesco Sera, Masahiro Hashizume, and Yasushi Honda

#### **Table of Contents**

**Figure S1.** The geographic distribution of the 47 Japanese prefectures and climate stations. The colors indicate the ranges in weekly average temperature across the study period.

**Figure S2.** Decadal temperature differences in Japan by scenario. The graph indicates the difference in average projected increase in temperature (°C, GCM-ensemble average) by decade and climate change scenario compared to the present period (2010–2019). Temperatures after the present period are projections, while temperatures prior to the present period were observed. The vertical lines to the right of each graph represent the range of the increase from the present period. GCM=general circulation model; RCP=representative concentration pathway.

**Figure S3.** Decadal temperature differences by prefecture and scenario. The graphs indicate the differences in prefecture-specific average projected increase in temperature (°C, GCM-ensemble average) by decade and climate change scenario compared to the present period (2010–2019). Temperatures after the present period are projections, while temperatures prior to the present period were observed. The vertical lines to the right of each graph represent the range of the increase from the present period. GCM=general circulation model; RCP=representative concentration pathway.

**Figure S4.** Map of prefecture-specific projected changes in temperature (°C, GCM-ensemble average) in 2090–2099 compared to 2010–2019 under RCP8.5 scenario in the 47 Japanese prefectures. GCM=general circulation model; RCP=representative concentration pathway.

**Figure S5.** Overall cumulative exposure-response associations between the relative risks (95% CI) of diarrhea and temperatures in the 47 Japanese prefectures. Exposure-response associations are expressed as the best linear unbiased prediction (with 95% eCI, shaded grey) with the related temperature distributions. Vertical lines represent the percentile of minimum morbidity temperature (dotted) and the 2.5th and 97.5th percentiles of the temperature distribution (dashed).

**Figure S6.** Map of prefecture-specific projected changes in heat-related, cold-related, and net excess morbidity (%) in diarrhea in 2090–2099 compared to 2010–2019 under RCP8.5 scenario in the 47 Japanese prefectures. RCP=representative concentration pathway.

**Figure S7.** Trends in heat-related and cold-related excess morbidity in diarrhea by prefecture. RCP=representative concentration pathway.

**Figure S8.** Temporal change in excess morbidity in diarrhea by prefecture. RCP=representative concentration pathway.

**Figure S9.** Sensitivity analysis by using uniform daily outcome counts within each week: Overall cumulative exposure-response associations between the relative risks (95% eCI) of diarrhea and temperatures in the 47 Japanese prefectures. Exposure-response associations are expressed as the best linear unbiased prediction (with 95% eCI, shaded grey) with the related temperature distributions. Vertical lines represent the percentile of minimum morbidity temperature (dotted) and the 2.5th and 97.5th percentiles of the temperature distribution (dashed).

**Table S1.** Descriptive statistics by prefecture.

**Table S2.** Heat-related, cold-related, and net change in excess morbidity in diarrhea (%) with 95% eCI by prefecture and period under the RCP2.6 scenario. Heat-related and cold-related morbidity were estimated using a two-stage time series regression model with quasi-Poisson family (Gasparrini et al. 2017; Vicedo-Cabrera et al. 2019). Estimates are presented as GCM-ensemble average decadal fractions. GCM=general circulation model; RCP=representative concentration pathway.

**Table S3.** Heat-related, cold-related, and net change in excess morbidity in diarrhea (%) with 95% eCI by prefecture and period under the RCP4.5 scenario. Heat-related and cold-related morbidity were estimated using a two-stage time series regression model with quasi-Poisson family (Gasparrini et al. 2017; Vicedo-Cabrera et al. 2019). Estimates are presented as GCM-ensemble average decadal fractions. GCM=general circulation model; RCP=representative concentration pathway.

**Table S4.** Heat-related, cold-related, and net change in excess morbidity in diarrhea (%) with 95% eCI by prefecture and period under the RCP6.0 scenario. Heat-related and cold-related morbidity were estimated using a two-stage time series regression model with quasi-Poisson family (Gasparrini et al. 2017; Vicedo-Cabrera et al. 2019). Estimates are presented as GCM-ensemble average decadal fractions. RCP=representative concentration pathway; GCM=general circulation model.

**Table S5.** Heat-related, cold-related, and net change in excess morbidity in diarrhea (%) with 95% eCI by prefecture and period under the RCP8.5 scenario. Heat-related and cold-related morbidity were estimated using a two-stage time series regression model with quasi-Poisson family (Gasparrini et al. 2017; Vicedo-Cabrera et al. 2019). Estimates are presented as GCM-ensemble average decadal fractions. GCM=general circulation model; RCP=representative concentration pathway.

**Table S6.** Prefecture-specific attributable fractions (95% eCI) for infectious gastroenteritis in 2010–2019. Attributable fractions were computed as total and as separate components for cold and heat.

**Table S7.** Sensitivity analysis using exposure-response curves calculated with uniform daily outcome counts within each week: Prefecture-specific attributable fractions (95% eCI) for infectious gastroenteritis in 2010–2019. Attributable fractions were computed as total and as separate components for cold and heat.

**Table S8.** Sensitivity analysis with exposure-response curves calculated using weekly data, and a) calibrating the projected time series of daily mean temperature using the observed distribution of daily mean temperature, and b) projecting the time series of daily outcome using uniform distribution of events within a week: Prefecture-specific attributable fractions (95% eCI) for infectious gastroenteritis in 2010–2019. Attributable fractions were computed as total and as separate components for cold and heat.

**Table S9.** Sensitivity analysis using exposure-response curves calculated with uniform daily outcome counts within each week: Heat-related, cold-related, and net excess morbidity in diarrhea (%) with 95% empirical confidence interval (eCI) by period under four climate change scenarios (RCP2.6, RCP4.5, RCP6.0, and RCP8.5) in Japan. Heat-related and cold-related morbidity were estimated using a two-stage time series regression model with quasi-Poisson family (Gasparrini et al. 2017). Estimates are presented as GCM-ensemble average decadal fractions. GCM=general circulation model; RCP=representative concentration pathway.

**Table S10.** Sensitivity analysis with exposure-response curves calculated using weekly data, and a) calibrating the projected time series of daily mean temperature using the observed distribution of daily mean temperature, and b) projecting the time series of daily outcome using uniform distribution of events within a week: Heat-related, cold-related, and net excess morbidity in diarrhea (%) with 95% empirical confidence interval (eCI) by period under four climate change scenarios (RCP2.6, RCP4.5, RCP6.0, and RCP8.5) in Japan. Heat-related and cold-related morbidity were estimated using a two-stage time series regression model with quasi-Poisson family (Gasparrini et al. 2017). Estimates are presented as GCM-ensemble average decadal fractions. GCM=general circulation model; RCP=representative concentration pathway.

## References

**Figure S1.** The geographic distribution of the 47 Japanese prefectures and climate stations.

The colors indicate the ranges in weekly average temperature across the study period.

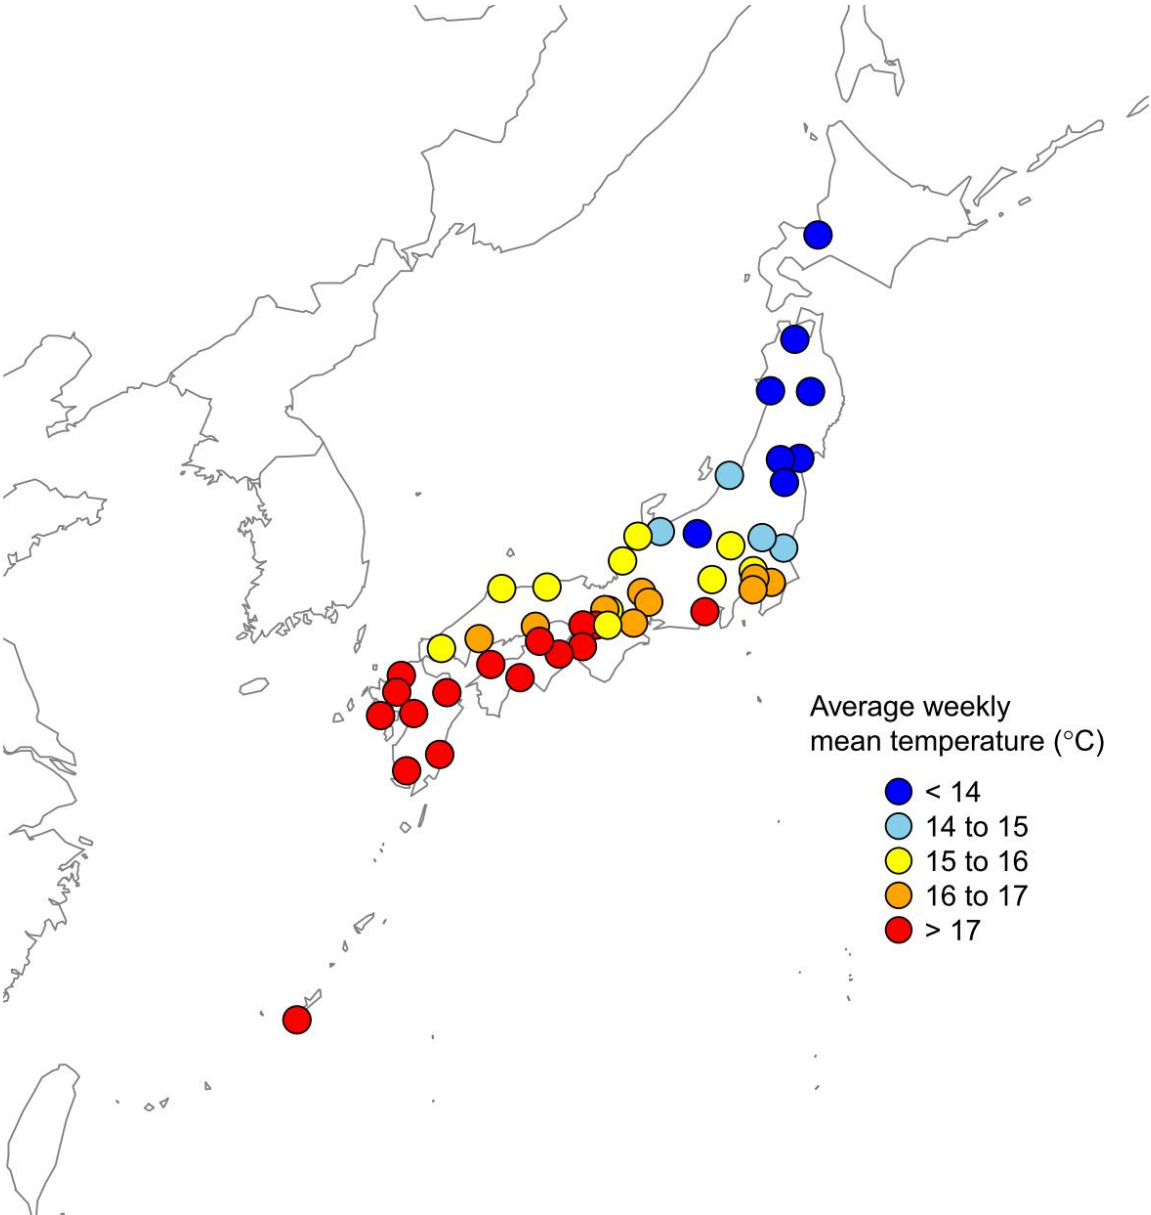

**Figure S2.** Decadal temperature differences in Japan by scenario. The graph indicates the difference in average projected increase in temperature (°C, GCM-ensemble average) by decade and climate change scenario compared to the present period (2010–2019).

Temperatures after the present period are projections, while temperatures prior to the present period were observed. The vertical lines to the right of each graph represent the range of the increase from the present period. GCM=general circulation model; RCP=representative concentration pathway.

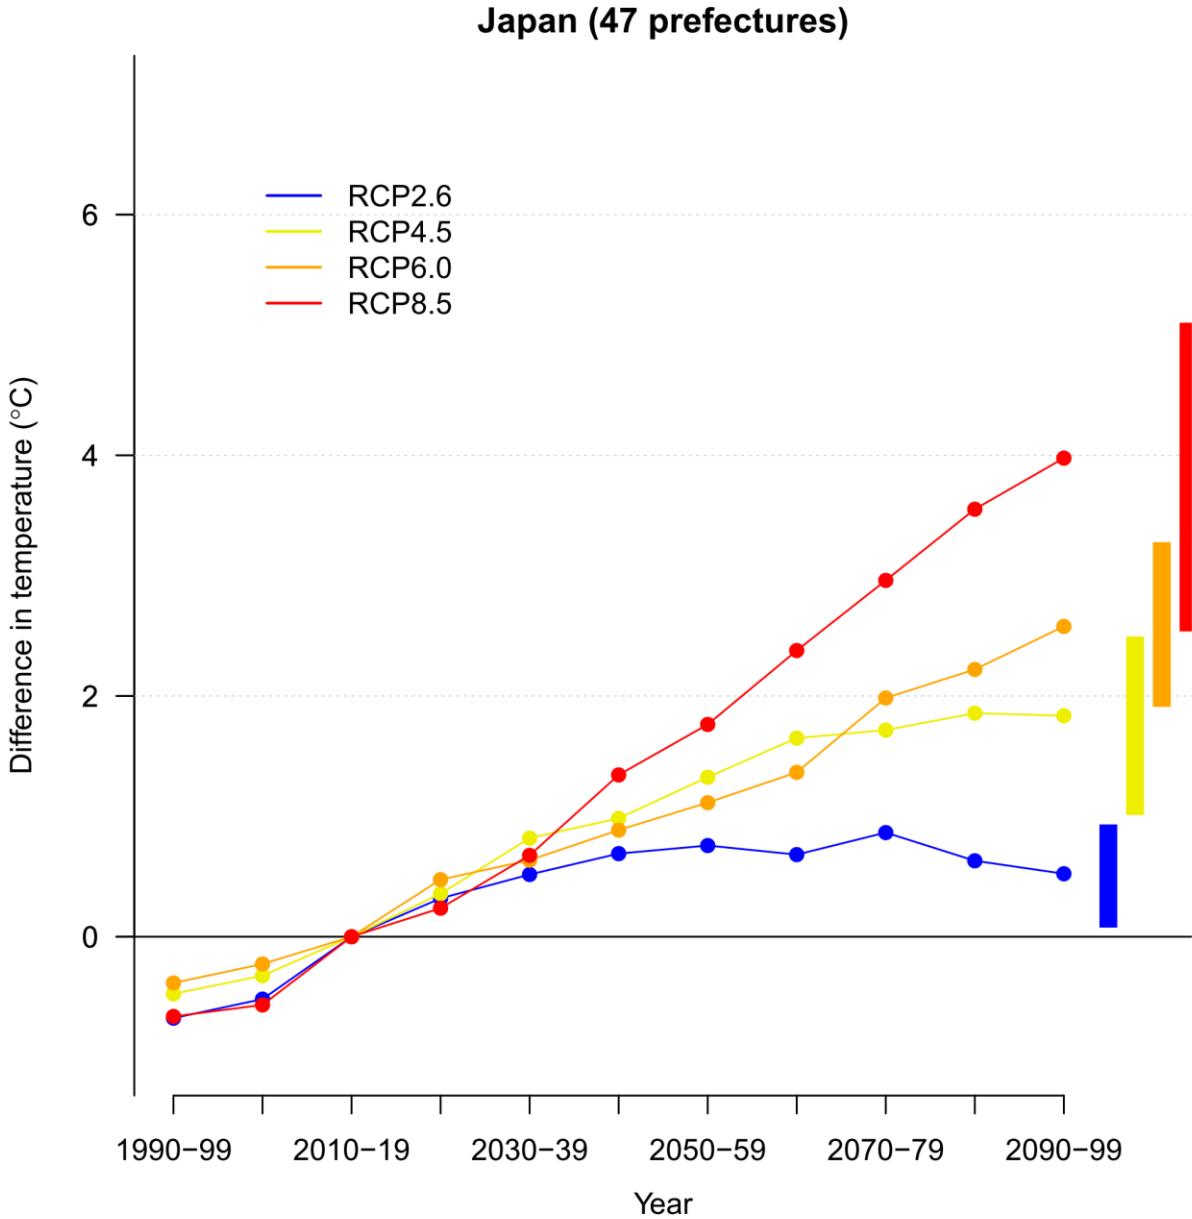

**Figure S3.** Decadal temperature differences by prefecture and scenario. The graphs indicate the differences in prefecture-specific average projected increase in temperature ( $^{\circ}\text{C}$ , GCM-ensemble average) by decade and climate change scenario compared to the present period (2010–2019). Temperatures after the present period are projections, while temperatures prior to the present period were observed. The vertical lines to the right of each graph represent the range of the increase from the present period. GCM=general circulation model; RCP=representative concentration pathway.

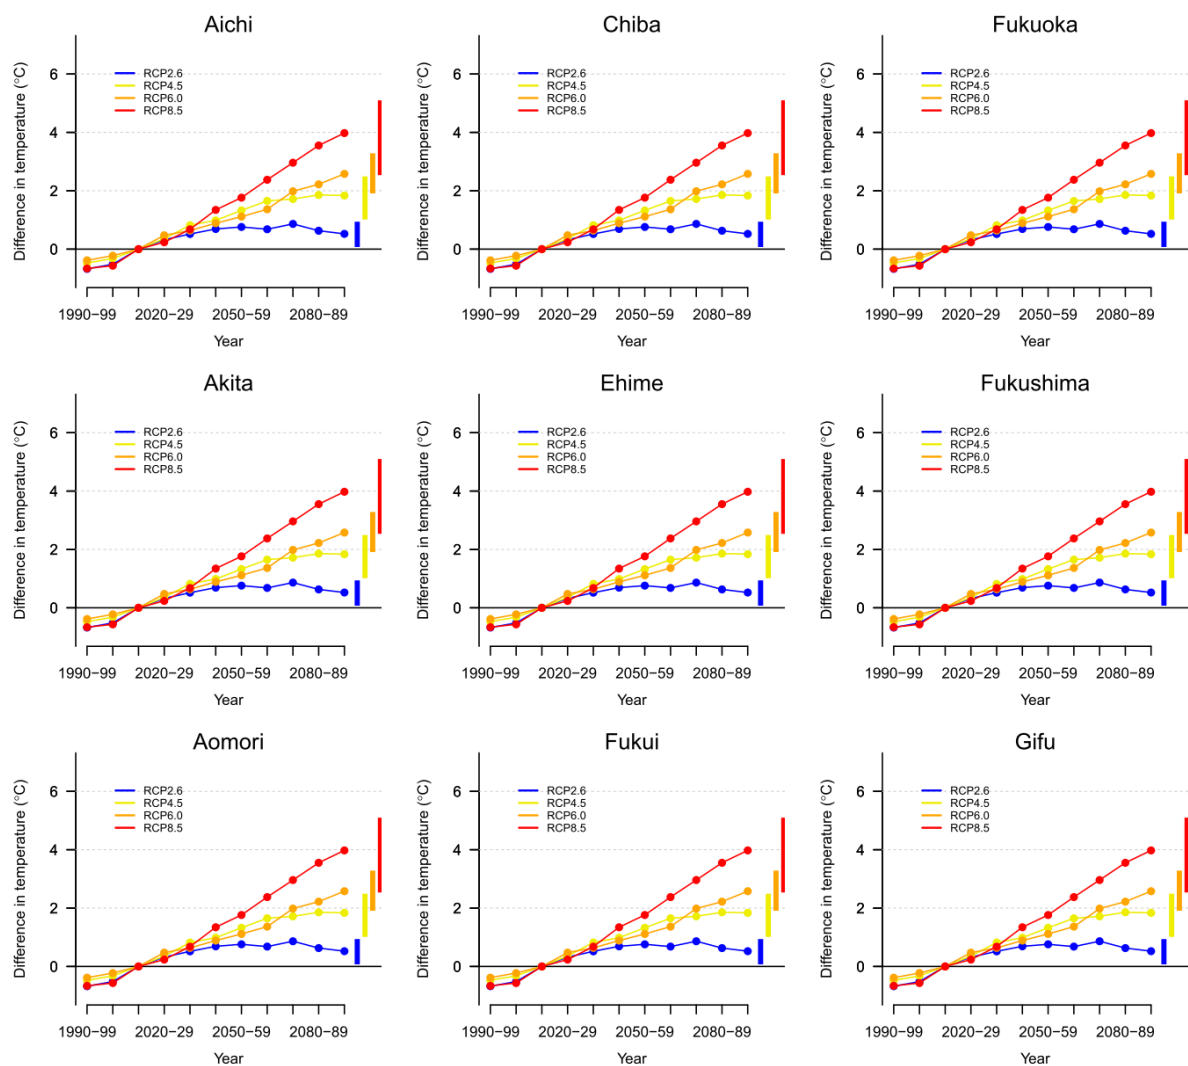

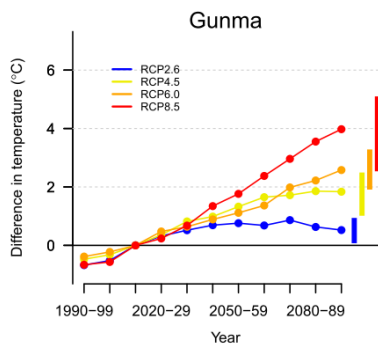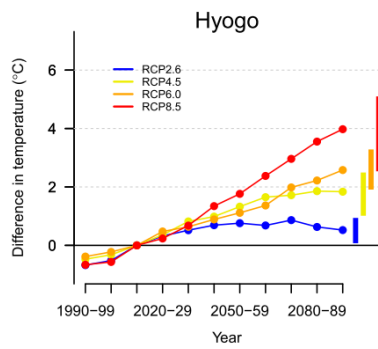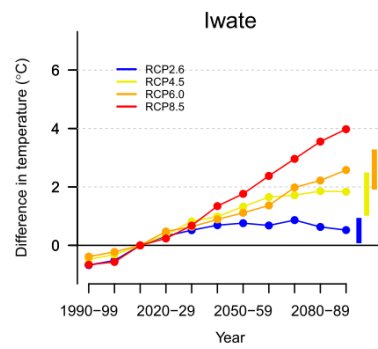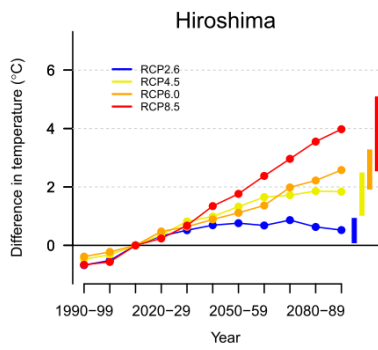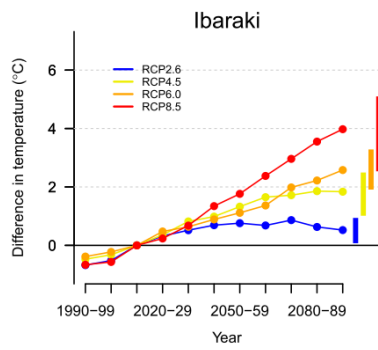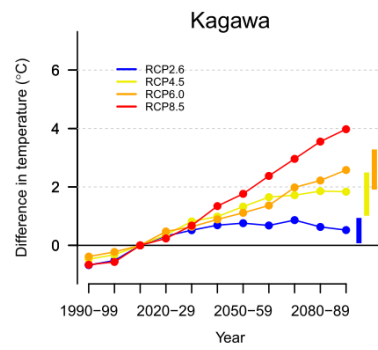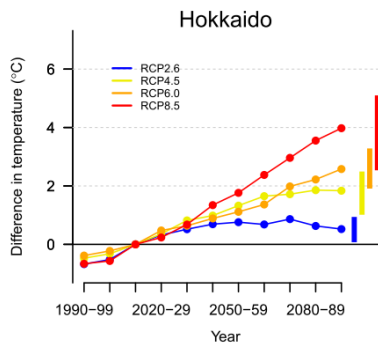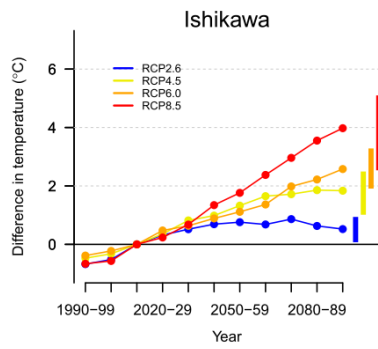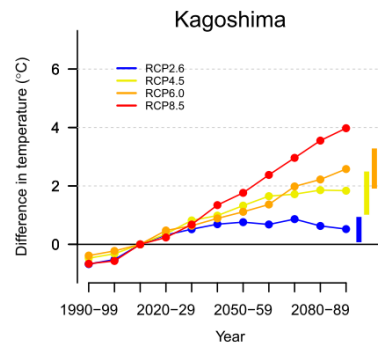







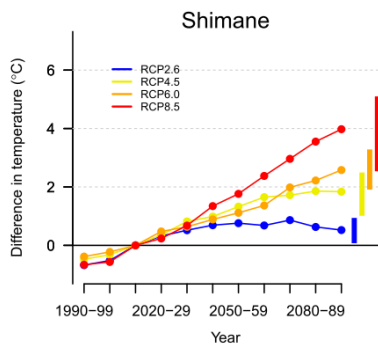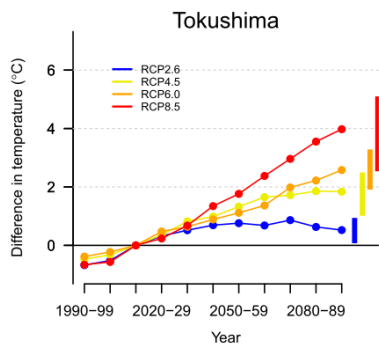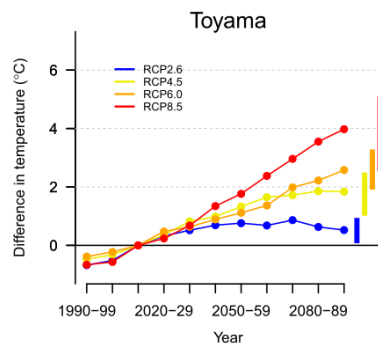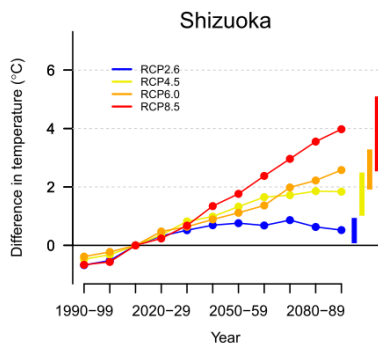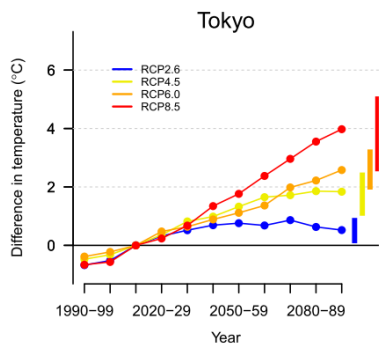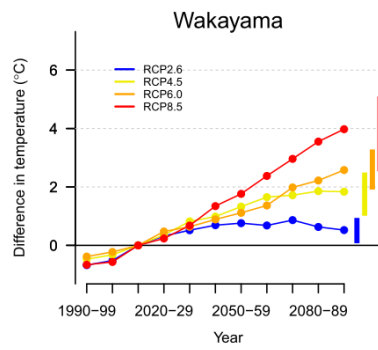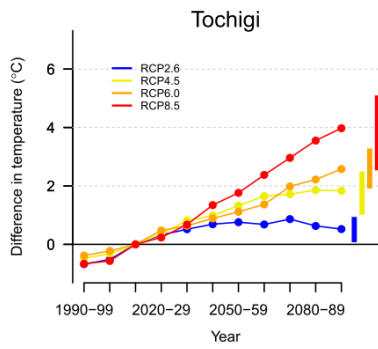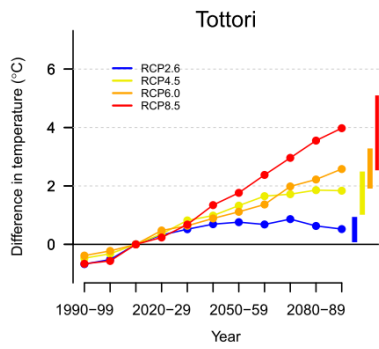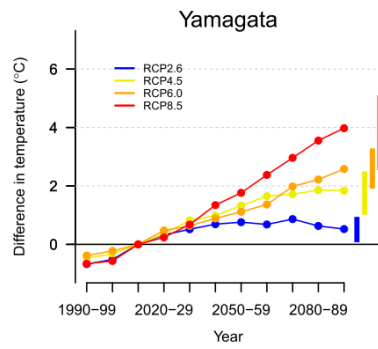

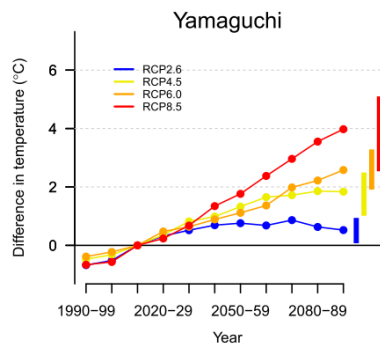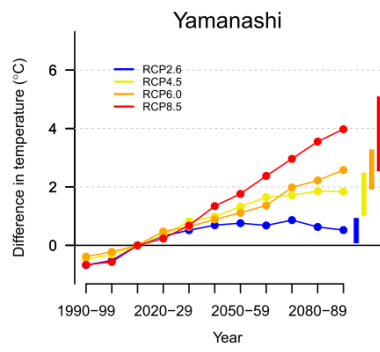

**Figure S4.** Map of prefecture-specific projected changes in temperature (°C, GCM-ensemble average) in 2090–2099 compared to 2010–2019 under RCP8.5 scenario in the 47 Japanese prefectures. GCM=general circulation model; RCP=representative concentration pathway.

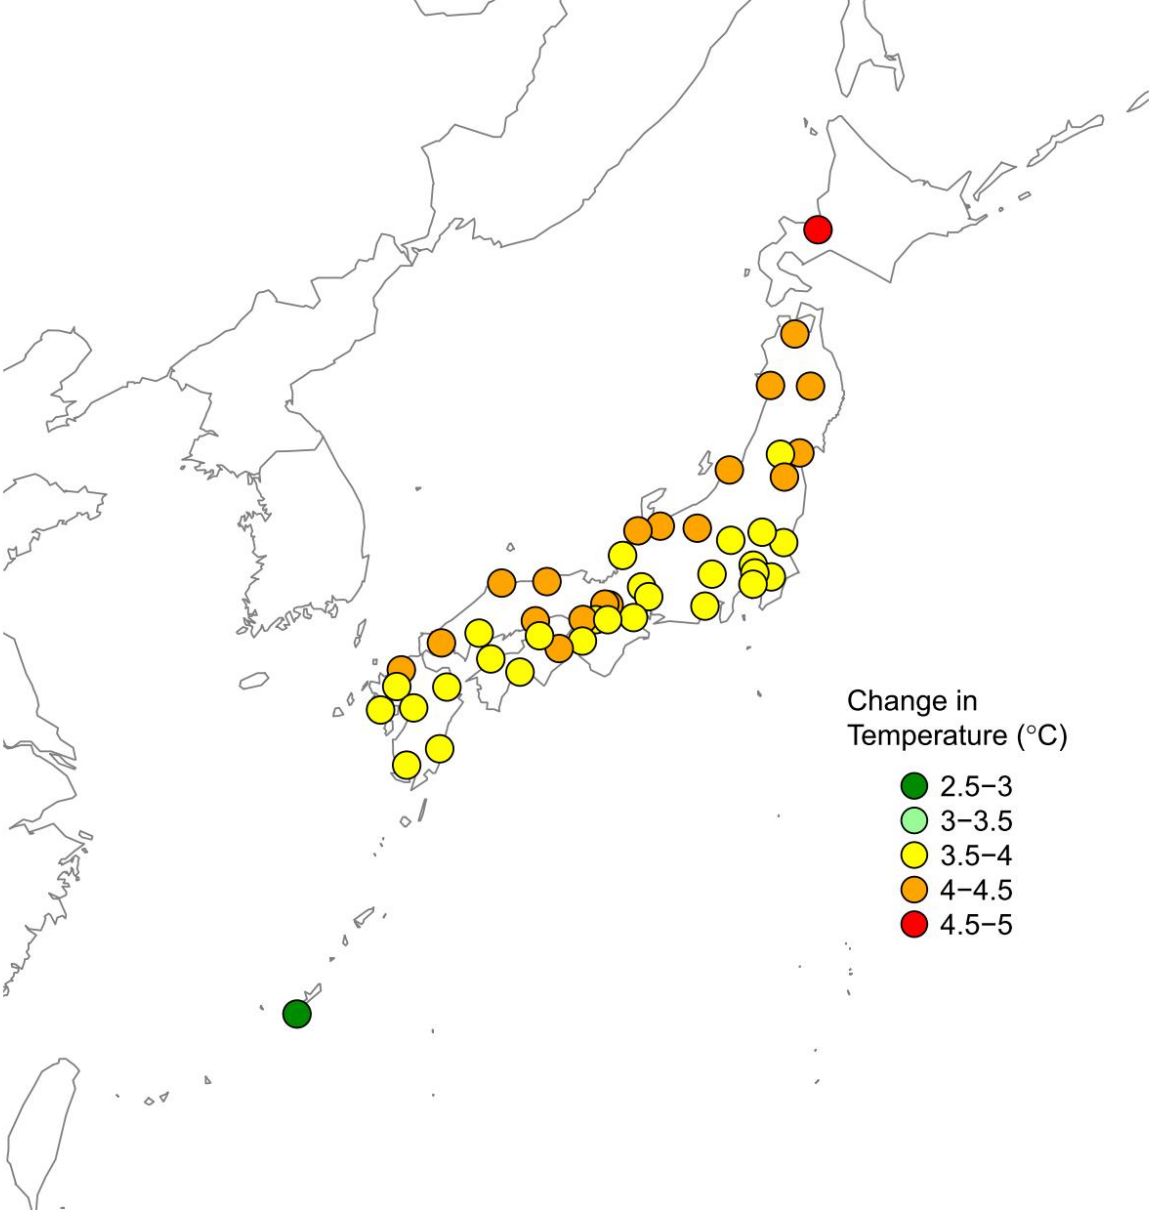

**Figure S5.** Overall cumulative exposure-response associations between the relative risks (95% CI) of diarrhea and temperatures in the 47 Japanese prefectures. Exposure-response associations are expressed as the best linear unbiased prediction (with 95% eCI, shaded grey) with the related temperature distributions. Vertical lines represent the percentile of minimum morbidity temperature (dotted) and the 2.5th and 97.5th percentiles of the temperature distribution (dashed).

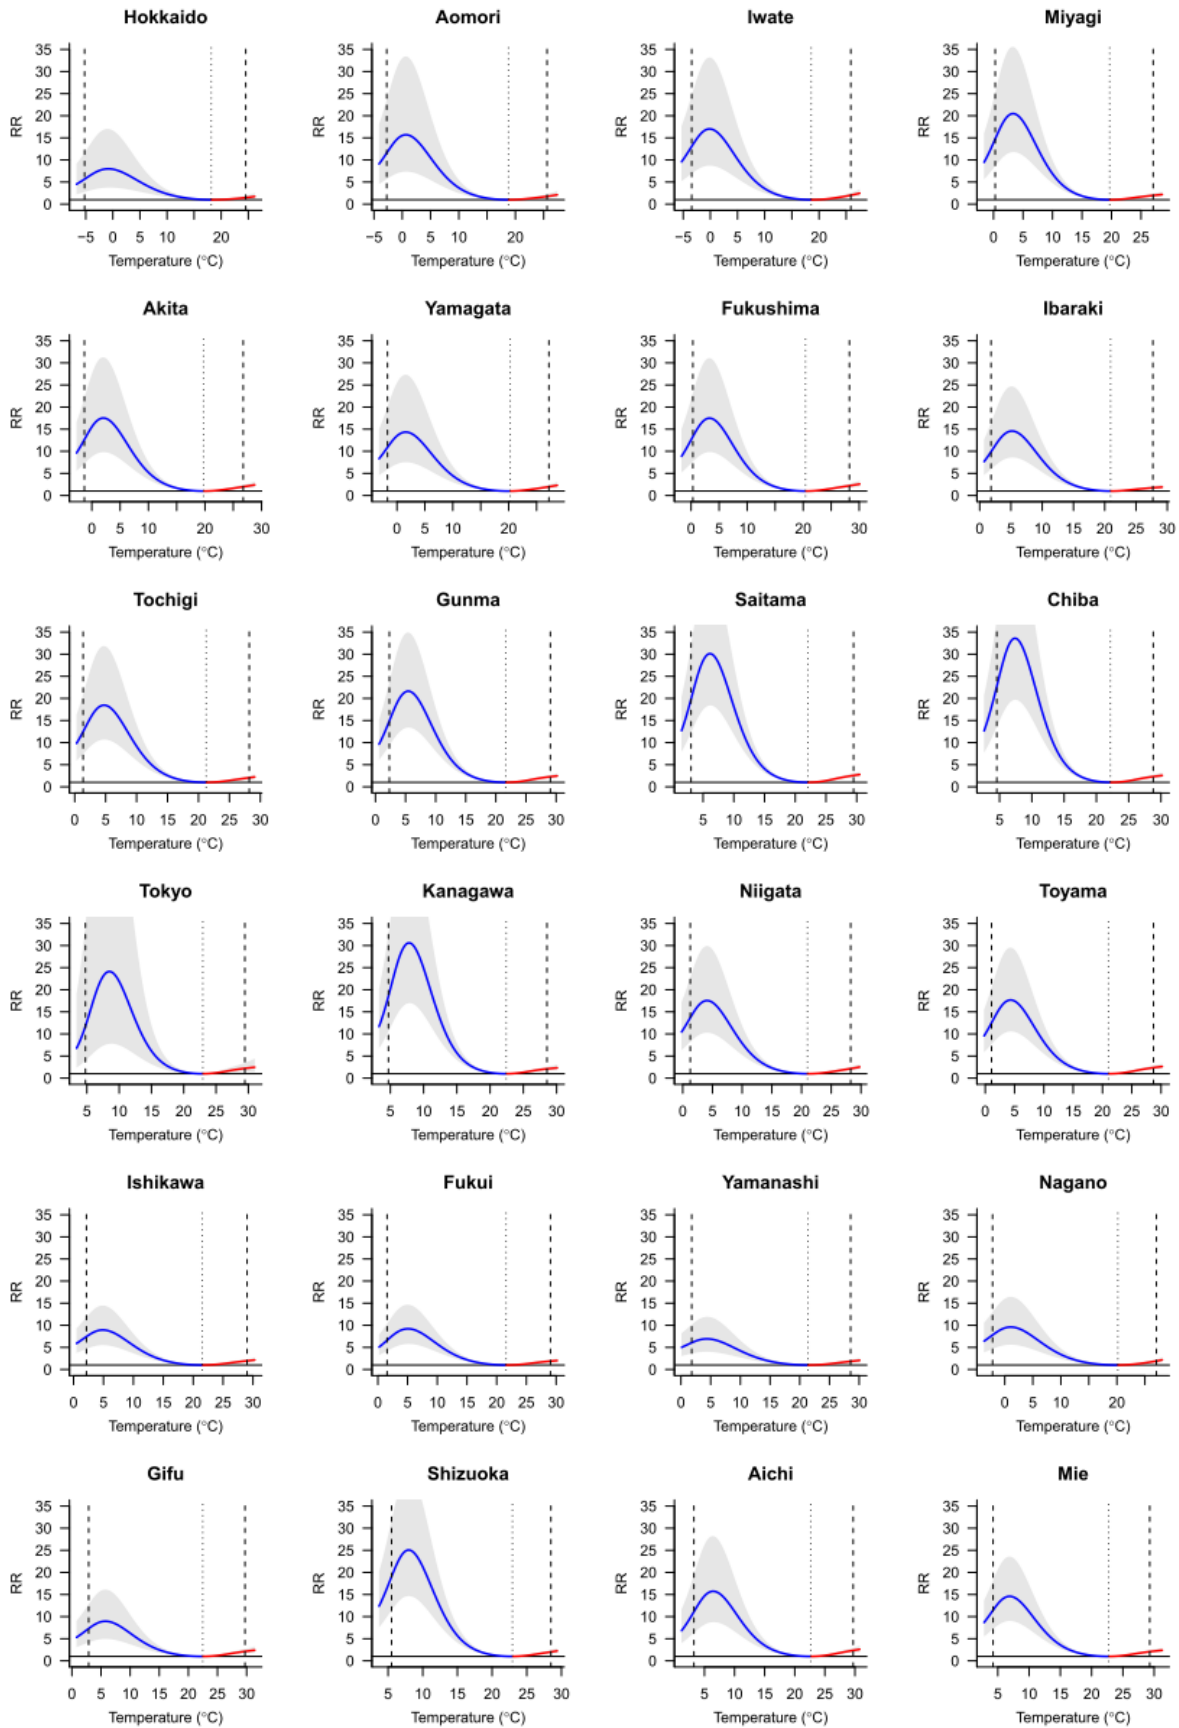

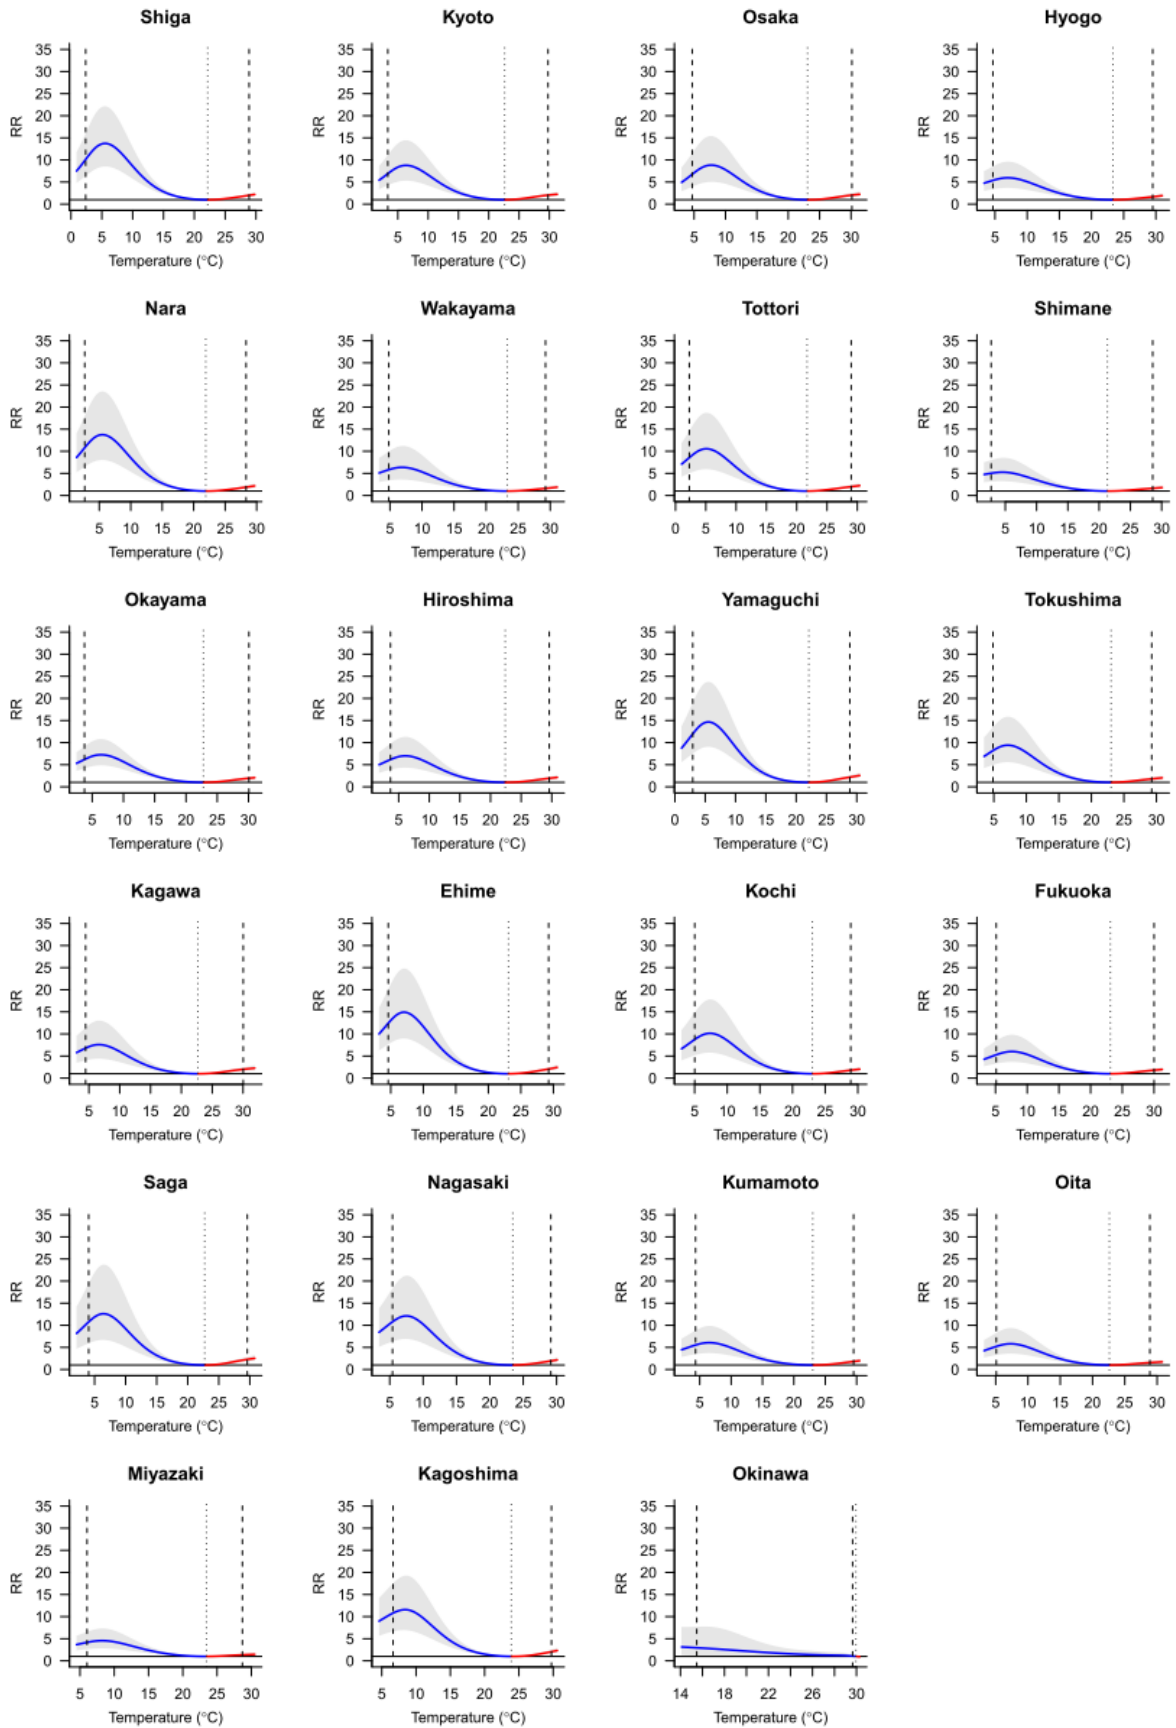

**Figure S6.** Map of prefecture-specific projected changes in heat-related, cold-related, and net excess morbidity (%) in diarrhea in 2090–2099 compared to 2010–2019 under RCP8.5 scenario in the 47 Japanese prefectures. RCP=representative concentration pathway.

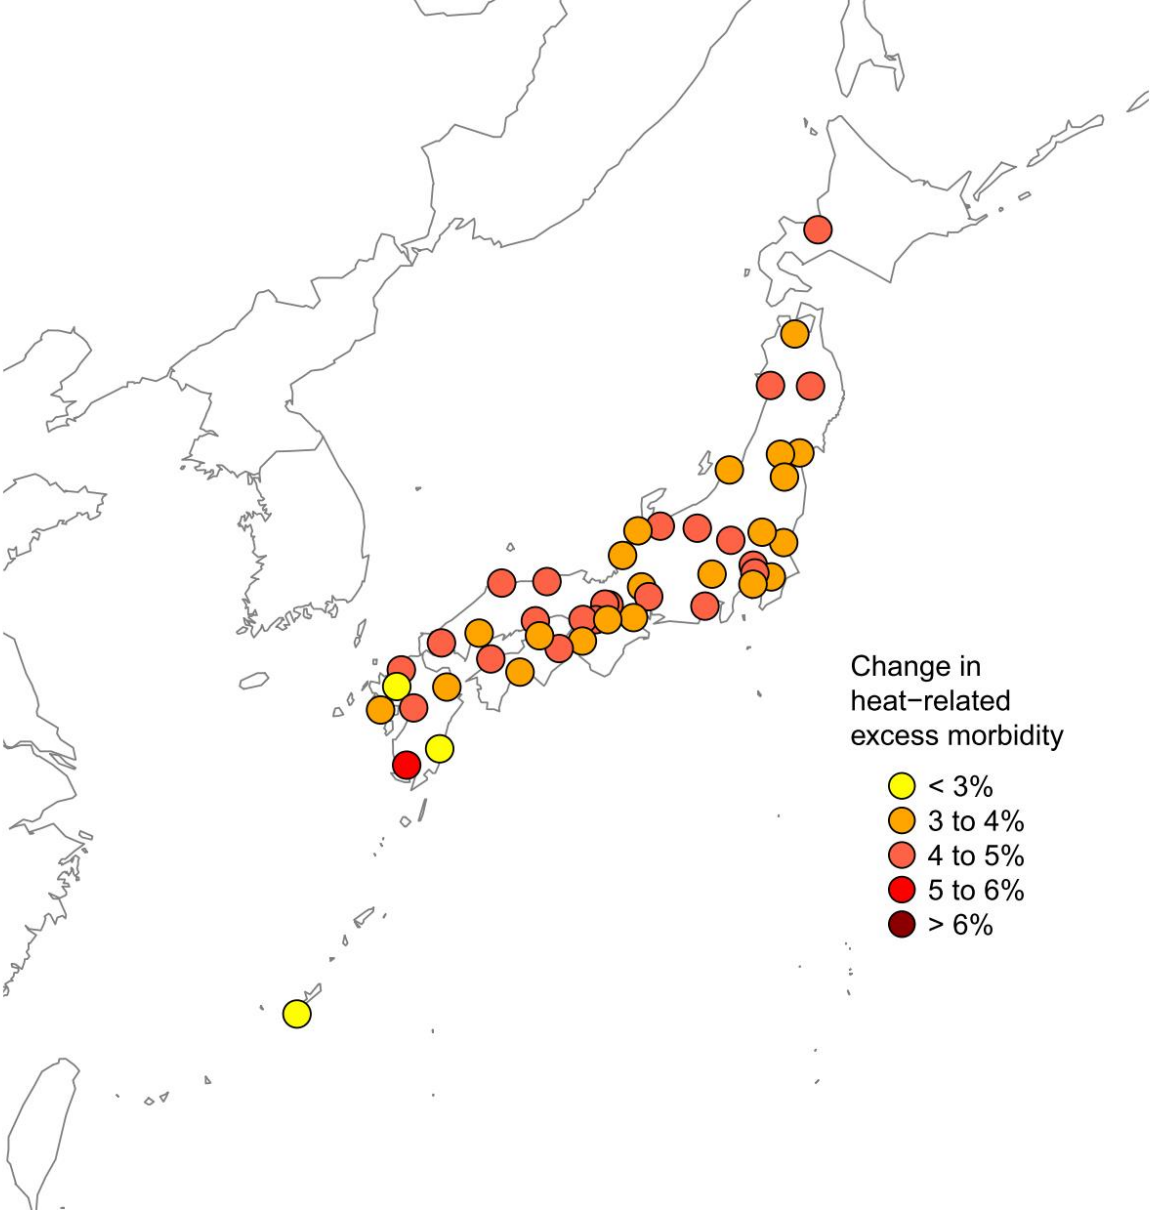



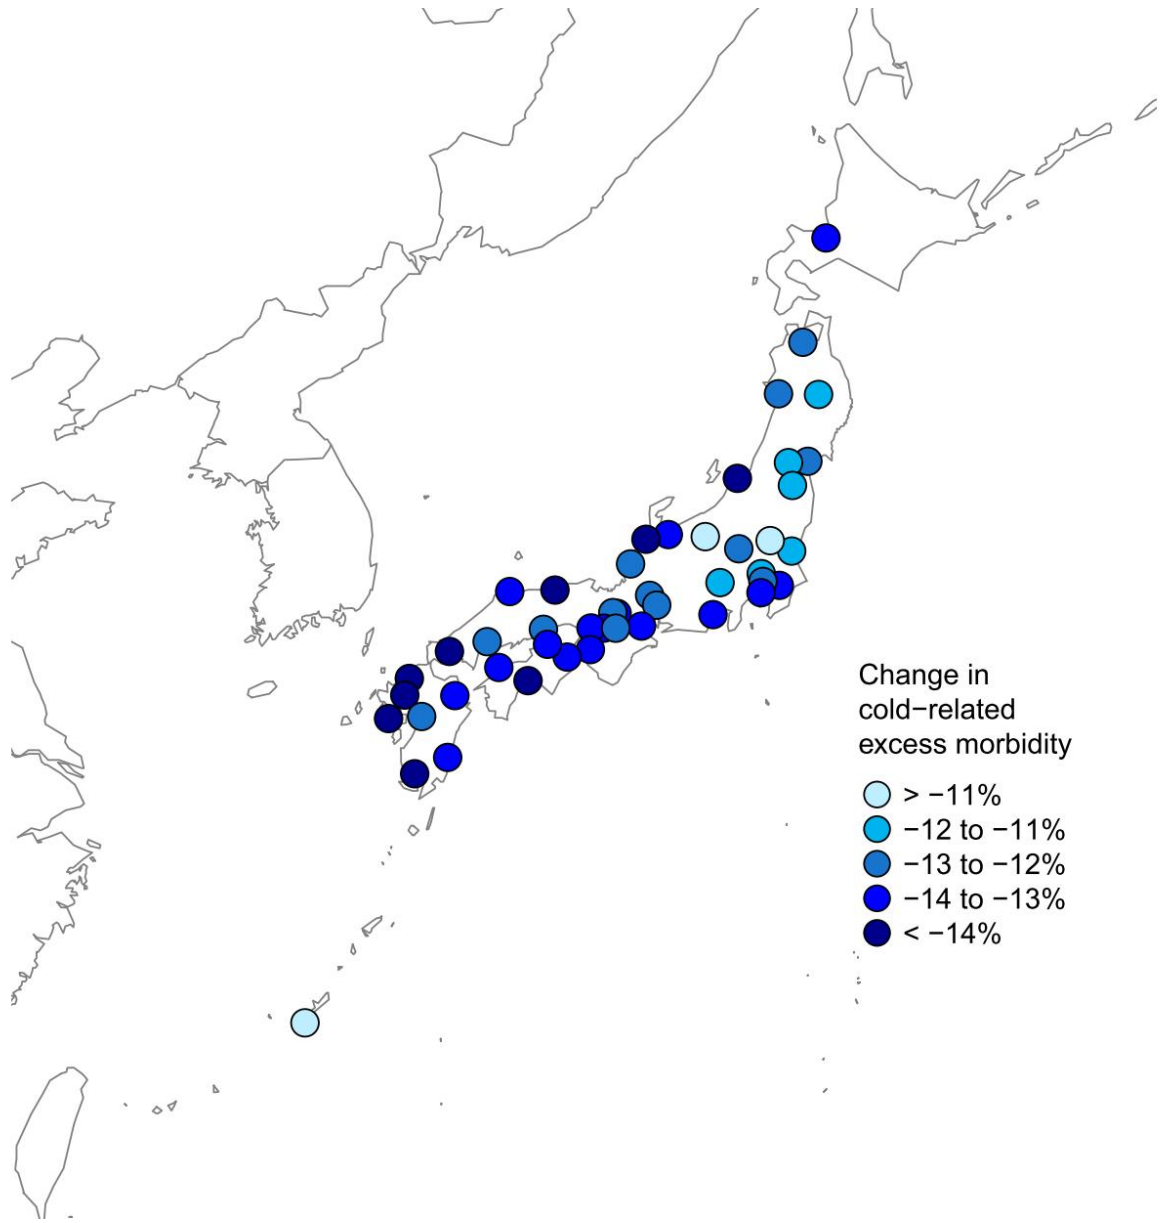

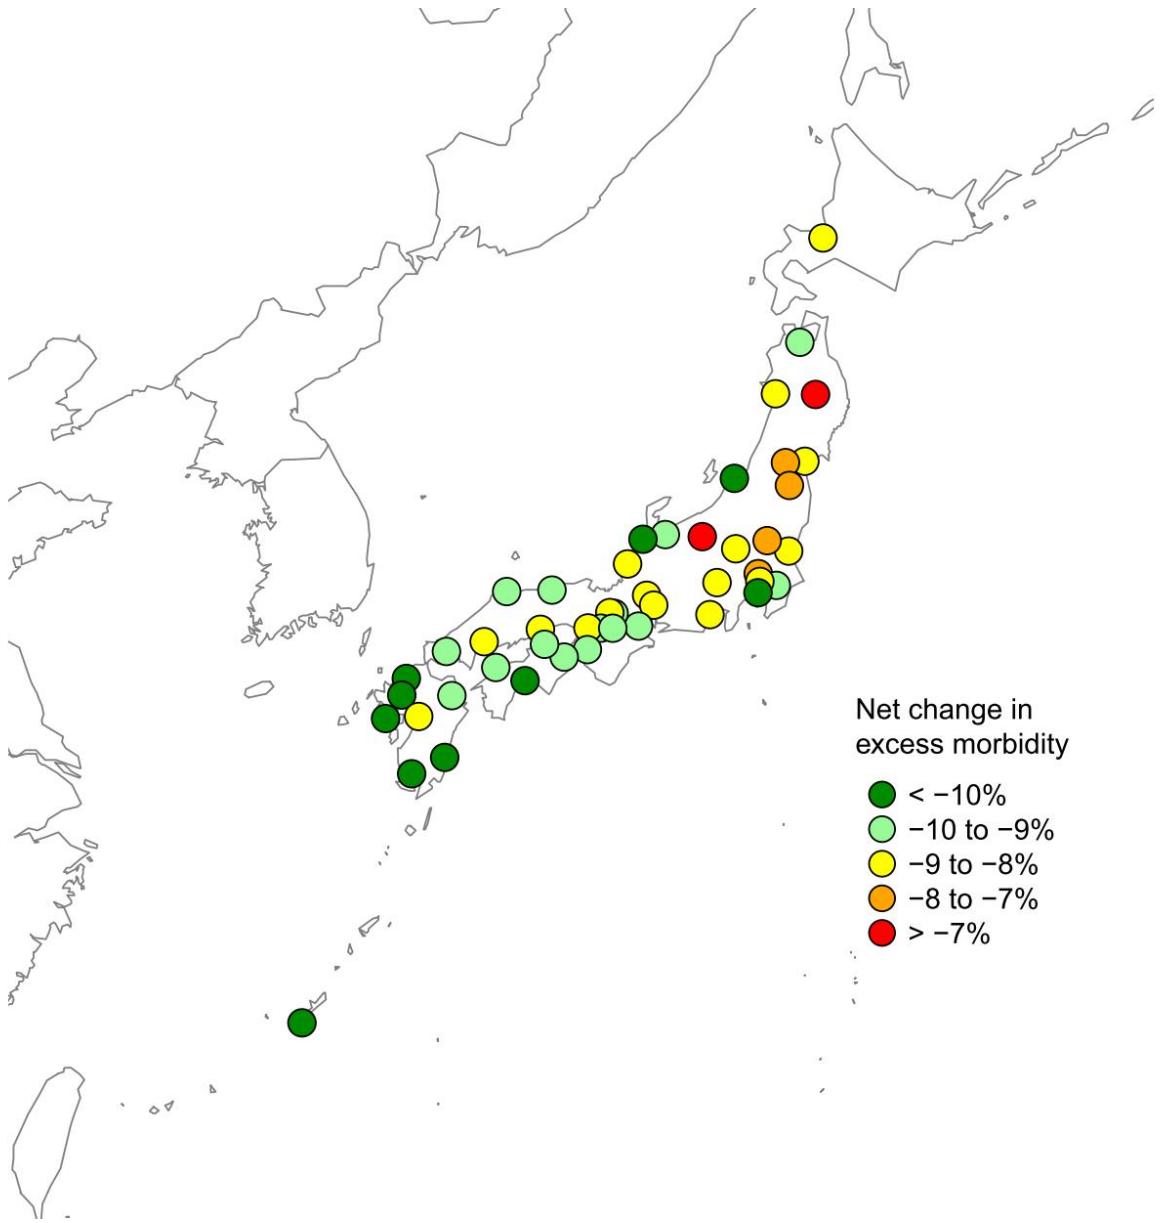

Net change in  
excess morbidity

- $< -10\%$
- $-10$  to  $-9\%$
- $-9$  to  $-8\%$
- $-8$  to  $-7\%$
- $> -7\%$

**Figure S7.** Trends in heat-related and cold-related excess morbidity in diarrhea by prefecture.

RCP=representative concentration pathway.

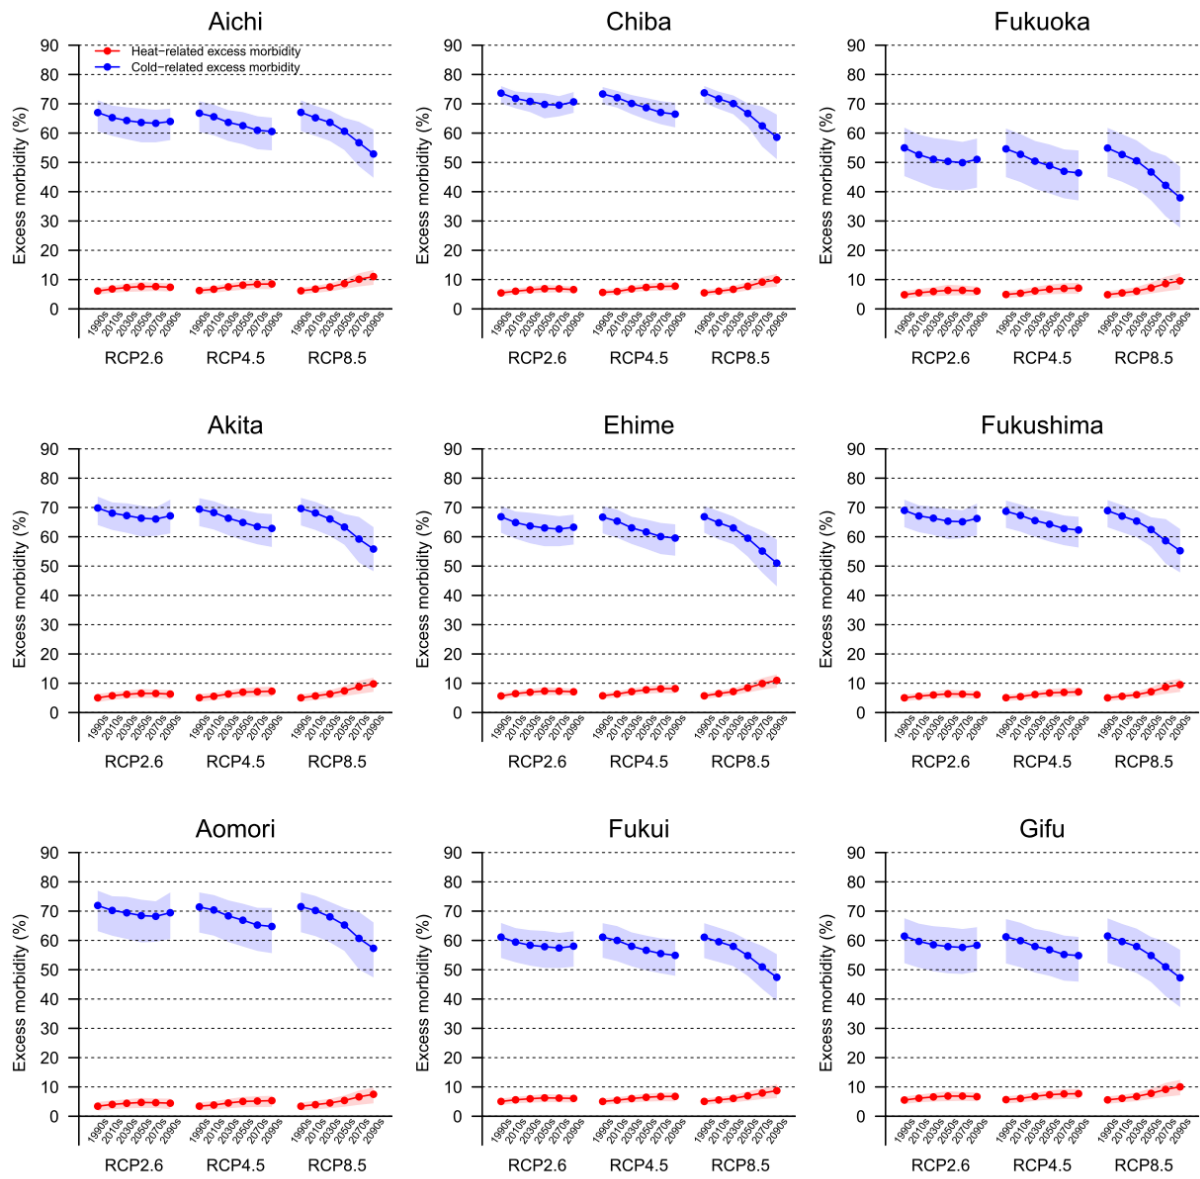

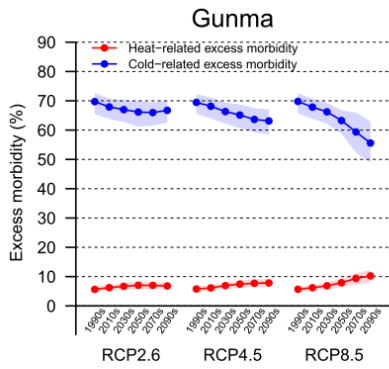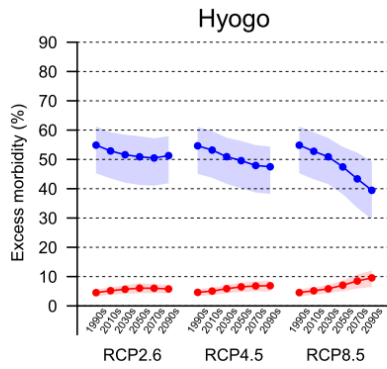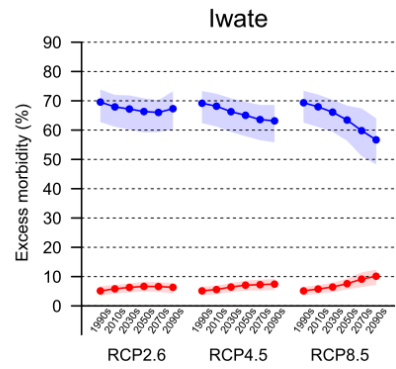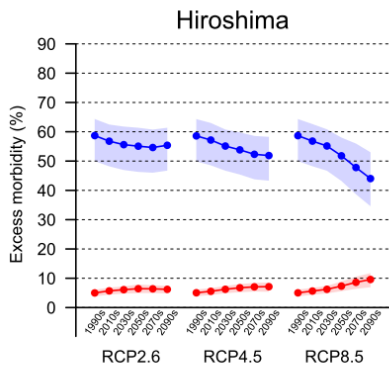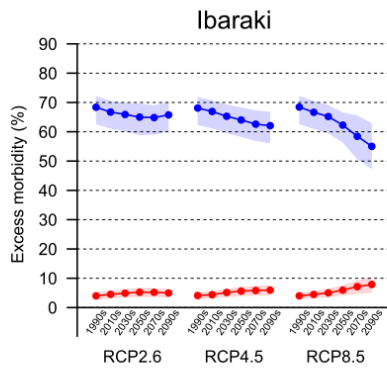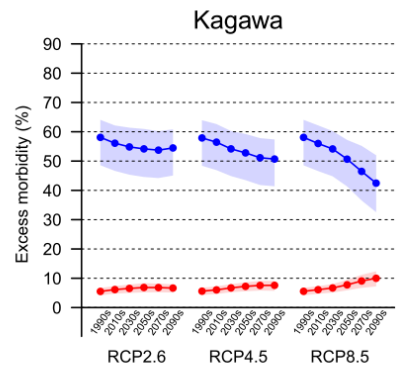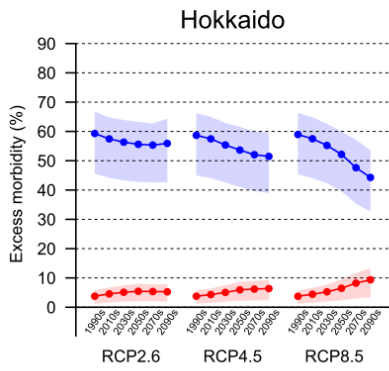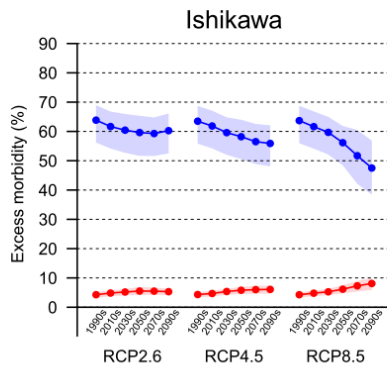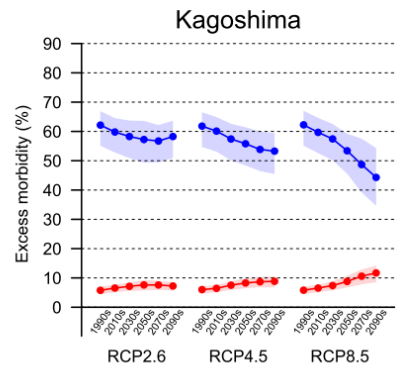

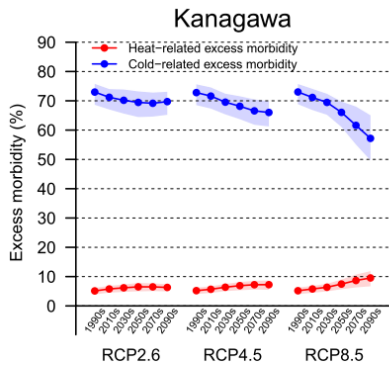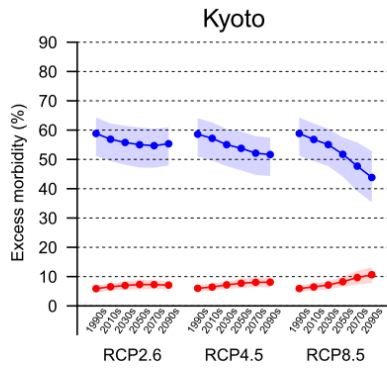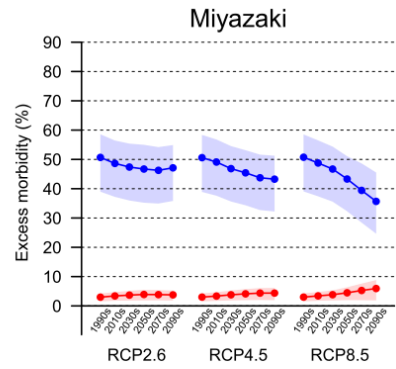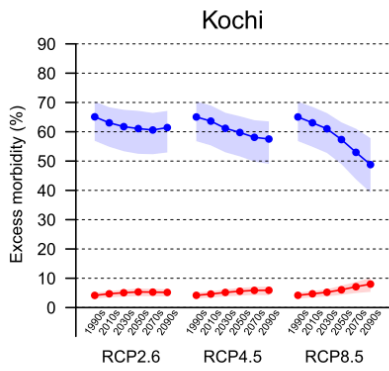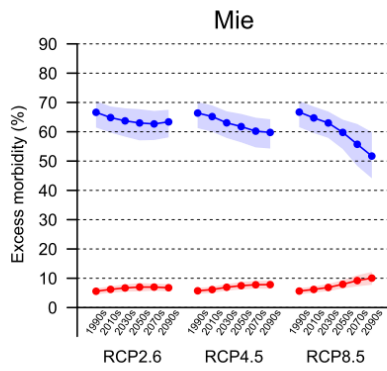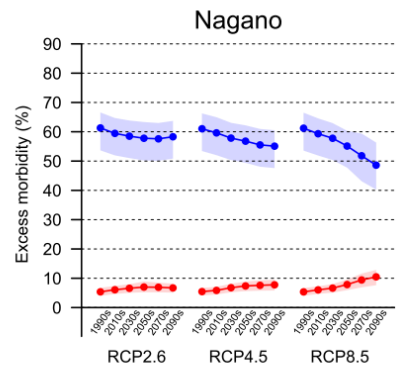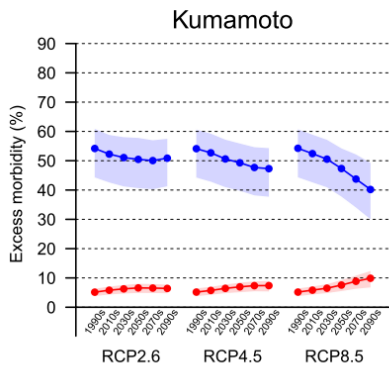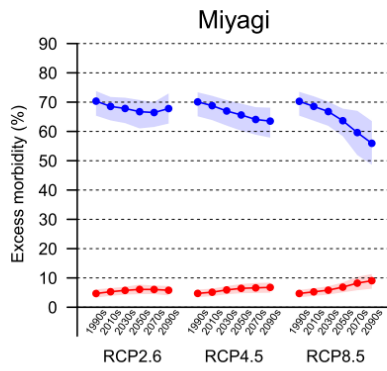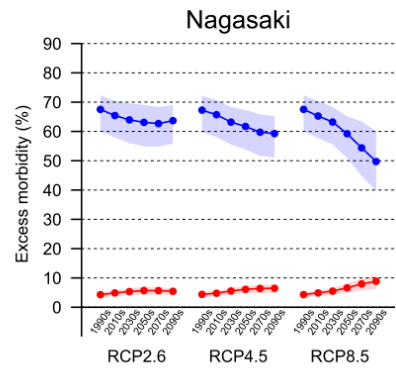

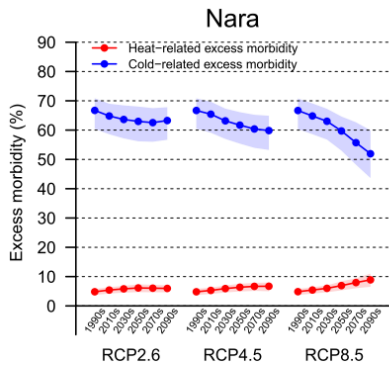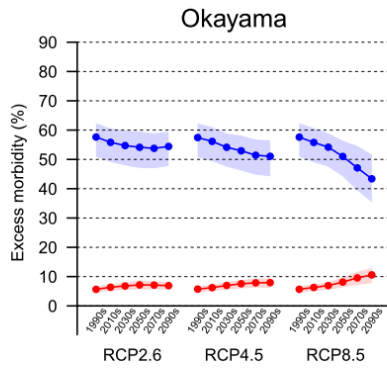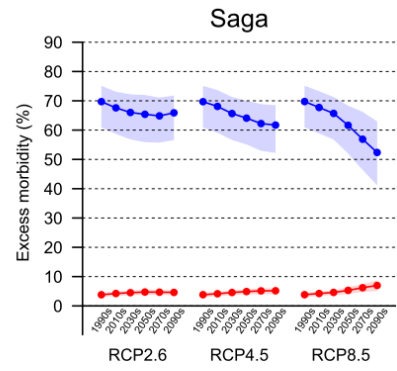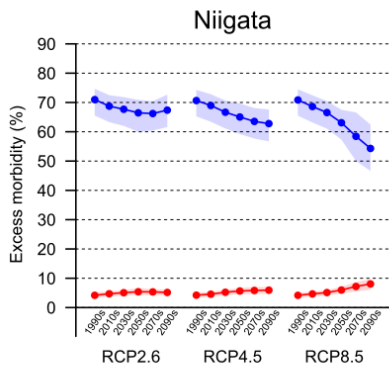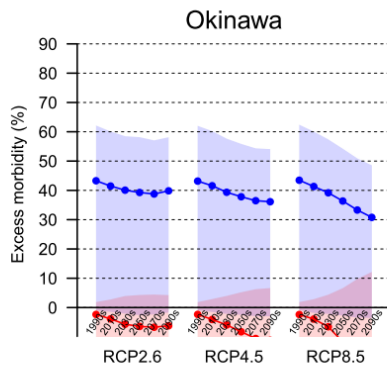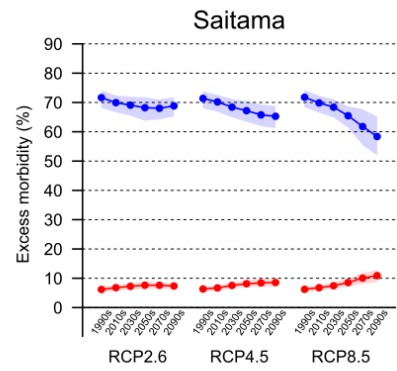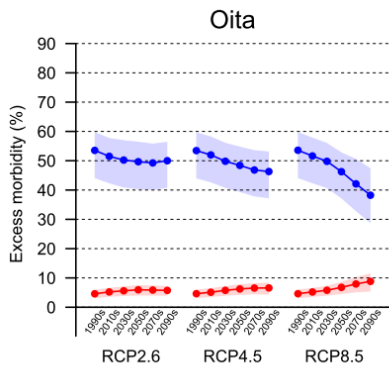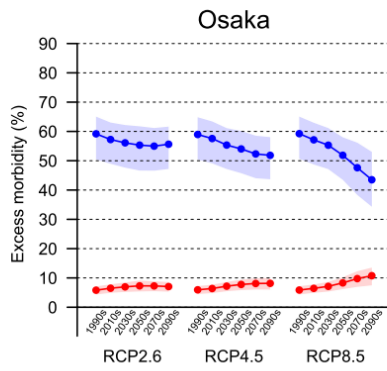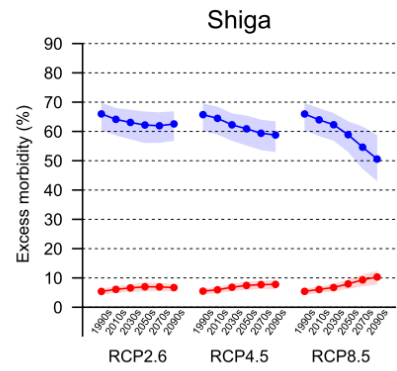

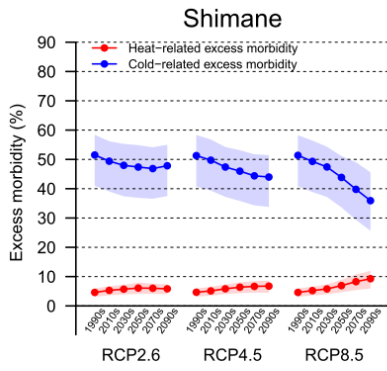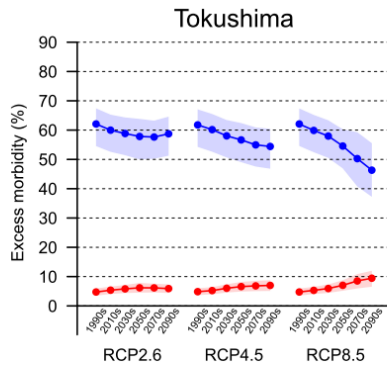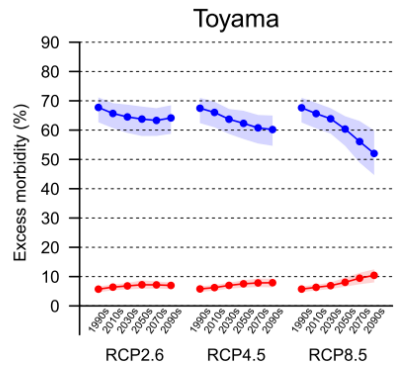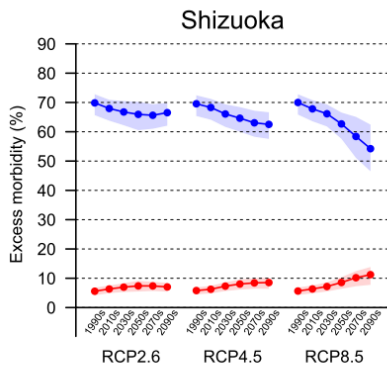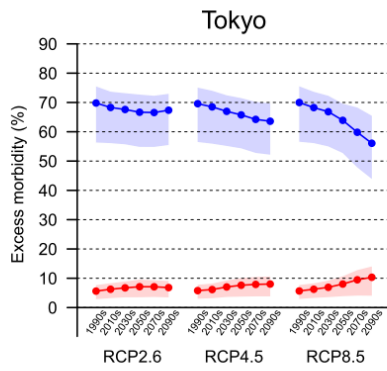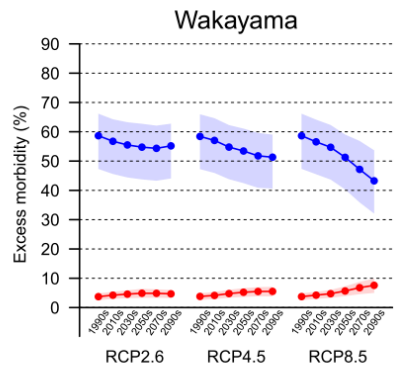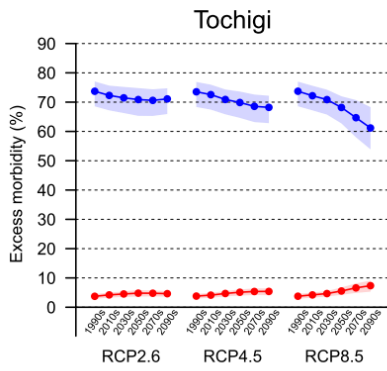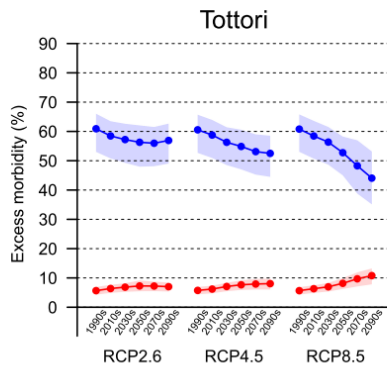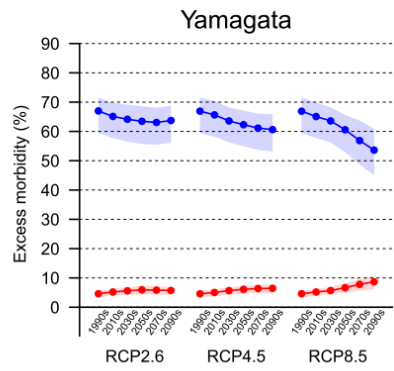

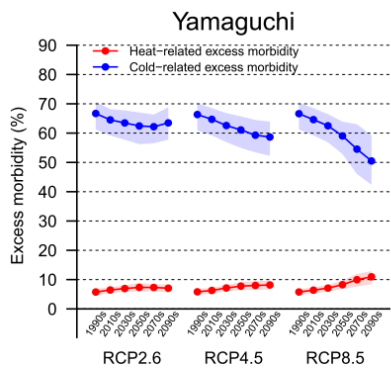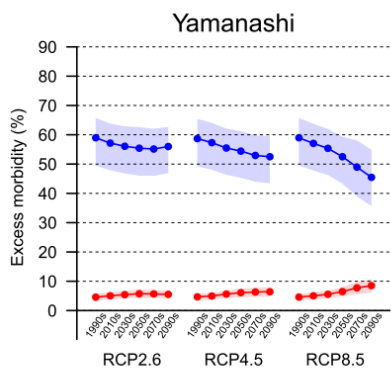



**Figure S8.** Temporal change in excess morbidity in diarrhea by prefecture.

RCP=representative concentration pathway.

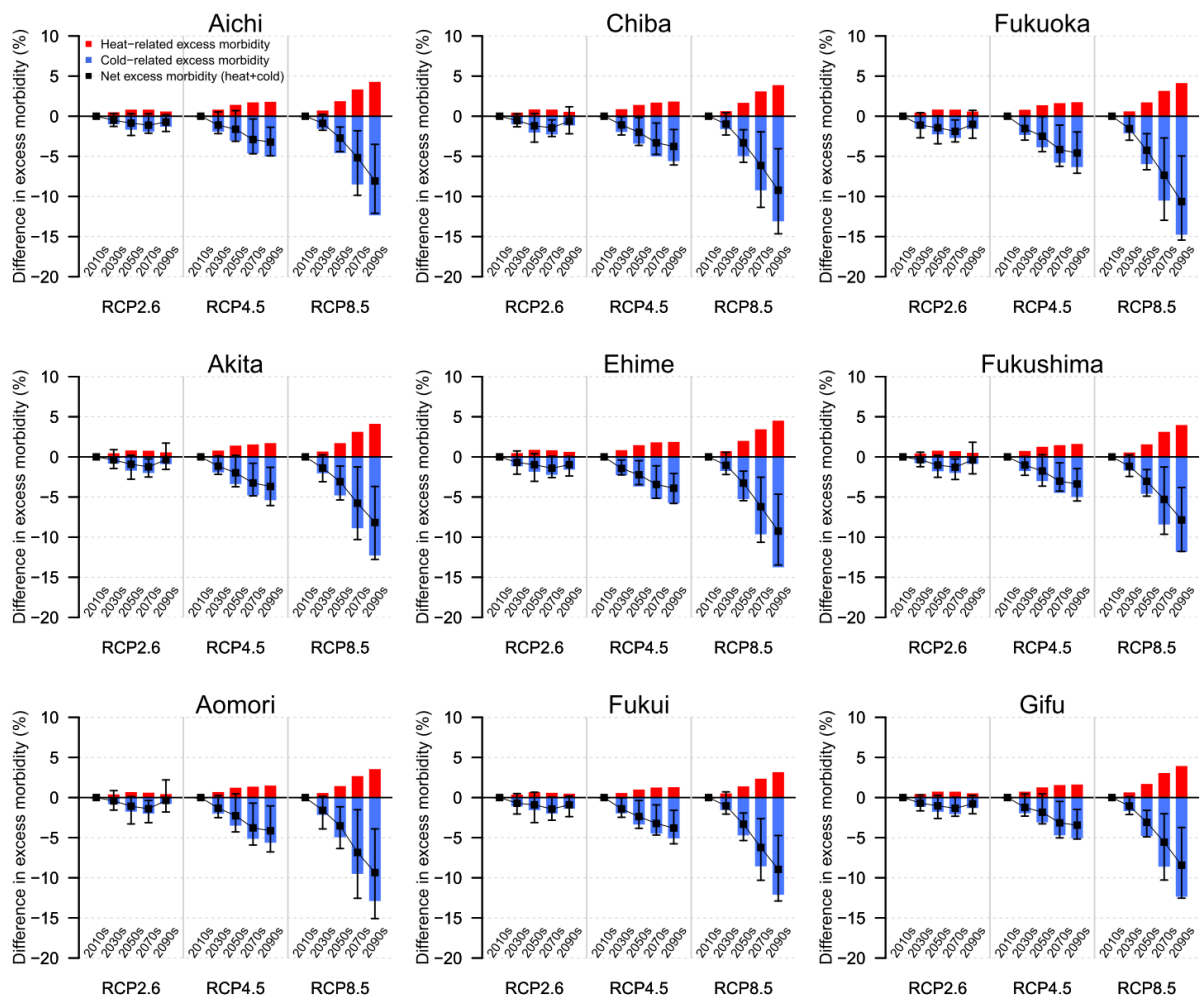

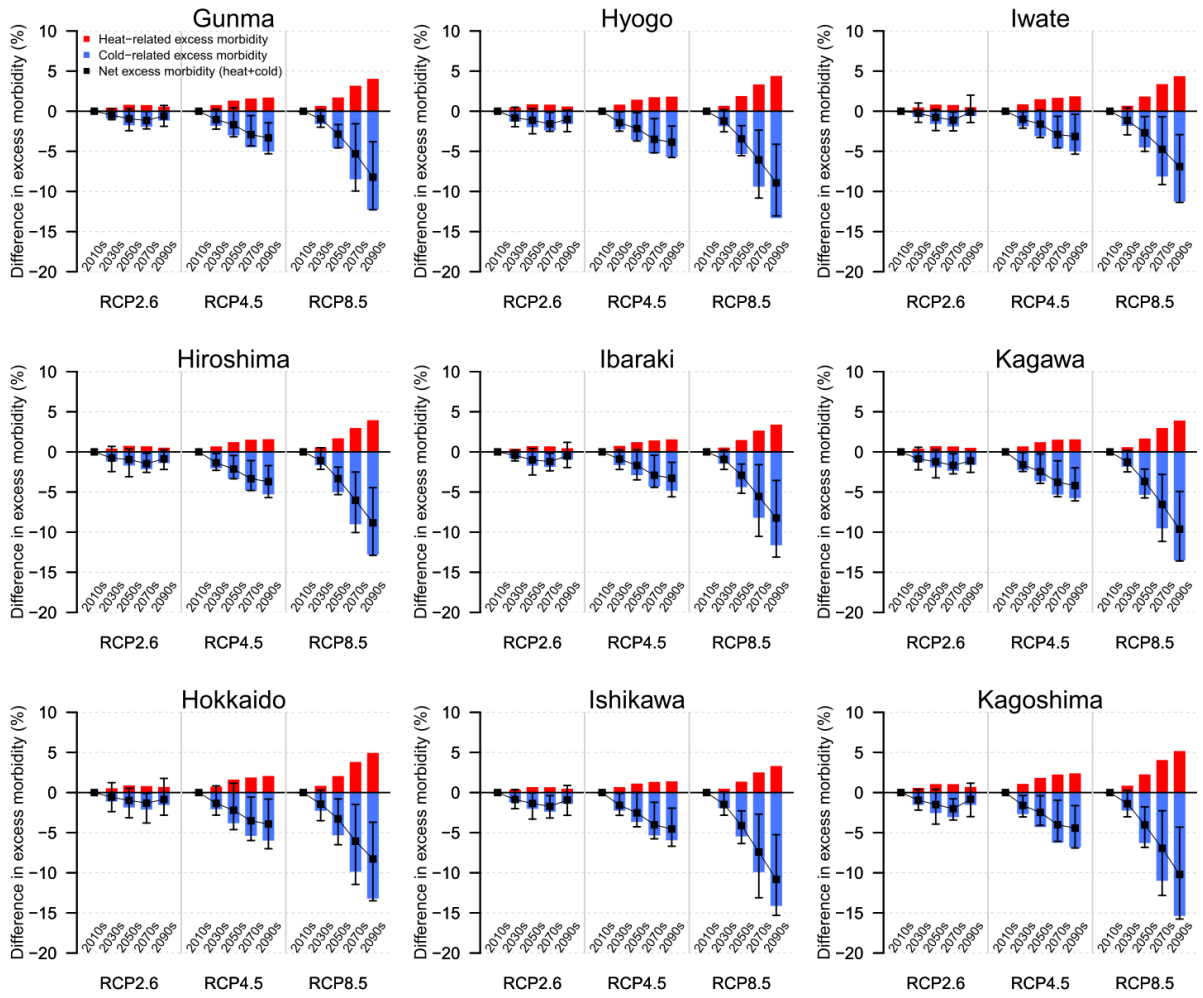

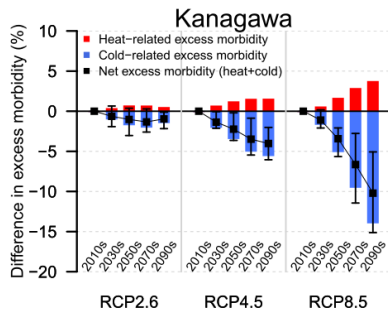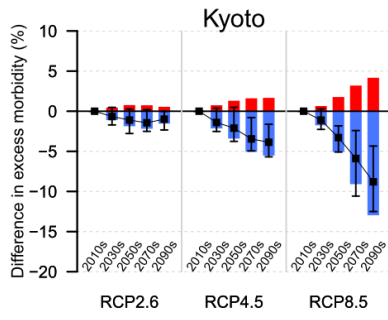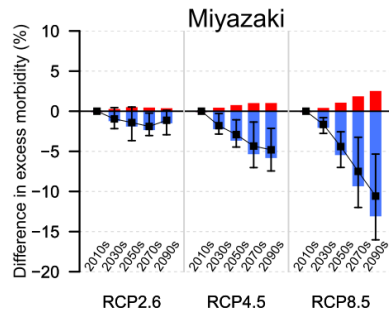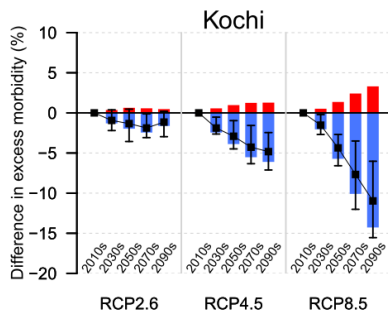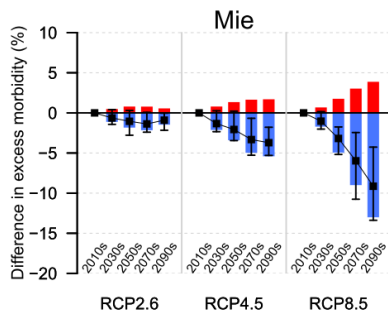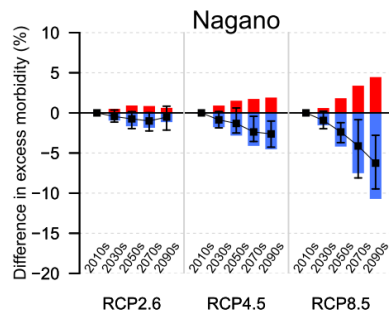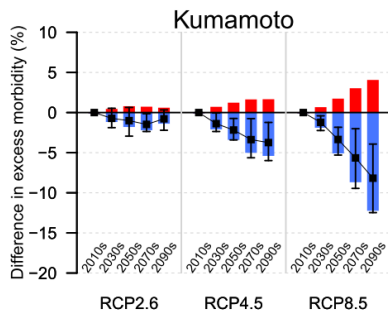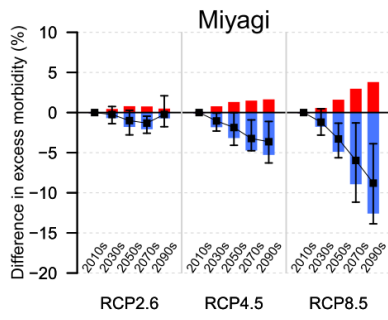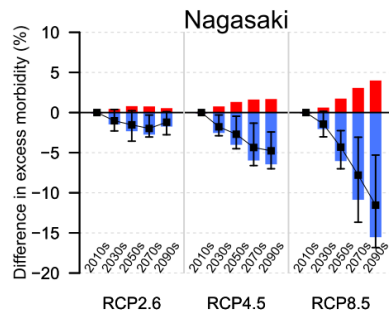

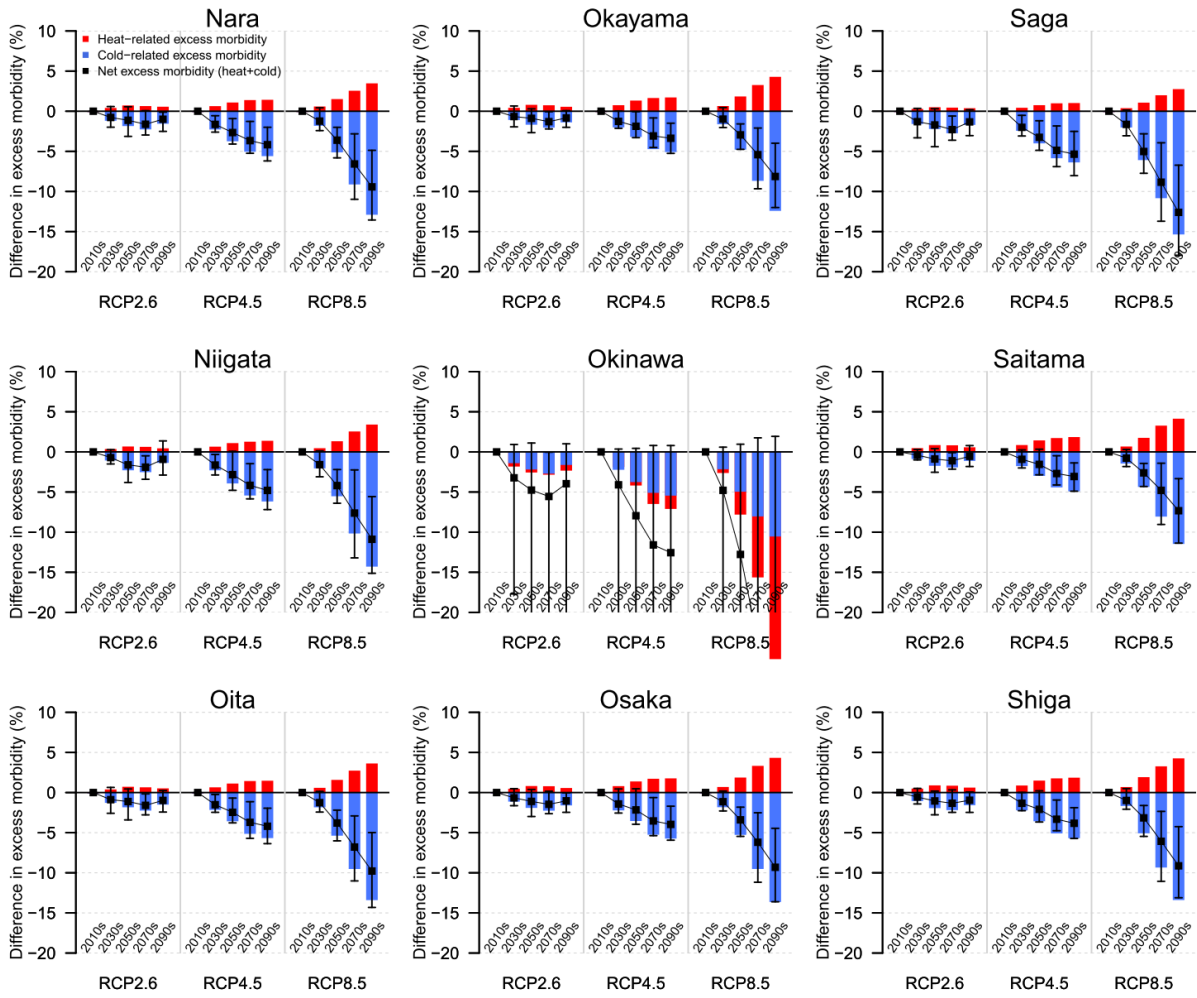

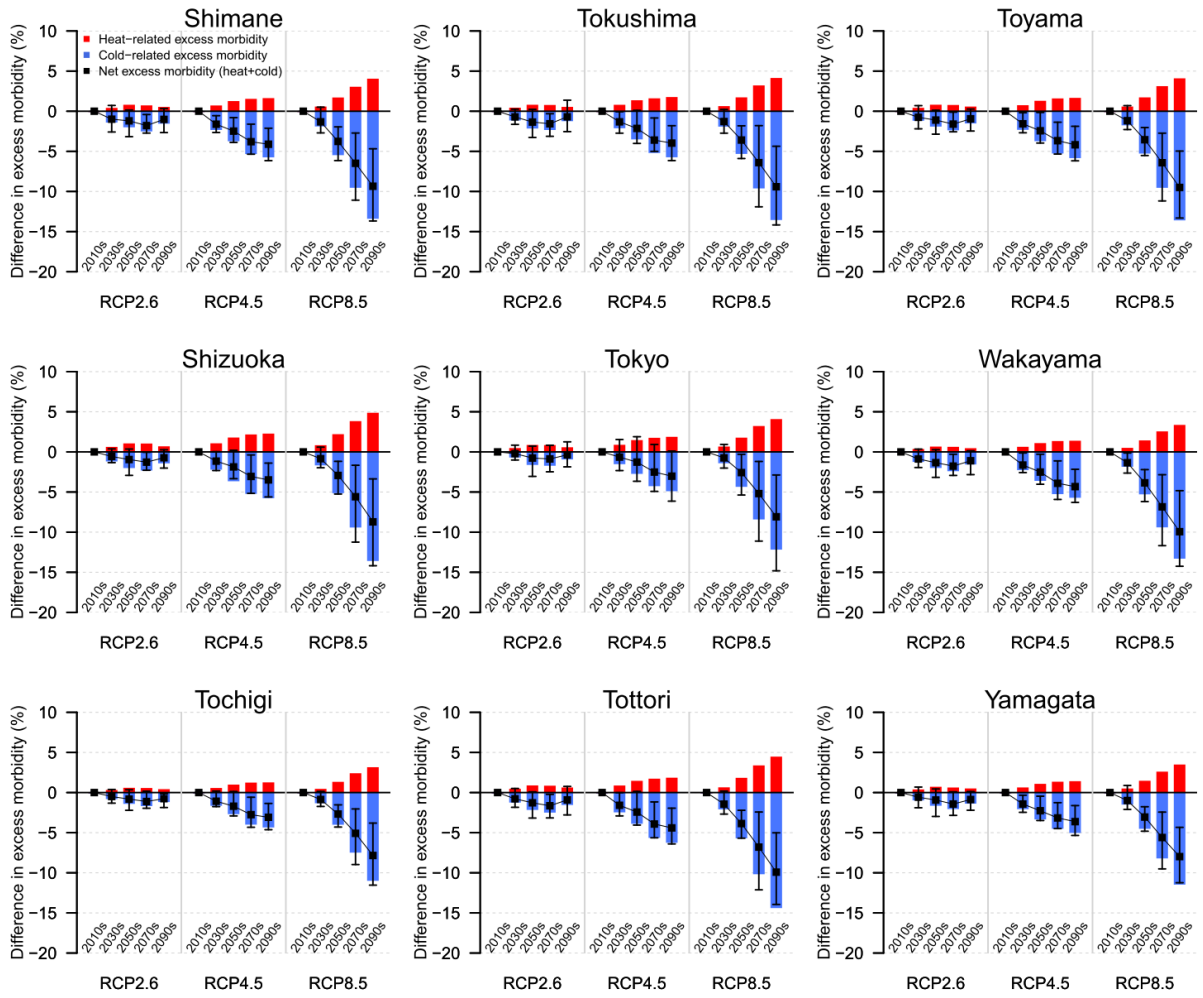

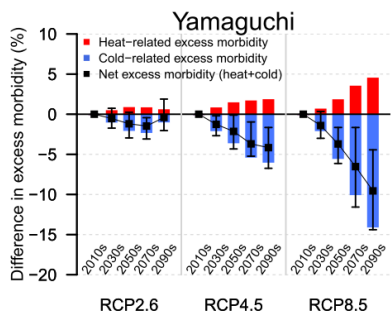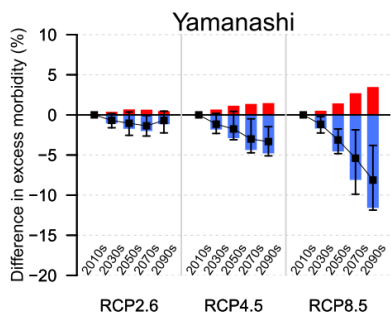

**Figure S9.** Sensitivity analysis by using uniform daily outcome counts within each week:

Overall cumulative exposure-response associations between the relative risks (95% eCI) of diarrhea and temperatures in the 47 Japanese prefectures. Exposure-response associations are expressed as the best linear unbiased prediction (with 95% eCI, shaded grey) with the related temperature distributions. Vertical lines represent the percentile of minimum morbidity temperature (dotted) and the 2.5th and 97.5th percentiles of the temperature distribution (dashed).

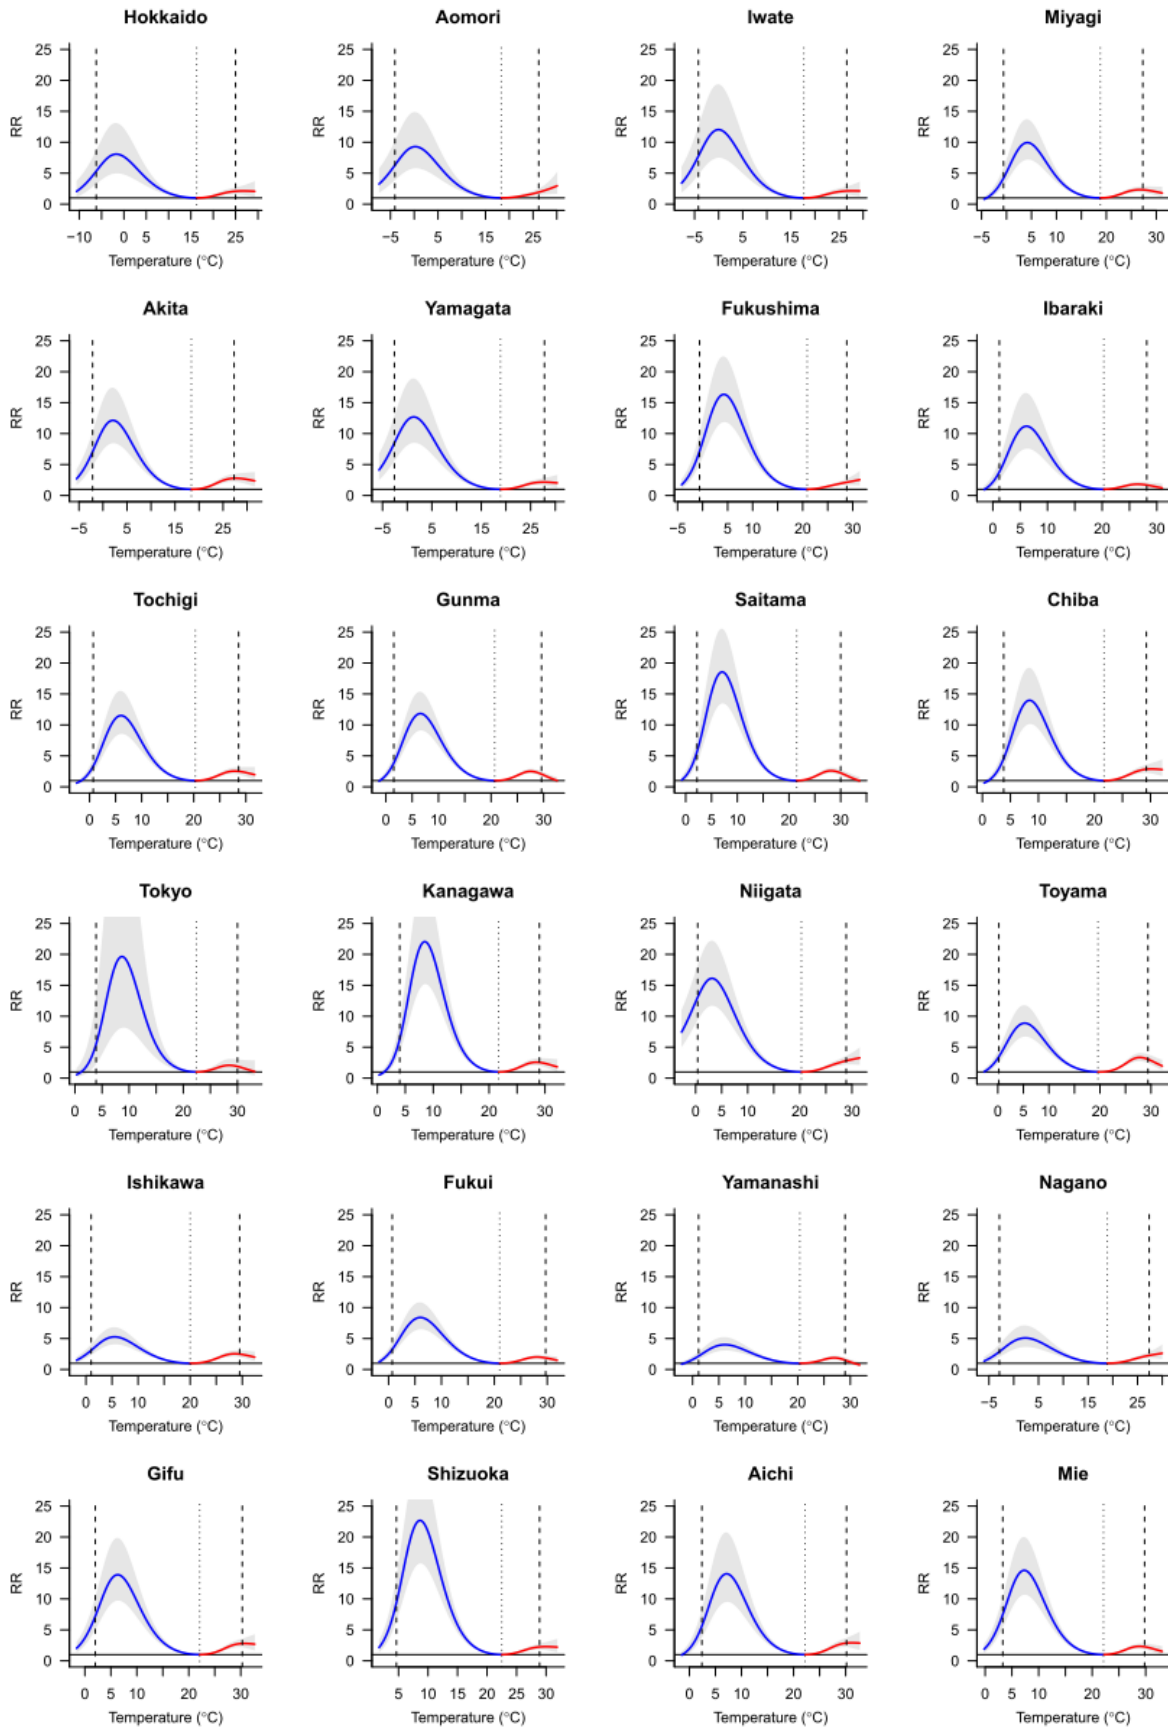



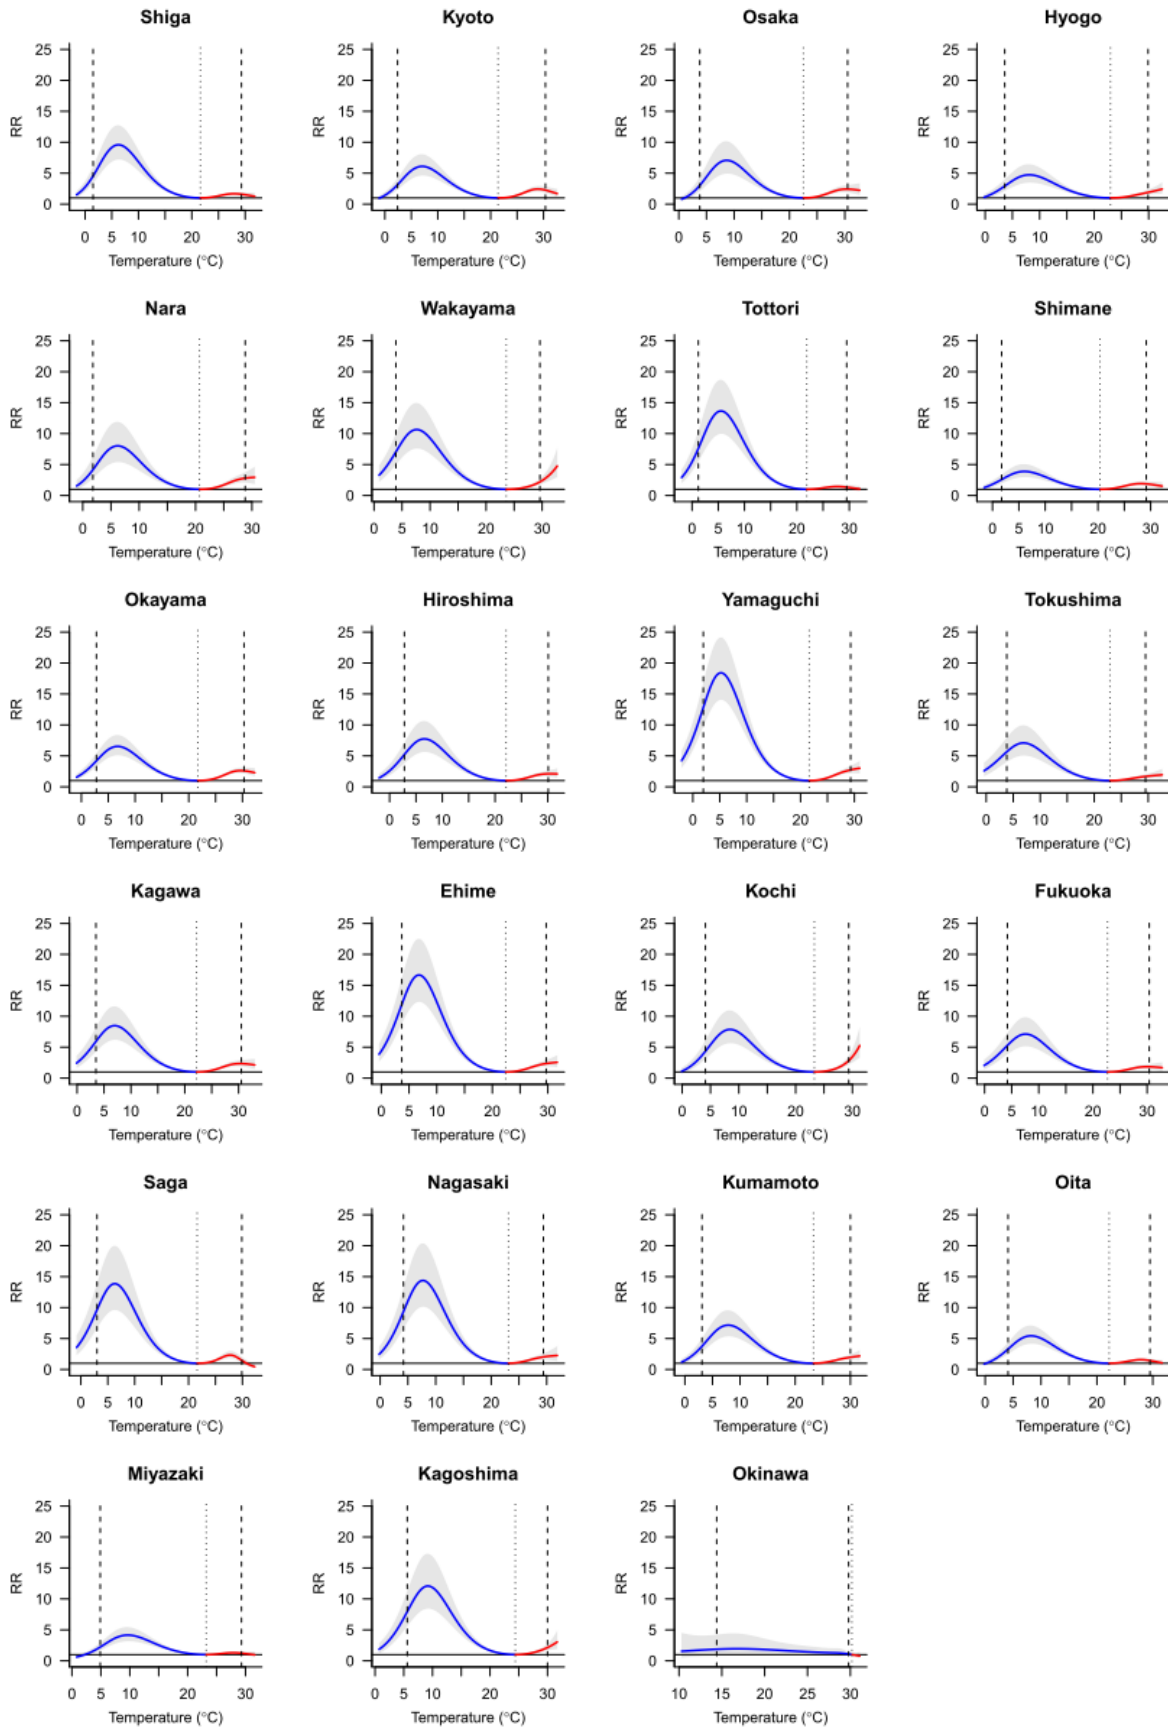

**Table S1.** Descriptive statistics by prefecture.

| Prefecture | Population sizes in 2010 | Total cases in 2005–2015 | Annual mean incidence per 100,000 population | Average weekly temperature, °C |                            |                              |                                     |                                    |
|------------|--------------------------|--------------------------|----------------------------------------------|--------------------------------|----------------------------|------------------------------|-------------------------------------|------------------------------------|
|            |                          |                          |                                              | Annual                         | Spring (from March to May) | Summer (from June to August) | Autumn (from September to November) | Winter (from December to February) |
| Aichi      | 7,410,719                | 620,229                  | 760.8                                        | 16.3 (1.2–30.9)                | 14.7 (4.5–24.4)            | 26.4 (20.3–30.9)             | 18.5 (8.1–29.8)                     | 5.7 (1.2–13.1)                     |
| Akita      | 1,085,997                | 101,871                  | 852.8                                        | 12.2 (-2.7–28.9)               | 9.9 (0.2–20.9)             | 23.2 (17.2–28.9)             | 14.4 (3.6–26.3)                     | 1.1 (-2.7–7.4)                     |
| Aomori     | 1,373,339                | 86,792                   | 574.5                                        | 10.8 (-4.2–27.4)               | 8.5 (-1.1–19.3)            | 21.5 (14.4–27.4)             | 13.4 (1.5–25.6)                     | -0.3 (-4.2–6.8)                    |
| Chiba      | 6,216,289                | 464,951                  | 680.0                                        | 16.4 (2.6–30.2)                | 14.7 (5.5–22.9)            | 25.3 (18.9–30.2)             | 18.5 (8.8–28.5)                     | 6.9 (2.6–12.7)                     |
| Ehime      | 1,431,493                | 189,066                  | 1200.7                                       | 16.8 (3.1–30.6)                | 15.0 (5.7–23.5)            | 26.3 (19.6–30.6)             | 19.0 (8.7–29.1)                     | 6.9 (3.1–12.4)                     |
| Fukui      | 806,314                  | 135,578                  | 1528.6                                       | 14.9 (0.1–30.2)                | 13.0 (2.5–24.2)            | 25.6 (19.4–30.2)             | 17.0 (6.2–28.0)                     | 3.9 (0.1–11.0)                     |
| Fukuoka    | 5,071,968                | 562,221                  | 1007.7                                       | 17.4 (3.1–31.4)                | 15.8 (7.0–24.0)            | 26.7 (20.7–31.4)             | 19.4 (9.3–28.6)                     | 7.7 (3.1–13.0)                     |
| Fukushima  | 2,029,064                | 149,678                  | 670.6                                        | 13.5 (-1.7–30.2)               | 11.9 (1.7–23.9)            | 24.0 (17.0–30.2)             | 15.4 (4.3–27.3)                     | 2.6 (-1.7–7.8)                     |
| Gifu       | 2,080,773                | 122,084                  | 533.4                                        | 16.2 (0.8–31.4)                | 14.6 (4.3–25.0)            | 26.5 (20.3–31.4)             | 18.4 (7.6–29.5)                     | 5.5 (0.8–12.9)                     |
| Gunma      | 2,008,068                | 235,313                  | 1065.3                                       | 15.1 (0.5–30.2)                | 13.7 (3.2–24.7)            | 25.3 (18.8–30.2)             | 17.0 (6.8–28.4)                     | 4.5 (0.5–10.3)                     |
| Hiroshima  | 2,860,750                | 293,064                  | 931.3                                        | 16.5 (1.7–30.9)                | 14.8 (5.4–23.8)            | 26.5 (20.4–30.9)             | 18.6 (7.5–29.3)                     | 6.1 (1.7–11.9)                     |
| Hokkaido   | 5,506,419                | 244,704                  | 404.0                                        | 9.5 (-6.7–26.3)                | 7.5 (-3.3–20.3)            | 20.9 (13.6–26.3)             | 11.8 (-0.4–24.7)                    | -2.2 (-6.7–4.3)                    |
| Hyogo      | 5,588,133                | 544,749                  | 886.2                                        | 17.1 (3.2–31.0)                | 15.1 (5.5–23.8)            | 26.6 (20.6–31.0)             | 19.6 (9.6–29.5)                     | 7.0 (3.2–13.6)                     |
| Ibaraki    | 2,969,770                | 213,780                  | 654.4                                        | 14.2 (0.6–29.3)                | 12.5 (3.7–22.4)            | 23.8 (17.3–29.3)             | 16.4 (6.3–27.2)                     | 4.2 (0.6–10.8)                     |
| Ishikawa   | 1,169,788                | 120,166                  | 933.9                                        | 15.0 (0.4–30.4)                | 12.8 (2.8–24.3)            | 25.3 (19.3–30.4)             | 17.3 (7.0–27.4)                     | 4.6 (0.4–11.1)                     |
| Iwate      | 1,330,147                | 109,305                  | 747.0                                        | 10.7 (-5.4–27.6)               | 9.0 (-1.6–22.0)            | 22.2 (16.4–27.6)             | 12.6 (1.1–25.9)                     | -0.8 (-5.4–5.8)                    |
| Kagawa     | 995,842                  | 114,591                  | 1046.1                                       | 16.8 (2.9–31.9)                | 15.0 (5.6–24.0)            | 26.8 (20.3–31.9)             | 18.9 (9.1–30.1)                     | 6.5 (2.9–12.4)                     |
| Kagoshima  | 1,706,242                | 240,666                  | 1282.3                                       | 18.8 (4.6–30.6)                | 17.2 (8.6–23.7)            | 27.2 (21.9–30.6)             | 21.2 (10.5–29.0)                    | 9.7 (4.6–15.8)                     |
| Kanagawa   | 9,048,331                | 763,804                  | 767.4                                        | 16.3 (3.2–30.2)                | 14.7 (5.4–22.8)            | 25.2 (19.1–30.2)             | 18.5 (8.9–28.2)                     | 6.9 (3.2–12.5)                     |
| Kochi      | 764,456                  | 99,461                   | 1182.8                                       | 17.4 (3.0–30.3)                | 16.0 (7.2–23.0)            | 26.3 (21.1–30.3)             | 19.6 (8.6–28.9)                     | 7.7 (3.0–14.8)                     |
| Kumamoto   | 1,817,426                | 241,297                  | 1207.0                                       | 17.3 (2.1–30.5)                | 16.1 (6.6–24.3)            | 26.8 (21.2–30.5)             | 19.3 (8.4–29.0)                     | 7.0 (2.1–14.2)                     |
| Kyoto      | 2,636,092                | 240,050                  | 827.8                                        | 16.2 (1.9–31.4)                | 14.4 (4.4–25.4)            | 26.6 (20.1–31.4)             | 18.2 (7.7–29.2)                     | 5.6 (1.9–12.4)                     |
| Mie        | 1,854,724                | 207,269                  | 1015.9                                       | 16.4 (2.7–31.4)                | 14.3 (4.9–23.4)            | 26.1 (19.9–31.4)             | 18.6 (8.8–29.3)                     | 6.4 (2.7–13.4)                     |
| Miyagi     | 2,348,165                | 247,320                  | 957.5                                        | 12.9 (-1.7–28.7)               | 10.8 (1.4–21.1)            | 22.7 (16.3–28.7)             | 15.4 (4.7–26.2)                     | 2.7 (-1.7–9.3)                     |
| Miyazaki   | 1,135,233                | 230,533                  | 1846.1                                       | 17.7 (4.4–30.5)                | 16.4 (8.3–22.8)            | 26.2 (20.1–30.5)             | 19.6 (9.8–27.5)                     | 8.6 (4.4–14.7)                     |
| Nagano     | 2,152,449                | 206,981                  | 874.2                                        | 12.3 (-3.7–28.2)               | 10.8 (-0.8–22.5)           | 23.7 (17.5–28.2)             | 14.3 (3.3–26.1)                     | 0.6 (-3.7–8.2)                     |
| Nagasaki   | 1,426,779                | 157,175                  | 1001.5                                       | 17.4 (3.4–30.2)                | 15.7 (7.4–22.9)            | 26.2 (20.8–30.2)             | 19.7 (9.5–28.5)                     | 8.0 (3.4–13.9)                     |

|           |            |         |        |                  |                  |                  |                  |                  |
|-----------|------------|---------|--------|------------------|------------------|------------------|------------------|------------------|
| Nara      | 1,400,728  | 100,896 | 654.8  | 15.2 (1.4–29.7)  | 13.5 (3.9–23.5)  | 25.4 (18.8–29.7) | 16.9 (6.9–27.8)  | 4.8 (1.4–11.5)   |
| Niigata   | 2,374,450  | 207,904 | 796.0  | 14.1 (-0.2–29.9) | 11.8 (2.0–22.8)  | 24.6 (18.8–29.9) | 16.6 (6.3–27.0)  | 3.6 (-0.2–9.5)   |
| Oita      | 1,196,529  | 247,221 | 1878.3 | 16.9 (3.2–30.8)  | 15.2 (6.7–22.8)  | 26.0 (20.0–30.8) | 19.0 (9.3–28.5)  | 7.3 (3.2–12.7)   |
| Okayama   | 1,945,276  | 225,919 | 1055.8 | 16.5 (2.5–31.0)  | 14.8 (5.2–24.5)  | 26.8 (19.8–31.0) | 18.5 (7.6–30.1)  | 5.9 (2.5–11.8)   |
| Okinawa   | 1,392,818  | 53,377  | 348.4  | 23.3 (14.0–30.4) | 21.6 (15.9–27.3) | 28.5 (24.5–30.4) | 25.3 (17.6–29.7) | 17.8 (14.0–22.2) |
| Osaka     | 8,865,245  | 724,780 | 743.2  | 17.1 (3.0–31.5)  | 15.3 (5.6–24.4)  | 27.0 (20.5–31.5) | 19.3 (9.4–30.2)  | 6.9 (3.0–13.2)   |
| Saga      | 849,788    | 73,260  | 783.7  | 17.0 (2.0–30.9)  | 15.6 (6.4–24.3)  | 26.6 (21.4–30.9) | 18.9 (8.3–28.5)  | 6.7 (2.0–13.0)   |
| Saitama   | 7,194,556  | 686,222 | 867.1  | 15.6 (1.4–30.5)  | 14.2 (4.1–24.3)  | 25.6 (18.9–30.5) | 17.4 (7.1–29.0)  | 5.1 (1.4–10.6)   |
| Shiga     | 1,410,777  | 112,451 | 724.6  | 15.1 (0.8–29.9)  | 12.7 (3.0–23.1)  | 25.5 (19.0–29.9) | 17.5 (7.4–28.2)  | 4.7 (0.8–11.7)   |
| Shimane   | 717,397    | 107,173 | 1358.1 | 15.3 (1.6–30.1)  | 13.4 (3.8–23.7)  | 25.2 (18.9–30.1) | 17.3 (7.3–28.0)  | 5.2 (1.6–10.3)   |
| Shizuoka  | 3,765,007  | 333,550 | 805.4  | 16.9 (3.7–29.5)  | 15.3 (6.4–23.0)  | 25.5 (20.3–29.5) | 19.2 (9.6–28.3)  | 7.8 (3.7–14.2)   |
| Tochigi   | 2,007,683  | 109,203 | 494.5  | 14.5 (0.2–29.2)  | 13.1 (3.1–24.1)  | 24.4 (18.1–29.2) | 16.5 (5.7–27.5)  | 3.8 (0.2–10.6)   |
| Tokushima | 785,491    | 85,176  | 985.8  | 16.9 (3.4–30.9)  | 15.1 (5.9–23.1)  | 26.2 (20.7–30.9) | 19.1 (9.1–29.3)  | 7.0 (3.4–12.9)   |
| Tokyo     | 13,159,388 | 799,377 | 552.2  | 16.7 (3.3–31.1)  | 15.1 (5.7–24.5)  | 25.9 (19.3–31.1) | 18.8 (9.2–29.0)  | 6.9 (3.3–12.1)   |
| Tottori   | 588,667    | 78,700  | 1215.4 | 15.2 (1.0–30.4)  | 13.3 (3.9–24.0)  | 25.5 (19.1–30.4) | 17.2 (7.3–28.4)  | 4.9 (1.0–11.3)   |
| Toyama    | 1,093,247  | 136,660 | 1136.4 | 14.6 (-0.3–30.2) | 12.6 (2.0–23.9)  | 25.1 (19.2–30.2) | 16.9 (6.6–27.4)  | 3.7 (-0.3–10.7)  |
| Wakayama  | 1,002,198  | 87,154  | 790.6  | 16.9 (3.3–31.1)  | 15.2 (5.9–23.5)  | 26.5 (20.6–31.1) | 19.1 (9.4–29.3)  | 7.0 (3.3–13.2)   |
| Yamagata  | 1,168,924  | 126,337 | 982.5  | 12.1 (-3.3–28.7) | 10.4 (-0.6–23.0) | 23.5 (17.8–28.7) | 13.9 (2.4–25.7)  | 0.5 (-3.3–7.1)   |
| Yamaguchi | 1,451,338  | 223,188 | 1398.0 | 15.8 (1.1–30.5)  | 14.3 (4.8–22.8)  | 25.8 (20.0–30.5) | 17.7 (6.6–28.0)  | 5.4 (1.1–11.7)   |
| Yamanashi | 863,075    | 68,587  | 722.4  | 15.2 (0.1–30.1)  | 14.1 (3.3–23.9)  | 25.4 (19.5–30.1) | 16.9 (6.6–28.0)  | 4.3 (0.1–11.1)   |

**Table S2.** Heat-related, cold-related, and net change in excess morbidity in diarrhea (%) with 95% eCI by prefecture and period under the RCP2.6 scenario. Heat-related and cold-related morbidity were estimated using a two-stage time series regression model with quasi-Poisson family (Gasparri et al. 2017; Vicedo-Cabrera et al. 2019). Estimates are presented as GCM-ensemble average decadal fractions. GCM=general circulation model; RCP=representative concentration pathway.

|           |      | RCP2.6            |                   |                   |
|-----------|------|-------------------|-------------------|-------------------|
|           |      | 2010–2019         | 2050–2059         | 2090–2099         |
| Aichi     | Heat | 6.8 (5.5, 7.9)    | 7.6 (5.9, 9.2)    | 7.4 (5.9, 8.7)    |
|           | Cold | 65.3 (59.0, 69.4) | 63.6 (56.9, 68.4) | 64.0 (57.6, 68.4) |
|           | Net  | -                 | -0.9 (-2.4, 0.3)  | -0.7 (-1.9, 0.2)  |
| Akita     | Heat | 5.8 (4.4, 6.9)    | 6.6 (5.0, 8.0)    | 6.3 (4.5, 7.7)    |
|           | Cold | 68.1 (62.3, 71.7) | 66.3 (60.1, 70.6) | 67.1 (61.1, 72.7) |
|           | Net  | -                 | -0.9 (-2.8, 0.2)  | -0.4 (-1.6, 1.7)  |
| Aomori    | Heat | 4.0 (2.4, 5.4)    | 4.7 (2.8, 6.2)    | 4.4 (2.4, 6.0)    |
|           | Cold | 70.2 (61.6, 75.1) | 68.5 (59.3, 73.9) | 69.5 (60.5, 76.4) |
|           | Net  | -                 | -1.1 (-3.3, 0.1)  | -0.4 (-1.8, 2.2)  |
| Chiba     | Heat | 6.0 (5.0, 7.0)    | 6.9 (5.5, 8.2)    | 6.6 (5.4, 7.6)    |
|           | Cold | 71.8 (68.5, 74.2) | 69.8 (65.0, 73.6) | 70.7 (66.9, 74.0) |
|           | Net  | -                 | -1.2 (-3.2, 0.3)  | -0.6 (-2.2, 1.2)  |
| Ehime     | Heat | 6.5 (5.3, 7.4)    | 7.3 (5.9, 8.6)    | 7.1 (5.9, 8.1)    |
|           | Cold | 64.9 (59.3, 68.6) | 63.0 (56.8, 67.6) | 63.3 (57.4, 67.5) |
|           | Net  | -                 | -1.0 (-3.0, 0.4)  | -1.0 (-2.4, 0.1)  |
| Fukui     | Heat | 5.6 (4.4, 6.6)    | 6.3 (4.8, 7.5)    | 6.1 (4.7, 7.2)    |
|           | Cold | 59.4 (52.6, 64.2) | 57.9 (50.6, 63.2) | 58.1 (51.0, 63.1) |
|           | Net  | -                 | -0.9 (-3.1, 0.7)  | -0.9 (-2.4, 0.2)  |
| Fukuoka   | Heat | 5.5 (4.1, 6.8)    | 6.3 (4.6, 8.2)    | 6.1 (4.5, 7.6)    |
|           | Cold | 52.6 (43.4, 59.5) | 50.4 (40.6, 57.7) | 51.0 (41.4, 58.1) |
|           | Net  | -                 | -1.4 (-3.4, 0.0)  | -1.0 (-2.7, 0.7)  |
| Fukushima | Heat | 5.6 (4.4, 6.6)    | 6.4 (5.0, 7.9)    | 6.1 (4.7, 7.3)    |
|           | Cold | 67.1 (61.6, 70.7) | 65.3 (59.2, 69.5) | 66.2 (60.5, 71.3) |
|           | Net  | -                 | -1.0 (-2.5, 0.2)  | -0.4 (-2.1, 1.8)  |
| Gifu      | Heat | 6.1 (4.8, 7.3)    | 6.9 (5.2, 8.5)    | 6.7 (5.1, 8.1)    |
|           | Cold | 59.7 (50.7, 65.7) | 57.9 (48.8, 64.5) | 58.4 (49.4, 64.5) |
|           | Net  | -                 | -1.0 (-2.6, 0.3)  | -0.8 (-2.0, 0.3)  |
| Gunma     | Heat | 6.2 (5.2, 7.1)    | 7.0 (5.7, 8.4)    | 6.8 (5.6, 7.9)    |

|           |      |                   |                   |                   |
|-----------|------|-------------------|-------------------|-------------------|
|           | Cold | 67.9 (63.8, 70.8) | 66.2 (61.2, 69.9) | 66.7 (62.6, 70.1) |
|           | Net  | -                 | -0.9 (-2.4, 0.3)  | -0.6 (-1.9, 0.7)  |
| Hiroshima | Heat | 5.7 (4.4, 6.8)    | 6.4 (5.0, 7.8)    | 6.2 (4.9, 7.4)    |
|           | Cold | 56.8 (48.2, 62.5) | 55.1 (46.3, 61.4) | 55.4 (46.8, 61.4) |
|           | Net  | -                 | -1.0 (-3.1, 0.4)  | -0.9 (-2.2, 0.2)  |
| Hokkaido  | Heat | 4.6 (1.6, 6.7)    | 5.4 (2.0, 8.0)    | 5.3 (1.9, 7.8)    |
|           | Cold | 57.5 (44.2, 64.8) | 55.6 (42.8, 63.3) | 55.9 (42.6, 64.3) |
|           | Net  | -                 | -1.0 (-3.1, 0.5)  | -0.9 (-2.8, 1.8)  |
| Hyogo     | Heat | 5.2 (3.8, 6.3)    | 6.1 (4.3, 7.7)    | 5.8 (4.2, 7.1)    |
|           | Cold | 52.9 (43.5, 59.2) | 50.9 (41.3, 57.9) | 51.3 (41.8, 57.9) |
|           | Net  | -                 | -1.1 (-2.8, 0.3)  | -1.0 (-2.5, 0.1)  |
| Ibaraki   | Heat | 4.5 (3.2, 5.7)    | 5.2 (3.6, 6.8)    | 5.0 (3.4, 6.3)    |
|           | Cold | 66.7 (61.1, 70.5) | 65.0 (58.9, 69.6) | 65.8 (60.0, 70.1) |
|           | Net  | -                 | -1.0 (-2.9, 0.4)  | -0.5 (-2.0, 1.2)  |
| Ishikawa  | Heat | 4.8 (3.8, 5.8)    | 5.5 (4.2, 6.9)    | 5.3 (4.1, 6.3)    |
|           | Cold | 61.7 (54.2, 66.8) | 59.6 (51.7, 65.3) | 60.3 (52.5, 66.1) |
|           | Net  | -                 | -1.4 (-3.3, -0.0) | -0.9 (-2.8, 0.9)  |
| Iwate     | Heat | 5.8 (4.2, 7.1)    | 6.6 (4.9, 8.2)    | 6.3 (4.2, 7.9)    |
|           | Cold | 67.9 (61.2, 72.0) | 66.3 (59.2, 70.9) | 67.3 (60.3, 73.2) |
|           | Net  | -                 | -0.8 (-2.4, 0.2)  | -0.1 (-1.4, 2.0)  |
| Kagawa    | Heat | 6.1 (4.8, 7.3)    | 6.9 (5.2, 8.3)    | 6.6 (5.1, 7.9)    |
|           | Cold | 56.1 (46.7, 62.1) | 54.2 (44.6, 61.0) | 54.5 (45.1, 60.8) |
|           | Net  | -                 | -1.2 (-3.2, 0.3)  | -1.1 (-2.6, 0.0)  |
| Kagoshima | Heat | 6.5 (5.2, 7.7)    | 7.6 (5.7, 9.2)    | 7.2 (5.7, 8.5)    |
|           | Cold | 59.8 (52.8, 64.5) | 57.3 (49.4, 63.6) | 58.3 (51.0, 63.6) |
|           | Net  | -                 | -1.5 (-3.9, 0.4)  | -0.8 (-3.0, 1.2)  |
| Kanagawa  | Heat | 5.8 (4.5, 6.8)    | 6.5 (5.0, 7.8)    | 6.3 (5.0, 7.4)    |
|           | Cold | 71.2 (67.1, 74.0) | 69.5 (64.5, 73.2) | 69.7 (65.2, 73.1) |
|           | Net  | -                 | -1.0 (-3.0, 0.4)  | -1.0 (-2.2, -0.1) |
| Kochi     | Heat | 4.7 (3.5, 5.6)    | 5.3 (3.9, 6.5)    | 5.2 (3.8, 6.2)    |
|           | Cold | 63.1 (54.9, 68.3) | 61.1 (52.5, 67.1) | 61.4 (53.0, 67.1) |
|           | Net  | -                 | -1.3 (-3.6, 0.5)  | -1.1 (-3.0, 0.2)  |
| Kumamoto  | Heat | 5.8 (4.3, 7.0)    | 6.6 (4.9, 8.0)    | 6.4 (4.8, 7.7)    |
|           | Cold | 52.3 (42.6, 58.8) | 50.5 (40.7, 57.8) | 50.9 (41.3, 57.5) |
|           | Net  | -                 | -1.0 (-2.9, 0.6)  | -0.8 (-2.2, 0.3)  |
| Kyoto     | Heat | 6.5 (5.3, 7.7)    | 7.3 (5.7, 8.9)    | 7.1 (5.7, 8.4)    |
|           | Cold | 56.9 (49.4, 62.2) | 55.0 (47.2, 60.9) | 55.3 (47.9, 60.9) |
|           | Net  | -                 | -1.1 (-2.8, 0.3)  | -1.0 (-2.3, -0.0) |
| Mie       | Heat | 6.2 (5.1, 7.2)    | 7.0 (5.5, 8.3)    | 6.8 (5.6, 8.0)    |
|           | Cold | 64.8 (59.7, 68.6) | 63.0 (57.1, 67.7) | 63.4 (58.1, 67.5) |
|           | Net  | -                 | -1.0 (-2.8, 0.3)  | -0.9 (-2.2, -0.0) |

|          |      |                   |                   |                   |
|----------|------|-------------------|-------------------|-------------------|
| Miyagi   | Heat | 5.3 (3.9, 6.5)    | 6.1 (4.5, 7.7)    | 5.8 (4.0, 7.2)    |
|          | Cold | 68.5 (63.8, 71.8) | 66.7 (61.0, 70.7) | 67.8 (62.7, 72.9) |
|          | Net  | -                 | -1.0 (-2.8, 0.3)  | -0.2 (-1.8, 2.1)  |
| Miyazaki | Heat | 3.4 (1.8, 4.7)    | 3.9 (1.9, 5.5)    | 3.8 (1.8, 5.2)    |
|          | Cold | 48.6 (37.2, 56.4) | 46.7 (35.2, 55.0) | 47.1 (35.8, 54.9) |
|          | Net  | -                 | -1.4 (-3.7, 0.5)  | -1.1 (-2.9, 0.1)  |
| Nagano   | Heat | 6.1 (4.7, 7.4)    | 7.0 (5.3, 8.9)    | 6.7 (5.1, 8.2)    |
|          | Cold | 59.4 (51.9, 64.7) | 57.8 (50.2, 63.3) | 58.3 (50.8, 63.7) |
|          | Net  | -                 | -0.7 (-2.0, 0.2)  | -0.5 (-2.1, 0.8)  |
| Nagasaki | Heat | 4.9 (3.8, 5.8)    | 5.7 (4.2, 7.1)    | 5.4 (4.2, 6.5)    |
|          | Cold | 65.4 (58.0, 70.3) | 63.1 (54.9, 69.1) | 63.7 (55.9, 69.0) |
|          | Net  | -                 | -1.5 (-3.6, 0.2)  | -1.2 (-2.8, 0.1)  |
| Nara     | Heat | 5.4 (4.2, 6.4)    | 6.1 (4.7, 7.3)    | 6.0 (4.7, 7.0)    |
|          | Cold | 64.8 (58.6, 69.0) | 63.0 (56.2, 68.0) | 63.3 (56.7, 67.8) |
|          | Net  | -                 | -1.1 (-3.1, 0.6)  | -1.0 (-2.5, -0.1) |
| Niigata  | Heat | 4.7 (3.8, 5.5)    | 5.4 (4.3, 6.6)    | 5.2 (4.1, 6.1)    |
|          | Cold | 68.8 (63.3, 72.5) | 66.5 (60.0, 70.9) | 67.4 (61.6, 72.7) |
|          | Net  | -                 | -1.6 (-3.8, -0.0) | -0.9 (-2.9, 1.4)  |
| Oita     | Heat | 5.2 (3.6, 6.6)    | 5.9 (4.0, 7.6)    | 5.7 (3.9, 7.2)    |
|          | Cold | 51.5 (42.3, 57.8) | 49.7 (40.3, 56.5) | 50.0 (40.8, 56.5) |
|          | Net  | -                 | -1.1 (-3.4, 0.4)  | -1.0 (-2.4, 0.2)  |
| Okayama  | Heat | 6.4 (5.2, 7.4)    | 7.2 (5.6, 8.7)    | 6.9 (5.6, 8.0)    |
|          | Cold | 55.8 (49.2, 60.5) | 54.1 (47.1, 59.5) | 54.4 (47.8, 59.4) |
|          | Net  | -                 | -0.9 (-2.7, 0.3)  | -0.8 (-2.0, 0.1)  |
| Okinawa  | Heat | -3.9 (-28.3, 2.7) | -6.4 (-52.5, 4.3) | -6.2 (-48.0, 4.2) |
|          | Cold | 41.5 (-1.5, 60.1) | 39.3 (-2.6, 58.1) | 39.8 (-1.7, 58.1) |
|          | Net  | -                 | -4.8 (-28.6, 1.1) | -4.0 (-23.9, 1.0) |
| Osaka    | Heat | 6.5 (4.9, 7.8)    | 7.3 (5.4, 9.1)    | 7.1 (5.3, 8.6)    |
|          | Cold | 57.2 (49.0, 63.0) | 55.3 (46.7, 61.7) | 55.6 (47.2, 61.6) |
|          | Net  | -                 | -1.1 (-3.0, 0.4)  | -1.0 (-2.5, -0.0) |
| Saga     | Heat | 4.2 (3.4, 4.9)    | 4.7 (3.8, 5.6)    | 4.6 (3.7, 5.3)    |
|          | Cold | 67.6 (58.7, 73.1) | 65.4 (55.9, 72.0) | 65.9 (56.6, 71.8) |
|          | Net  | -                 | -1.7 (-4.4, 0.3)  | -1.3 (-3.0, 0.2)  |
| Saitama  | Heat | 6.8 (5.8, 7.6)    | 7.6 (6.3, 8.9)    | 7.4 (6.2, 8.3)    |
|          | Cold | 70.0 (66.6, 72.4) | 68.2 (63.8, 71.7) | 68.8 (65.2, 71.9) |
|          | Net  | -                 | -0.9 (-2.5, 0.4)  | -0.6 (-1.8, 0.8)  |
| Shiga    | Heat | 6.1 (4.9, 7.1)    | 7.0 (5.4, 8.5)    | 6.7 (5.3, 7.9)    |
|          | Cold | 64.1 (58.7, 68.0) | 62.2 (56.0, 66.8) | 62.6 (56.8, 66.9) |
|          | Net  | -                 | -1.0 (-2.8, 0.2)  | -1.0 (-2.5, 0.1)  |
| Shimane  | Heat | 5.3 (3.6, 6.7)    | 6.1 (4.1, 7.9)    | 5.8 (4.0, 7.3)    |
|          | Cold | 49.4 (39.1, 56.2) | 47.4 (36.9, 54.8) | 47.8 (37.5, 55.0) |

|           |      |                   |                   |                   |
|-----------|------|-------------------|-------------------|-------------------|
| Shizuoka  | Net  | -                 | -1.2 (-3.2, 0.1)  | -1.0 (-2.7, 0.3)  |
|           | Heat | 6.3 (4.9, 7.5)    | 7.4 (5.5, 9.1)    | 7.0 (5.4, 8.4)    |
|           | Cold | 68.0 (63.8, 70.9) | 65.9 (60.6, 70.2) | 66.5 (62.1, 69.9) |
| Tochigi   | Net  | -                 | -1.0 (-2.9, 0.4)  | -0.7 (-2.0, 0.3)  |
|           | Heat | 4.2 (3.3, 5.0)    | 4.8 (3.7, 5.9)    | 4.6 (3.6, 5.5)    |
|           | Cold | 72.3 (67.2, 75.6) | 70.9 (65.3, 74.8) | 71.1 (65.9, 74.7) |
| Tokushima | Net  | -                 | -0.8 (-2.2, 0.3)  | -0.8 (-1.9, -0.1) |
|           | Heat | 5.4 (4.1, 6.6)    | 6.2 (4.5, 7.8)    | 5.9 (4.4, 7.3)    |
|           | Cold | 60.0 (52.6, 65.3) | 57.8 (50.0, 63.8) | 58.7 (51.3, 64.6) |
| Tokyo     | Net  | -                 | -1.4 (-3.3, 0.2)  | -0.7 (-2.5, 1.4)  |
|           | Heat | 6.2 (3.2, 8.3)    | 7.1 (3.5, 9.5)    | 6.8 (3.5, 9.1)    |
|           | Cold | 68.3 (56.1, 73.7) | 66.7 (54.9, 72.7) | 67.4 (55.5, 72.9) |
| Tottori   | Net  | -                 | -0.8 (-3.1, 0.7)  | -0.4 (-1.9, 1.3)  |
|           | Heat | 6.4 (4.9, 7.6)    | 7.3 (5.5, 9.1)    | 7.0 (5.4, 8.4)    |
|           | Cold | 58.5 (50.8, 63.5) | 56.3 (48.0, 62.1) | 56.9 (49.1, 62.7) |
| Toyama    | Net  | -                 | -1.3 (-3.2, 0.1)  | -0.9 (-2.8, 0.8)  |
|           | Heat | 6.4 (5.4, 7.3)    | 7.2 (5.9, 8.7)    | 7.0 (5.8, 8.0)    |
|           | Cold | 65.7 (60.7, 69.2) | 63.8 (58.0, 68.0) | 64.2 (58.7, 68.5) |
| Wakayama  | Net  | -                 | -1.1 (-2.9, 0.1)  | -0.9 (-2.5, 0.3)  |
|           | Heat | 4.2 (3.0, 5.4)    | 4.9 (3.4, 6.4)    | 4.7 (3.3, 6.0)    |
|           | Cold | 56.8 (45.6, 64.2) | 54.8 (43.8, 62.7) | 55.2 (44.1, 62.8) |
| Yamagata  | Net  | -                 | -1.3 (-3.2, 0.3)  | -1.1 (-2.8, 0.1)  |
|           | Heat | 5.2 (3.9, 6.3)    | 5.9 (4.4, 7.4)    | 5.7 (4.3, 6.9)    |
|           | Cold | 65.1 (57.7, 69.7) | 63.5 (55.7, 68.5) | 63.7 (56.1, 68.7) |
| Yamaguchi | Net  | -                 | -0.9 (-3.0, 0.4)  | -0.9 (-2.2, 0.1)  |
|           | Heat | 6.5 (5.4, 7.4)    | 7.3 (6.0, 8.8)    | 7.1 (5.6, 8.3)    |
|           | Cold | 64.5 (59.2, 68.2) | 62.4 (56.3, 67.0) | 63.5 (57.8, 68.8) |
| Yamanashi | Net  | -                 | -1.2 (-3.0, 0.2)  | -0.4 (-2.0, 1.9)  |
|           | Heat | 5.0 (3.8, 6.2)    | 5.7 (4.2, 7.2)    | 5.5 (4.2, 6.8)    |
|           | Cold | 57.2 (47.9, 63.8) | 55.4 (46.1, 62.6) | 56.0 (46.9, 62.7) |
|           | Net  | -                 | -1.0 (-2.5, 0.4)  | -0.7 (-2.2, 0.5)  |

---

**Table S3.** Heat-related, cold-related, and net change in excess morbidity in diarrhea (%) with 95% eCI by prefecture and period under the RCP4.5 scenario. Heat-related and cold-related morbidity were estimated using a two-stage time series regression model with quasi-Poisson family (Gasparrini et al. 2017; Vicedo-Cabrera et al. 2019). Estimates are presented as GCM-ensemble average decadal fractions. GCM=general circulation model; RCP=representative concentration pathway.

|           |      | RCP4.5            |                   |                   |
|-----------|------|-------------------|-------------------|-------------------|
|           |      | 2010–2019         | 2050–2059         | 2090–2099         |
| Aichi     | Heat | 6.7 (5.4, 7.8)    | 8.1 (6.5, 9.4)    | 8.5 (6.7, 9.9)    |
|           | Cold | 65.6 (59.3, 69.7) | 62.5 (56.2, 67.2) | 60.6 (54.1, 65.3) |
|           | Net  | -                 | -1.6 (-3.1, 0.7)  | -3.2 (-4.9, -1.4) |
| Akita     | Heat | 5.6 (4.2, 6.7)    | 7.0 (5.3, 8.4)    | 7.3 (5.5, 8.8)    |
|           | Cold | 68.3 (62.5, 72.1) | 64.9 (58.8, 69.2) | 62.9 (56.5, 67.7) |
|           | Net  | -                 | -2.0 (-3.7, 0.2)  | -3.7 (-6.1, -1.3) |
| Aomori    | Heat | 3.8 (2.3, 5.1)    | 5.1 (3.1, 6.6)    | 5.3 (3.2, 6.9)    |
|           | Cold | 70.4 (61.6, 75.5) | 66.9 (57.9, 72.5) | 64.8 (55.7, 71.1) |
|           | Net  | -                 | -2.3 (-4.3, 0.5)  | -4.1 (-6.8, -1.0) |
| Chiba     | Heat | 5.9 (4.9, 6.9)    | 7.4 (6.1, 8.6)    | 7.8 (6.3, 9.1)    |
|           | Cold | 72.1 (68.7, 74.4) | 68.7 (64.6, 72.0) | 66.5 (62.0, 70.3) |
|           | Net  | -                 | -2.0 (-3.6, -0.2) | -3.8 (-6.1, -1.7) |
| Ehime     | Heat | 6.3 (5.2, 7.3)    | 7.8 (6.4, 8.9)    | 8.2 (6.5, 9.4)    |
|           | Cold | 65.3 (59.7, 69.2) | 61.6 (55.9, 65.9) | 59.6 (53.6, 64.2) |
|           | Net  | -                 | -2.2 (-3.5, -0.5) | -3.9 (-5.8, -2.1) |
| Fukui     | Heat | 5.5 (4.3, 6.5)    | 6.5 (5.0, 7.7)    | 6.8 (5.1, 8.1)    |
|           | Cold | 60.0 (52.9, 64.9) | 56.6 (49.8, 61.6) | 54.9 (47.9, 60.3) |
|           | Net  | -                 | -2.4 (-3.8, -0.4) | -3.8 (-5.8, -1.6) |
| Fukuoka   | Heat | 5.3 (4.0, 6.5)    | 6.7 (5.0, 8.3)    | 7.1 (5.1, 8.9)    |
|           | Cold | 52.8 (43.3, 59.6) | 48.9 (39.4, 56.1) | 46.4 (37.0, 54.1) |
|           | Net  | -                 | -2.5 (-4.4, -0.0) | -4.6 (-7.1, -2.0) |
| Fukushima | Heat | 5.4 (4.3, 6.4)    | 6.7 (5.3, 8.0)    | 7.1 (5.5, 8.5)    |
|           | Cold | 67.3 (61.8, 71.0) | 64.3 (58.4, 68.5) | 62.3 (56.3, 66.8) |
|           | Net  | -                 | -1.8 (-3.6, 0.3)  | -3.4 (-5.5, -1.5) |
| Gifu      | Heat | 6.1 (4.7, 7.2)    | 7.3 (5.6, 8.8)    | 7.7 (5.8, 9.2)    |
|           | Cold | 59.9 (50.8, 66.0) | 56.8 (47.9, 63.1) | 54.8 (46.0, 61.2) |
|           | Net  | -                 | -1.8 (-3.3, 0.5)  | -3.4 (-5.2, -1.5) |
| Gunma     | Heat | 6.1 (5.1, 7.0)    | 7.5 (6.2, 8.7)    | 7.8 (6.4, 9.1)    |



|           |      |                   |                   |                   |
|-----------|------|-------------------|-------------------|-------------------|
|           | Cold | 68.1 (64.1, 71.0) | 65.1 (60.7, 68.7) | 63.1 (58.5, 67.1) |
|           | Net  | -                 | -1.7 (-3.2, 0.4)  | -3.3 (-5.3, -1.4) |
| Hiroshima | Heat | 5.5 (4.3, 6.6)    | 6.8 (5.3, 8.0)    | 7.1 (5.4, 8.5)    |
|           | Cold | 57.2 (48.6, 63.0) | 53.8 (45.4, 59.8) | 51.9 (43.3, 58.3) |
|           | Net  | -                 | -2.1 (-3.4, -0.5) | -3.7 (-5.7, -1.7) |
| Hokkaido  | Heat | 4.3 (1.5, 6.4)    | 5.9 (2.3, 8.6)    | 6.4 (2.4, 9.2)    |
|           | Cold | 57.5 (44.1, 65.0) | 53.6 (41.0, 61.6) | 51.5 (39.0, 59.6) |
|           | Net  | -                 | -2.2 (-4.6, 1.2)  | -3.9 (-7.0, -0.8) |
| Hyogo     | Heat | 5.1 (3.7, 6.2)    | 6.5 (4.8, 7.9)    | 6.9 (4.9, 8.5)    |
|           | Cold | 53.2 (43.8, 59.7) | 49.6 (40.2, 56.3) | 47.5 (38.2, 54.3) |
|           | Net  | -                 | -2.2 (-3.7, -0.2) | -3.9 (-5.8, -1.8) |
| Ibaraki   | Heat | 4.4 (3.1, 5.6)    | 5.6 (3.9, 7.1)    | 6.0 (4.1, 7.6)    |
|           | Cold | 66.9 (61.2, 70.7) | 64.0 (58.2, 68.3) | 62.1 (56.1, 66.8) |
|           | Net  | -                 | -1.7 (-3.5, 0.3)  | -3.3 (-5.6, -1.3) |
| Ishikawa  | Heat | 4.7 (3.7, 5.5)    | 5.8 (4.5, 6.9)    | 6.1 (4.6, 7.3)    |
|           | Cold | 61.9 (54.2, 67.1) | 58.2 (50.6, 64.0) | 55.9 (48.1, 62.1) |
|           | Net  | -                 | -2.5 (-4.3, 0.0)  | -4.6 (-6.7, -1.9) |
| Iwate     | Heat | 5.6 (4.1, 6.9)    | 7.1 (5.2, 8.6)    | 7.4 (5.4, 9.2)    |
|           | Cold | 68.2 (61.2, 72.4) | 65.1 (57.9, 69.6) | 63.2 (55.9, 68.6) |
|           | Net  | -                 | -1.6 (-3.3, 0.1)  | -3.2 (-5.4, -0.4) |
| Kagawa    | Heat | 6.0 (4.7, 7.2)    | 7.2 (5.6, 8.6)    | 7.6 (5.7, 9.1)    |
|           | Cold | 56.5 (46.9, 62.6) | 52.8 (43.5, 59.2) | 50.7 (41.4, 57.4) |
|           | Net  | -                 | -2.5 (-3.9, -0.3) | -4.2 (-6.1, -2.0) |
| Kagoshima | Heat | 6.4 (5.1, 7.6)    | 8.3 (6.5, 9.8)    | 8.8 (6.8, 10.5)   |
|           | Cold | 60.1 (53.1, 64.9) | 55.8 (48.4, 61.4) | 53.3 (45.5, 59.4) |
|           | Net  | -                 | -2.5 (-4.1, -0.4) | -4.4 (-6.9, -1.6) |
| Kanagawa  | Heat | 5.7 (4.5, 6.7)    | 6.9 (5.4, 8.1)    | 7.2 (5.5, 8.6)    |
|           | Cold | 71.6 (67.4, 74.6) | 68.1 (63.7, 71.5) | 66.0 (61.3, 69.9) |
|           | Net  | -                 | -2.2 (-3.6, -0.2) | -4.0 (-6.0, -2.0) |
| Kochi     | Heat | 4.6 (3.4, 5.5)    | 5.6 (4.1, 6.7)    | 5.9 (4.2, 7.1)    |
|           | Cold | 63.6 (55.4, 69.0) | 59.8 (51.6, 65.3) | 57.5 (49.1, 63.5) |
|           | Net  | -                 | -2.9 (-4.5, -1.0) | -4.8 (-7.1, -2.5) |
| Kumamoto  | Heat | 5.7 (4.3, 6.9)    | 7.0 (5.1, 8.4)    | 7.4 (5.4, 8.9)    |
|           | Cold | 52.7 (42.9, 59.2) | 49.3 (39.8, 55.9) | 47.3 (37.7, 54.3) |
|           | Net  | -                 | -2.2 (-3.4, -0.7) | -3.7 (-6.0, -1.2) |
| Kyoto     | Heat | 6.4 (5.2, 7.5)    | 7.7 (6.2, 9.2)    | 8.1 (6.4, 9.7)    |
|           | Cold | 57.2 (49.6, 62.6) | 53.8 (46.3, 59.5) | 51.7 (44.3, 57.4) |
|           | Net  | -                 | -2.1 (-3.8, 0.5)  | -3.9 (-5.7, -1.6) |
| Mie       | Heat | 6.1 (5.1, 7.1)    | 7.5 (6.2, 8.7)    | 7.8 (6.4, 9.2)    |
|           | Cold | 65.2 (60.0, 69.0) | 61.8 (56.4, 66.1) | 59.8 (54.3, 64.2) |
|           | Net  | -                 | -2.1 (-3.5, 0.2)  | -3.7 (-5.3, -1.8) |

|          |      |                   |                   |                     |
|----------|------|-------------------|-------------------|---------------------|
| Miyagi   | Heat | 5.1 (3.8, 6.3)    | 6.4 (4.8, 7.9)    | 6.8 (5.0, 8.4)      |
|          | Cold | 68.8 (63.9, 72.1) | 65.6 (60.3, 69.5) | 63.5 (57.9, 68.1)   |
|          | Net  | -                 | -1.9 (-4.1, -0.0) | -3.6 (-6.3, -1.1)   |
| Miyazaki | Heat | 3.3 (1.7, 4.7)    | 4.1 (2.0, 5.7)    | 4.4 (2.0, 6.1)      |
|          | Cold | 49.1 (37.6, 56.8) | 45.4 (34.4, 53.1) | 43.3 (32.2, 51.2)   |
|          | Net  | -                 | -2.9 (-4.5, -1.1) | -4.8 (-7.4, -2.1)   |
| Nagano   | Heat | 5.9 (4.5, 7.1)    | 7.4 (5.6, 8.9)    | 7.8 (5.8, 9.5)      |
|          | Cold | 59.6 (52.0, 64.9) | 56.8 (49.4, 62.2) | 55.1 (47.6, 60.5)   |
|          | Net  | -                 | -1.3 (-2.5, 0.6)  | -2.6 (-4.3, -1.0)   |
| Nagasaki | Heat | 4.8 (3.7, 5.6)    | 6.1 (4.7, 7.2)    | 6.5 (4.8, 7.7)      |
|          | Cold | 65.7 (58.1, 70.7) | 61.7 (53.8, 67.3) | 59.3 (51.2, 65.2)   |
|          | Net  | -                 | -2.7 (-4.5, -0.5) | -4.8 (-7.0, -2.4)   |
| Nara     | Heat | 5.3 (4.1, 6.2)    | 6.4 (4.9, 7.5)    | 6.7 (5.0, 8.0)      |
|          | Cold | 65.4 (59.1, 69.7) | 61.7 (55.4, 66.1) | 59.8 (53.2, 64.9)   |
|          | Net  | -                 | -2.7 (-4.1, -0.9) | -4.2 (-6.2, -2.0)   |
| Niigata  | Heat | 4.6 (3.7, 5.3)    | 5.7 (4.6, 6.6)    | 5.9 (4.7, 7.0)      |
|          | Cold | 69.0 (63.4, 72.8) | 65.0 (59.2, 69.6) | 62.8 (56.8, 67.6)   |
|          | Net  | -                 | -2.8 (-4.8, 0.1)  | -4.8 (-7.2, -2.2)   |
| Oita     | Heat | 5.1 (3.5, 6.5)    | 6.2 (4.2, 7.8)    | 6.6 (4.3, 8.3)      |
|          | Cold | 52.0 (42.6, 58.3) | 48.4 (39.3, 54.8) | 46.3 (37.2, 53.1)   |
|          | Net  | -                 | -2.5 (-3.8, -0.7) | -4.2 (-6.4, -1.9)   |
| Okayama  | Heat | 6.2 (5.0, 7.2)    | 7.6 (6.0, 8.8)    | 7.9 (6.2, 9.4)      |
|          | Cold | 56.1 (49.4, 61.0) | 52.9 (46.2, 58.1) | 51.1 (44.3, 56.5)   |
|          | Net  | -                 | -1.9 (-3.3, -0.1) | -3.4 (-5.3, -1.5)   |
| Okinawa  | Heat | -4.1 (-26.7, 2.9) | -8.3 (-66.1, 5.2) | -11.2 (-107.1, 6.6) |
|          | Cold | 41.6 (-1.5, 60.2) | 37.8 (-2.5, 55.8) | 36.1 (-3.0, 54.1)   |
|          | Net  | -                 | -8.0 (-43.4, 0.4) | -12.6 (-83.6, 0.8)  |
| Osaka    | Heat | 6.4 (4.8, 7.7)    | 7.8 (5.8, 9.4)    | 8.1 (6.0, 9.9)      |
|          | Cold | 57.6 (49.1, 63.4) | 54.0 (45.8, 60.1) | 51.8 (43.7, 58.0)   |
|          | Net  | -                 | -2.2 (-4.0, 0.5)  | -4.0 (-5.9, -1.7)   |
| Saga     | Heat | 4.1 (3.3, 4.8)    | 4.9 (3.9, 5.7)    | 5.2 (4.0, 6.1)      |
|          | Cold | 68.1 (59.1, 73.6) | 64.1 (55.1, 70.0) | 61.7 (52.2, 68.5)   |
|          | Net  | -                 | -3.3 (-4.9, -1.2) | -5.4 (-8.0, -2.5)   |
| Saitama  | Heat | 6.7 (5.7, 7.5)    | 8.1 (6.9, 9.3)    | 8.5 (7.1, 9.7)      |
|          | Cold | 70.2 (66.9, 72.5) | 67.2 (63.5, 70.4) | 65.3 (61.2, 68.8)   |
|          | Net  | -                 | -1.6 (-2.9, 0.3)  | -3.1 (-4.9, -1.4)   |
| Shiga    | Heat | 5.9 (4.8, 6.9)    | 7.4 (5.9, 8.6)    | 7.8 (6.1, 9.2)      |
|          | Cold | 64.5 (59.0, 68.4) | 60.9 (55.2, 65.4) | 58.8 (53.0, 63.4)   |
|          | Net  | -                 | -2.1 (-3.7, 0.2)  | -3.8 (-5.7, -1.9)   |
| Shimane  | Heat | 5.1 (3.5, 6.5)    | 6.4 (4.4, 8.0)    | 6.8 (4.5, 8.6)      |
|          | Cold | 49.7 (39.4, 56.8) | 46.0 (35.8, 53.1) | 44.0 (33.8, 51.4)   |

|           |      |                   |                   |                   |
|-----------|------|-------------------|-------------------|-------------------|
| Shizuoka  | Net  | -                 | -2.5 (-3.9, -0.8) | -4.1 (-6.2, -2.1) |
|           | Heat | 6.2 (4.9, 7.4)    | 8.0 (6.2, 9.6)    | 8.5 (6.4, 10.2)   |
|           | Cold | 68.3 (64.1, 71.2) | 64.6 (60.1, 68.4) | 62.5 (57.6, 66.6) |
| Tochigi   | Net  | -                 | -1.9 (-3.3, 0.2)  | -3.5 (-5.6, -1.4) |
|           | Heat | 4.1 (3.2, 4.9)    | 5.1 (4.0, 6.0)    | 5.4 (4.1, 6.4)    |
|           | Cold | 72.6 (67.5, 75.9) | 69.9 (64.6, 73.6) | 68.2 (62.8, 72.2) |
| Tokushima | Net  | -                 | -1.7 (-2.9, 0.1)  | -3.1 (-4.6, -1.4) |
|           | Heat | 5.2 (4.0, 6.4)    | 6.6 (4.9, 8.2)    | 7.0 (5.1, 8.7)    |
|           | Cold | 60.2 (52.6, 65.5) | 56.7 (49.1, 62.4) | 54.4 (46.8, 60.4) |
| Tokyo     | Net  | -                 | -2.1 (-4.0, 0.1)  | -4.0 (-6.2, -1.8) |
|           | Heat | 6.1 (3.2, 8.2)    | 7.6 (3.8, 10.0)   | 8.0 (3.8, 10.6)   |
|           | Cold | 68.5 (55.9, 74.0) | 65.8 (54.4, 71.5) | 63.6 (52.2, 69.7) |
| Tottori   | Net  | -                 | -1.3 (-3.7, 1.9)  | -3.0 (-6.1, 0.1)  |
|           | Heat | 6.2 (4.8, 7.3)    | 7.7 (5.9, 9.1)    | 8.0 (6.1, 9.7)    |
|           | Cold | 58.8 (51.0, 63.9) | 54.9 (47.1, 60.6) | 52.5 (44.5, 58.5) |
| Toyama    | Net  | -                 | -2.4 (-4.1, 0.1)  | -4.4 (-6.4, -1.9) |
|           | Heat | 6.3 (5.2, 7.1)    | 7.5 (6.3, 8.7)    | 7.9 (6.3, 9.2)    |
|           | Cold | 66.0 (61.0, 69.7) | 62.3 (57.0, 66.6) | 60.2 (54.7, 65.0) |
| Wakayama  | Net  | -                 | -2.4 (-4.0, -0.2) | -4.2 (-6.2, -1.9) |
|           | Heat | 4.1 (2.9, 5.3)    | 5.2 (3.7, 6.6)    | 5.5 (3.8, 7.0)    |
|           | Cold | 57.0 (46.0, 64.6) | 53.4 (42.5, 61.1) | 51.3 (40.6, 59.0) |
| Yamagata  | Net  | -                 | -2.5 (-4.0, -0.3) | -4.3 (-6.3, -2.2) |
|           | Heat | 5.0 (3.8, 6.1)    | 6.1 (4.6, 7.3)    | 6.4 (4.7, 7.7)    |
|           | Cold | 65.7 (58.2, 70.4) | 62.3 (54.9, 67.1) | 60.6 (53.1, 65.8) |
| Yamaguchi | Net  | -                 | -2.3 (-3.5, -0.5) | -3.6 (-5.3, -1.6) |
|           | Heat | 6.3 (5.3, 7.2)    | 7.8 (6.4, 9.1)    | 8.2 (6.6, 9.6)    |
|           | Cold | 64.7 (59.2, 68.5) | 61.1 (54.9, 65.7) | 58.7 (52.3, 63.9) |
| Yamanashi | Net  | -                 | -2.1 (-4.3, -0.1) | -4.2 (-6.7, -1.7) |
|           | Heat | 5.0 (3.8, 6.1)    | 6.1 (4.6, 7.5)    | 6.4 (4.8, 7.9)    |
|           | Cold | 57.3 (48.1, 64.0) | 54.4 (45.3, 61.2) | 52.5 (43.5, 59.5) |
|           | Net  | -                 | -1.8 (-3.1, 0.4)  | -3.3 (-5.1, -1.5) |

---

**Table S4.** Heat-related, cold-related, and net change in excess morbidity in diarrhea (%) with 95% eCI by prefecture and period under the RCP6.0 scenario. Heat-related and cold-related morbidity were estimated using a two-stage time series regression model with quasi-Poisson family (Gasparri et al. 2017; Vicedo-Cabrera et al. 2019). Estimates are presented as GCM-ensemble average decadal fractions. RCP=representative concentration pathway; GCM=general circulation model.

|           |      | RCP6.0            |                   |                   |
|-----------|------|-------------------|-------------------|-------------------|
|           |      | 2010–2019         | 2050–2059         | 2090–2099         |
| Aichi     | Heat | 6.7 (5.4, 7.9)    | 7.8 (6.3, 9.1)    | 9.4 (7.2, 11.5)   |
|           | Cold | 65.8 (59.4, 69.9) | 62.8 (56.4, 67.1) | 58.8 (52.1, 63.9) |
|           | Net  | -                 | -1.9 (-3.1, -0.3) | -4.3 (-6.3, -2.3) |
| Akita     | Heat | 5.6 (4.2, 6.7)    | 6.6 (5.0, 7.9)    | 8.1 (6.1, 10.0)   |
|           | Cold | 68.5 (62.8, 72.4) | 65.7 (59.8, 69.6) | 61.2 (54.4, 66.3) |
|           | Net  | -                 | -1.8 (-3.0, -0.4) | -4.8 (-7.5, -2.5) |
| Aomori    | Heat | 3.9 (2.3, 5.1)    | 4.6 (2.8, 6.1)    | 6.0 (3.6, 7.9)    |
|           | Cold | 70.6 (61.9, 75.7) | 67.9 (59.2, 73.1) | 63.1 (53.7, 69.6) |
|           | Net  | -                 | -2.0 (-3.2, -0.4) | -5.4 (-9.1, -2.6) |
| Chiba     | Heat | 6.0 (4.9, 6.9)    | 7.0 (5.7, 8.2)    | 8.5 (6.8, 10.4)   |
|           | Cold | 72.3 (68.8, 74.9) | 69.1 (64.6, 72.2) | 64.7 (59.6, 69.2) |
|           | Net  | -                 | -2.2 (-4.0, -0.5) | -5.1 (-7.4, -2.7) |
| Ehime     | Heat | 6.4 (5.2, 7.4)    | 7.4 (6.1, 8.6)    | 9.1 (7.3, 11.1)   |
|           | Cold | 65.5 (59.8, 69.3) | 62.1 (56.3, 66.2) | 57.5 (51.1, 62.8) |
|           | Net  | -                 | -2.3 (-3.1, -1.0) | -5.2 (-7.2, -3.1) |
| Fukui     | Heat | 5.5 (4.3, 6.5)    | 6.3 (4.8, 7.5)    | 7.4 (5.5, 9.1)    |
|           | Cold | 60.1 (53.0, 65.0) | 57.2 (50.4, 62.0) | 53.1 (46.1, 58.9) |
|           | Net  | -                 | -2.2 (-2.8, -1.0) | -5.2 (-6.9, -3.2) |
| Fukuoka   | Heat | 5.3 (4.0, 6.6)    | 6.4 (4.8, 7.9)    | 8.0 (5.7, 10.4)   |
|           | Cold | 53.2 (43.7, 60.2) | 49.3 (39.7, 56.4) | 44.2 (34.6, 52.1) |
|           | Net  | -                 | -2.8 (-4.5, -0.8) | -6.3 (-9.1, -3.6) |
| Fukushima | Heat | 5.5 (4.3, 6.5)    | 6.4 (5.1, 7.6)    | 8.0 (6.1, 10.2)   |
|           | Cold | 67.5 (61.9, 71.2) | 64.4 (58.5, 68.6) | 60.4 (54.0, 65.4) |
|           | Net  | -                 | -2.2 (-3.9, -0.2) | -4.6 (-6.7, -2.3) |
| Gifu      | Heat | 6.1 (4.6, 7.3)    | 7.0 (5.4, 8.5)    | 8.5 (6.3, 10.7)   |
|           | Cold | 60.1 (51.1, 66.2) | 57.1 (48.2, 63.3) | 53.0 (43.8, 59.8) |
|           | Net  | -                 | -2.1 (-3.2, -0.4) | -4.7 (-6.7, -2.5) |
| Gunma     | Heat | 6.2 (5.1, 7.1)    | 7.2 (5.9, 8.3)    | 8.7 (7.0, 10.7)   |

|           |      |                   |                   |                   |
|-----------|------|-------------------|-------------------|-------------------|
|           | Cold | 68.3 (64.3, 71.2) | 65.3 (60.8, 68.7) | 61.3 (56.1, 65.7) |
|           | Net  | -                 | -2.0 (-3.4, -0.2) | -4.5 (-6.4, -2.3) |
| Hiroshima | Heat | 5.6 (4.3, 6.7)    | 6.5 (5.0, 7.8)    | 7.9 (6.0, 10.0)   |
|           | Cold | 57.3 (48.7, 63.1) | 54.2 (45.8, 60.0) | 49.8 (41.2, 56.5) |
|           | Net  | -                 | -2.2 (-2.9, -1.0) | -5.1 (-7.0, -3.2) |
| Hokkaido  | Heat | 4.3 (1.5, 6.4)    | 5.5 (2.0, 8.1)    | 7.5 (2.8, 10.8)   |
|           | Cold | 57.9 (44.6, 65.2) | 55.0 (42.0, 62.5) | 50.0 (37.7, 58.5) |
|           | Net  | -                 | -1.7 (-3.5, 0.3)  | -4.6 (-8.8, -1.7) |
| Hyogo     | Heat | 5.1 (3.7, 6.3)    | 6.2 (4.5, 7.6)    | 7.8 (5.5, 10.1)   |
|           | Cold | 53.4 (44.0, 59.9) | 49.9 (40.6, 56.4) | 45.4 (36.1, 52.6) |
|           | Net  | -                 | -2.4 (-3.7, -0.8) | -5.3 (-7.4, -3.2) |
| Ibaraki   | Heat | 4.4 (3.1, 5.6)    | 5.3 (3.7, 6.7)    | 6.7 (4.5, 8.8)    |
|           | Cold | 67.1 (61.3, 70.9) | 64.3 (58.3, 68.6) | 60.3 (53.8, 65.7) |
|           | Net  | -                 | -1.9 (-3.6, -0.1) | -4.5 (-7.0, -2.1) |
| Ishikawa  | Heat | 4.7 (3.7, 5.6)    | 5.6 (4.4, 6.6)    | 6.8 (5.2, 8.5)    |
|           | Cold | 62.2 (54.5, 67.4) | 58.6 (50.8, 64.1) | 53.8 (45.7, 60.0) |
|           | Net  | -                 | -2.8 (-4.3, -0.7) | -6.3 (-8.6, -3.9) |
| Iwate     | Heat | 5.6 (4.1, 6.9)    | 6.6 (4.8, 8.1)    | 8.3 (6.1, 10.4)   |
|           | Cold | 68.4 (61.6, 72.6) | 65.8 (58.8, 70.2) | 61.7 (53.9, 67.1) |
|           | Net  | -                 | -1.6 (-3.1, -0.1) | -4.0 (-7.0, -1.6) |
| Kagawa    | Heat | 6.0 (4.6, 7.3)    | 7.0 (5.3, 8.4)    | 8.4 (6.3, 10.4)   |
|           | Cold | 56.7 (47.1, 62.8) | 53.2 (43.9, 59.4) | 48.7 (39.3, 55.7) |
|           | Net  | -                 | -2.5 (-3.7, -1.0) | -5.7 (-7.6, -3.5) |
| Kagoshima | Heat | 6.5 (5.1, 7.7)    | 7.8 (6.1, 9.4)    | 9.8 (7.3, 12.0)   |
|           | Cold | 60.4 (53.3, 65.2) | 56.3 (48.6, 61.8) | 51.0 (42.8, 58.1) |
|           | Net  | -                 | -2.8 (-4.8, -0.8) | -6.1 (-8.9, -3.1) |
| Kanagawa  | Heat | 5.7 (4.4, 6.8)    | 6.6 (5.1, 7.9)    | 8.0 (5.9, 9.9)    |
|           | Cold | 71.8 (67.5, 74.7) | 68.6 (64.2, 71.7) | 64.2 (59.0, 68.7) |
|           | Net  | -                 | -2.3 (-3.4, -1.1) | -5.4 (-7.5, -3.1) |
| Kochi     | Heat | 4.7 (3.5, 5.6)    | 5.4 (3.9, 6.5)    | 6.5 (4.6, 8.1)    |
|           | Cold | 63.7 (55.3, 69.0) | 60.3 (52.0, 65.9) | 55.5 (46.8, 62.2) |
|           | Net  | -                 | -2.6 (-3.6, -1.2) | -6.4 (-8.4, -3.9) |
| Kumamoto  | Heat | 5.7 (4.3, 7.0)    | 6.7 (5.0, 8.1)    | 8.0 (5.8, 9.9)    |
|           | Cold | 52.8 (43.1, 59.4) | 49.8 (40.2, 56.4) | 45.7 (36.2, 53.2) |
|           | Net  | -                 | -2.0 (-3.0, -1.0) | -4.8 (-6.8, -2.6) |
| Kyoto     | Heat | 6.4 (5.1, 7.6)    | 7.4 (5.9, 8.8)    | 9.0 (6.9, 11.2)   |
|           | Cold | 57.4 (49.9, 62.9) | 54.0 (46.6, 59.6) | 49.7 (42.1, 55.8) |
|           | Net  | -                 | -2.4 (-3.5, -0.5) | -5.1 (-7.1, -3.0) |
| Mie       | Heat | 6.2 (5.0, 7.2)    | 7.2 (5.9, 8.4)    | 8.6 (6.9, 10.4)   |
|           | Cold | 65.3 (60.3, 69.2) | 62.2 (56.8, 66.3) | 58.0 (52.1, 62.9) |
|           | Net  | -                 | -2.2 (-3.3, -0.6) | -5.0 (-6.7, -3.0) |

|          |      |                   |                   |                     |
|----------|------|-------------------|-------------------|---------------------|
| Miyagi   | Heat | 5.2 (3.8, 6.4)    | 6.1 (4.5, 7.5)    | 7.6 (5.5, 9.8)      |
|          | Cold | 69.1 (64.2, 72.5) | 66.0 (60.6, 69.7) | 61.5 (55.4, 66.4)   |
|          | Net  | -                 | -2.2 (-3.9, -0.3) | -5.1 (-7.7, -2.6)   |
| Miyazaki | Heat | 3.4 (1.7, 4.7)    | 3.9 (1.9, 5.5)    | 4.8 (1.9, 6.9)      |
|          | Cold | 49.2 (37.6, 57.0) | 46.0 (34.8, 53.7) | 41.6 (30.6, 49.8)   |
|          | Net  | -                 | -2.6 (-3.8, -1.3) | -6.2 (-8.7, -3.6)   |
| Nagano   | Heat | 5.9 (4.6, 7.1)    | 7.0 (5.4, 8.5)    | 8.8 (6.6, 11.2)     |
|          | Cold | 59.8 (52.3, 65.1) | 57.0 (49.5, 62.3) | 53.3 (45.6, 59.0)   |
|          | Net  | -                 | -1.8 (-2.8, -0.1) | -3.6 (-5.4, -1.8)   |
| Nagasaki | Heat | 4.8 (3.7, 5.8)    | 5.8 (4.4, 6.9)    | 7.3 (5.4, 9.1)      |
|          | Cold | 66.0 (58.3, 70.9) | 62.2 (54.3, 67.6) | 56.9 (48.3, 63.6)   |
|          | Net  | -                 | -2.8 (-4.4, -1.0) | -6.6 (-9.2, -4.0)   |
| Nara     | Heat | 5.4 (4.2, 6.3)    | 6.1 (4.7, 7.3)    | 7.3 (5.6, 8.8)      |
|          | Cold | 65.5 (59.2, 69.7) | 62.4 (56.0, 66.8) | 58.0 (51.3, 63.7)   |
|          | Net  | -                 | -2.4 (-3.1, -1.2) | -5.5 (-7.4, -3.2)   |
| Niigata  | Heat | 4.6 (3.7, 5.4)    | 5.4 (4.4, 6.3)    | 6.7 (5.3, 8.4)      |
|          | Cold | 69.2 (63.7, 73.1) | 65.4 (59.4, 69.7) | 60.4 (53.8, 65.6)   |
|          | Net  | -                 | -3.0 (-4.7, -0.7) | -6.7 (-9.0, -4.1)   |
| Oita     | Heat | 5.1 (3.5, 6.6)    | 6.0 (4.1, 7.6)    | 7.3 (4.7, 9.5)      |
|          | Cold | 52.2 (42.8, 58.5) | 48.9 (39.8, 55.1) | 44.4 (35.3, 51.6)   |
|          | Net  | -                 | -2.4 (-3.2, -1.2) | -5.7 (-7.7, -3.4)   |
| Okayama  | Heat | 6.2 (5.0, 7.3)    | 7.3 (5.8, 8.6)    | 8.9 (6.8, 11.1)     |
|          | Cold | 56.3 (49.6, 61.2) | 53.3 (46.7, 58.1) | 49.1 (42.1, 54.8)   |
|          | Net  | -                 | -2.0 (-2.8, -0.7) | -4.6 (-6.5, -2.8)   |
| Okinawa  | Heat | -4.0 (-27.1, 2.8) | -7.5 (-61.5, 4.8) | -15.1 (-185.8, 8.2) |
|          | Cold | 41.5 (-1.4, 60.2) | 38.5 (-2.2, 56.6) | 35.0 (-3.1, 52.6)   |
|          | Net  | -                 | -6.6 (-38.1, 0.2) | -17.6 (-164.4, 0.9) |
| Osaka    | Heat | 6.4 (4.8, 7.8)    | 7.5 (5.6, 9.1)    | 9.0 (6.5, 11.4)     |
|          | Cold | 57.8 (49.4, 63.6) | 54.3 (46.0, 60.3) | 49.8 (41.5, 56.4)   |
|          | Net  | -                 | -2.4 (-3.7, -0.6) | -5.3 (-7.5, -3.0)   |
| Saga     | Heat | 4.2 (3.4, 4.9)    | 4.7 (3.8, 5.6)    | 5.7 (4.3, 6.9)      |
|          | Cold | 68.3 (59.3, 73.9) | 64.7 (55.5, 70.6) | 59.5 (49.9, 67.0)   |
|          | Net  | -                 | -3.0 (-4.1, -1.6) | -7.3 (-9.6, -4.5)   |
| Saitama  | Heat | 6.7 (5.7, 7.6)    | 7.8 (6.6, 8.9)    | 9.4 (7.7, 11.2)     |
|          | Cold | 70.3 (67.0, 72.8) | 67.5 (63.5, 70.5) | 63.7 (59.2, 67.7)   |
|          | Net  | -                 | -1.8 (-3.1, -0.2) | -4.0 (-5.8, -2.0)   |
| Shiga    | Heat | 6.0 (4.8, 7.0)    | 7.1 (5.7, 8.4)    | 8.7 (6.7, 10.7)     |
|          | Cold | 64.7 (59.2, 68.6) | 61.3 (55.6, 65.5) | 56.9 (50.8, 61.8)   |
|          | Net  | -                 | -2.3 (-3.4, -0.6) | -5.1 (-7.0, -3.1)   |
| Shimane  | Heat | 5.1 (3.5, 6.5)    | 6.1 (4.2, 7.8)    | 7.7 (5.1, 10.2)     |
|          | Cold | 50.0 (39.6, 57.0) | 46.4 (36.3, 53.4) | 41.8 (31.6, 49.4)   |

|           |      |                   |                   |                   |
|-----------|------|-------------------|-------------------|-------------------|
| Shizuoka  | Net  | -                 | -2.5 (-3.3, -1.1) | -5.7 (-7.9, -3.7) |
|           | Heat | 6.3 (4.8, 7.5)    | 7.6 (5.8, 9.1)    | 9.4 (6.9, 11.7)   |
|           | Cold | 68.5 (64.3, 71.5) | 65.2 (60.5, 68.6) | 60.8 (55.5, 65.4) |
| Tochigi   | Net  | -                 | -2.0 (-3.4, -0.6) | -4.6 (-7.0, -2.3) |
|           | Heat | 4.1 (3.2, 5.0)    | 4.9 (3.8, 5.8)    | 6.0 (4.5, 7.6)    |
|           | Cold | 72.7 (67.5, 76.1) | 70.2 (65.0, 73.8) | 66.6 (60.9, 71.0) |
| Tokushima | Net  | -                 | -1.8 (-2.7, -0.6) | -4.2 (-5.8, -2.5) |
|           | Heat | 5.3 (4.0, 6.5)    | 6.3 (4.7, 7.7)    | 7.9 (5.7, 10.3)   |
|           | Cold | 60.4 (53.0, 65.7) | 56.9 (49.2, 62.8) | 52.3 (44.1, 59.0) |
| Tokyo     | Net  | -                 | -2.5 (-4.4, -0.2) | -5.5 (-8.0, -2.9) |
|           | Heat | 6.2 (3.2, 8.3)    | 7.2 (3.6, 9.6)    | 8.8 (4.0, 12.0)   |
|           | Cold | 68.6 (56.2, 74.1) | 65.9 (54.3, 71.6) | 61.9 (50.6, 68.4) |
| Tottori   | Net  | -                 | -1.6 (-3.6, 0.4)  | -4.1 (-7.5, -0.5) |
|           | Heat | 6.2 (4.7, 7.4)    | 7.4 (5.7, 8.8)    | 9.1 (6.8, 11.4)   |
|           | Cold | 59.0 (51.2, 64.3) | 55.2 (47.1, 60.7) | 50.2 (42.0, 56.4) |
| Toyama    | Net  | -                 | -2.7 (-4.1, -0.5) | -6.0 (-8.1, -3.6) |
|           | Heat | 6.2 (5.1, 7.2)    | 7.3 (6.0, 8.5)    | 8.8 (7.0, 10.9)   |
|           | Cold | 66.3 (61.2, 70.0) | 62.8 (57.5, 66.6) | 58.2 (52.4, 62.9) |
| Wakayama  | Net  | -                 | -2.5 (-3.6, -0.9) | -5.6 (-7.2, -3.7) |
|           | Heat | 4.2 (2.9, 5.4)    | 5.0 (3.5, 6.3)    | 6.2 (4.2, 8.2)    |
|           | Cold | 57.2 (46.2, 64.8) | 53.9 (42.9, 61.5) | 49.3 (38.4, 57.4) |
| Yamagata  | Net  | -                 | -2.6 (-3.9, -0.8) | -5.8 (-8.0, -3.5) |
|           | Heat | 5.1 (3.8, 6.1)    | 5.9 (4.4, 7.2)    | 7.2 (5.3, 9.1)    |
|           | Cold | 65.8 (58.3, 70.4) | 62.8 (55.4, 67.5) | 58.8 (51.1, 64.2) |
| Yamaguchi | Net  | -                 | -2.2 (-2.8, -1.1) | -4.9 (-6.4, -3.2) |
|           | Heat | 6.3 (5.2, 7.2)    | 7.4 (6.2, 8.6)    | 9.2 (7.3, 11.3)   |
|           | Cold | 65.1 (59.6, 68.9) | 61.6 (55.3, 66.1) | 56.6 (49.6, 62.5) |
| Yamanashi | Net  | -                 | -2.4 (-4.6, -0.3) | -5.6 (-8.5, -2.9) |
|           | Heat | 5.0 (3.8, 6.1)    | 5.8 (4.4, 7.1)    | 7.2 (5.3, 9.2)    |
|           | Cold | 57.5 (48.2, 64.2) | 54.6 (45.4, 61.5) | 50.7 (41.3, 58.1) |
|           | Net  | -                 | -2.1 (-3.4, -0.2) | -4.6 (-6.6, -2.3) |

---

**Table S5.** Heat-related, cold-related, and net change in excess morbidity in diarrhea (%) with 95% eCI by prefecture and period under the RCP8.5 scenario. Heat-related and cold-related morbidity were estimated using a two-stage time series regression model with quasi-Poisson family (Gasparri et al. 2017; Vicedo-Cabrera et al. 2019). Estimates are presented as GCM-ensemble average decadal fractions. GCM=general circulation model; RCP=representative concentration pathway.

|           |      | RCP8.5            |                   |                     |
|-----------|------|-------------------|-------------------|---------------------|
|           |      | 2010–2019         | 2050–2059         | 2090–2099           |
| Aichi     | Heat | 6.8 (5.5, 7.8)    | 8.6 (6.8, 10.2)   | 11.0 (8.2, 13.3)    |
|           | Cold | 65.2 (59.1, 69.3) | 60.6 (54.2, 65.2) | 52.9 (44.8, 61.2)   |
|           | Net  | -                 | -2.7 (-4.4, -1.3) | -8.1 (-12.1, -3.5)  |
| Akita     | Heat | 5.7 (4.3, 6.9)    | 7.4 (5.6, 9.0)    | 9.8 (7.1, 11.9)     |
|           | Cold | 68.1 (62.3, 71.9) | 63.3 (57.3, 67.8) | 55.8 (48.2, 63.3)   |
|           | Net  | -                 | -3.1 (-5.4, -1.1) | -8.2 (-12.8, -3.7)  |
| Aomori    | Heat | 3.9 (2.3, 5.3)    | 5.4 (3.2, 7.1)    | 7.5 (4.4, 9.8)      |
|           | Cold | 70.2 (61.5, 75.2) | 65.3 (56.4, 71.0) | 57.3 (47.4, 66.1)   |
|           | Net  | -                 | -3.5 (-6.4, -1.2) | -9.4 (-15.1, -3.9)  |
| Chiba     | Heat | 6.1 (5.0, 7.0)    | 7.7 (6.3, 9.2)    | 9.9 (7.6, 11.9)     |
|           | Cold | 71.7 (68.3, 74.1) | 66.7 (62.1, 70.1) | 58.6 (51.1, 66.3)   |
|           | Net  | -                 | -3.3 (-5.7, -1.7) | -9.2 (-14.7, -4.1)  |
| Ehime     | Heat | 6.5 (5.3, 7.4)    | 8.5 (6.9, 9.9)    | 11.0 (8.5, 13.0)    |
|           | Cold | 64.8 (59.1, 68.7) | 59.5 (53.2, 64.1) | 51.0 (43.1, 59.0)   |
|           | Net  | -                 | -3.3 (-5.5, -1.8) | -9.2 (-13.5, -4.6)  |
| Fukui     | Heat | 5.6 (4.4, 6.6)    | 7.0 (5.3, 8.5)    | 8.7 (6.2, 10.9)     |
|           | Cold | 59.5 (52.6, 64.3) | 54.8 (47.9, 60.1) | 47.4 (39.4, 55.3)   |
|           | Net  | -                 | -3.3 (-5.4, -1.9) | -9.0 (-12.9, -4.7)  |
| Fukuoka   | Heat | 5.5 (4.1, 6.7)    | 7.2 (5.3, 9.0)    | 9.6 (6.6, 12.2)     |
|           | Cold | 52.7 (43.4, 59.6) | 46.7 (37.1, 53.9) | 37.9 (27.8, 48.6)   |
|           | Net  | -                 | -4.2 (-6.7, -2.2) | -10.6 (-15.4, -5.0) |
| Fukushima | Heat | 5.5 (4.4, 6.5)    | 7.1 (5.6, 8.5)    | 9.5 (7.0, 11.5)     |
|           | Cold | 67.1 (61.5, 70.8) | 62.5 (56.7, 66.6) | 55.2 (47.8, 62.6)   |
|           | Net  | -                 | -3.0 (-4.9, -1.6) | -7.9 (-11.8, -3.8)  |
| Gifu      | Heat | 6.1 (4.7, 7.2)    | 7.8 (5.9, 9.5)    | 10.0 (7.2, 12.4)    |
|           | Cold | 59.6 (50.6, 65.6) | 54.8 (45.8, 61.2) | 47.3 (37.3, 56.8)   |
|           | Net  | -                 | -3.1 (-4.9, -1.6) | -8.4 (-12.5, -3.7)  |
| Gunma     | Heat | 6.2 (5.2, 7.1)    | 7.9 (6.5, 9.3)    | 10.2 (7.8, 12.2)    |



|           |      |                   |                   |                     |
|-----------|------|-------------------|-------------------|---------------------|
|           | Cold | 67.8 (63.8, 70.7) | 63.3 (58.7, 66.8) | 55.6 (48.8, 63.0)   |
|           | Net  | -                 | -2.9 (-4.6, -1.7) | -8.2 (-12.3, -3.8)  |
| Hiroshima | Heat | 5.6 (4.4, 6.7)    | 7.3 (5.6, 8.9)    | 9.6 (7.0, 11.7)     |
|           | Cold | 56.8 (48.2, 62.6) | 51.8 (43.2, 58.0) | 44.0 (34.6, 53.0)   |
|           | Net  | -                 | -3.3 (-5.3, -1.9) | -8.8 (-12.9, -4.5)  |
| Hokkaido  | Heat | 4.4 (1.6, 6.6)    | 6.5 (2.4, 9.5)    | 9.4 (3.4, 13.3)     |
|           | Cold | 57.5 (44.0, 64.8) | 52.2 (39.6, 60.0) | 44.3 (32.7, 53.5)   |
|           | Net  | -                 | -3.3 (-6.5, -0.8) | -8.3 (-13.5, -3.7)  |
| Hyogo     | Heat | 5.2 (3.8, 6.3)    | 7.1 (5.1, 8.8)    | 9.6 (6.5, 12.0)     |
|           | Cold | 52.8 (43.2, 59.2) | 47.4 (38.1, 54.2) | 39.4 (29.6, 49.3)   |
|           | Net  | -                 | -3.4 (-5.5, -1.8) | -8.9 (-13.0, -4.1)  |
| Ibaraki   | Heat | 4.5 (3.2, 5.6)    | 6.0 (4.1, 7.6)    | 7.9 (5.0, 10.2)     |
|           | Cold | 66.7 (61.0, 70.5) | 62.3 (56.3, 66.6) | 55.0 (47.3, 62.8)   |
|           | Net  | -                 | -2.9 (-5.2, -1.5) | -8.2 (-13.1, -3.6)  |
| Ishikawa  | Heat | 4.8 (3.8, 5.6)    | 6.2 (4.8, 7.5)    | 8.1 (5.9, 10.0)     |
|           | Cold | 61.6 (54.1, 66.8) | 56.2 (48.4, 61.8) | 47.5 (38.4, 56.8)   |
|           | Net  | -                 | -4.1 (-6.4, -2.3) | -10.8 (-15.3, -5.3) |
| Iwate     | Heat | 5.8 (4.1, 7.1)    | 7.6 (5.6, 9.3)    | 10.1 (7.2, 12.4)    |
|           | Cold | 68.0 (61.1, 72.1) | 63.4 (56.4, 68.3) | 56.7 (48.3, 64.0)   |
|           | Net  | -                 | -2.7 (-5.0, -0.7) | -6.9 (-11.4, -2.9)  |
| Kagawa    | Heat | 6.1 (4.7, 7.3)    | 7.8 (5.9, 9.4)    | 10.0 (7.2, 12.4)    |
|           | Cold | 56.0 (46.6, 62.2) | 50.7 (41.4, 57.2) | 42.5 (32.6, 52.0)   |
|           | Net  | -                 | -3.7 (-5.7, -2.1) | -9.6 (-13.6, -4.9)  |
| Kagoshima | Heat | 6.5 (5.2, 7.7)    | 8.8 (6.8, 10.7)   | 11.7 (8.5, 14.2)    |
|           | Cold | 59.7 (52.6, 64.6) | 53.4 (45.6, 59.2) | 44.3 (34.6, 54.3)   |
|           | Net  | -                 | -4.0 (-6.8, -1.8) | -10.2 (-15.8, -4.3) |
| Kanagawa  | Heat | 5.8 (4.5, 6.8)    | 7.5 (5.7, 9.0)    | 9.5 (6.7, 11.8)     |
|           | Cold | 71.2 (66.9, 74.1) | 66.1 (61.1, 69.7) | 57.2 (49.7, 65.0)   |
|           | Net  | -                 | -3.4 (-5.7, -2.1) | -10.2 (-15.1, -5.1) |
| Kochi     | Heat | 4.7 (3.5, 5.6)    | 6.1 (4.4, 7.5)    | 8.0 (5.4, 10.0)     |
|           | Cold | 63.1 (54.9, 68.5) | 57.3 (49.0, 63.2) | 48.8 (39.3, 57.8)   |
|           | Net  | -                 | -4.4 (-6.6, -2.7) | -11.0 (-15.5, -6.0) |
| Kumamoto  | Heat | 5.8 (4.4, 7.1)    | 7.6 (5.5, 9.2)    | 9.9 (6.8, 12.3)     |
|           | Cold | 52.4 (42.6, 58.9) | 47.3 (37.8, 54.2) | 40.2 (30.0, 49.2)   |
|           | Net  | -                 | -3.4 (-5.3, -1.8) | -8.2 (-12.5, -3.9)  |
| Kyoto     | Heat | 6.5 (5.3, 7.6)    | 8.3 (6.5, 9.9)    | 10.6 (7.9, 13.1)    |
|           | Cold | 56.8 (49.4, 62.2) | 51.7 (44.2, 57.5) | 43.8 (35.4, 52.7)   |
|           | Net  | -                 | -3.3 (-5.1, -1.8) | -8.8 (-12.5, -4.3)  |
| Mie       | Heat | 6.2 (5.1, 7.1)    | 7.9 (6.5, 9.3)    | 10.1 (7.8, 12.1)    |
|           | Cold | 64.7 (59.6, 68.6) | 59.8 (54.1, 64.1) | 51.7 (44.1, 59.9)   |
|           | Net  | -                 | -3.2 (-5.2, -1.8) | -9.1 (-13.4, -4.3)  |

|          |      |                   |                     |                      |
|----------|------|-------------------|---------------------|----------------------|
| Miyagi   | Heat | 5.3 (3.9, 6.5)    | 6.9 (5.1, 8.4)      | 9.1 (6.3, 11.3)      |
|          | Cold | 68.6 (63.7, 72.0) | 63.7 (58.4, 67.8)   | 56.0 (48.7, 63.5)    |
|          | Net  | -                 | -3.3 (-5.6, -1.3)   | -8.8 (-13.9, -3.9)   |
| Miyazaki | Heat | 3.4 (1.8, 4.7)    | 4.5 (2.0, 6.3)      | 5.9 (1.9, 8.8)       |
|          | Cold | 48.8 (37.4, 56.5) | 43.3 (32.3, 51.1)   | 35.7 (24.7, 45.5)    |
|          | Net  | -                 | -4.4 (-7.0, -2.6)   | -10.6 (-16.0, -5.3)  |
| Nagano   | Heat | 6.0 (4.7, 7.2)    | 7.9 (6.0, 9.5)      | 10.5 (7.7, 12.8)     |
|          | Cold | 59.3 (51.9, 64.6) | 55.1 (47.8, 60.3)   | 48.6 (40.3, 56.3)    |
|          | Net  | -                 | -2.4 (-3.7, -1.2)   | -6.3 (-9.5, -2.8)    |
| Nagasaki | Heat | 4.9 (3.8, 5.7)    | 6.6 (5.0, 8.0)      | 8.9 (6.3, 10.9)      |
|          | Cold | 65.3 (57.8, 70.3) | 59.2 (51.0, 65.1)   | 49.7 (39.8, 60.1)    |
|          | Net  | -                 | -4.3 (-7.0, -2.3)   | -11.5 (-16.8, -5.3)  |
| Nara     | Heat | 5.4 (4.2, 6.4)    | 6.9 (5.3, 8.4)      | 8.9 (6.5, 11.0)      |
|          | Cold | 64.8 (58.6, 69.1) | 59.7 (53.0, 64.6)   | 51.9 (43.6, 59.9)    |
|          | Net  | -                 | -3.6 (-5.8, -2.0)   | -9.4 (-13.6, -4.9)   |
| Niigata  | Heat | 4.7 (3.8, 5.4)    | 6.0 (4.8, 7.1)      | 8.1 (6.1, 9.7)       |
|          | Cold | 68.6 (63.2, 72.4) | 63.1 (57.3, 67.5)   | 54.3 (46.6, 62.4)    |
|          | Net  | -                 | -4.2 (-6.4, -2.2)   | -10.9 (-15.1, -5.6)  |
| Oita     | Heat | 5.2 (3.6, 6.6)    | 6.8 (4.5, 8.6)      | 8.8 (5.4, 11.5)      |
|          | Cold | 51.6 (42.3, 57.9) | 46.3 (37.2, 52.9)   | 38.2 (28.7, 47.4)    |
|          | Net  | -                 | -3.8 (-6.0, -2.2)   | -9.8 (-14.3, -5.0)   |
| Okayama  | Heat | 6.3 (5.1, 7.3)    | 8.1 (6.4, 9.8)      | 10.6 (7.8, 12.9)     |
|          | Cold | 55.8 (49.1, 60.7) | 51.0 (44.2, 56.3)   | 43.4 (35.4, 51.6)    |
|          | Net  | -                 | -2.9 (-4.8, -1.6)   | -8.1 (-12.0, -4.0)   |
| Okinawa  | Heat | -3.9 (-26.5, 2.8) | -11.7 (-121.4, 6.6) | -29.8 (-632.2, 12.2) |
|          | Cold | 41.3 (-1.8, 60.1) | 36.4 (-2.7, 54.2)   | 30.8 (-3.5, 48.5)    |
|          | Net  | -                 | -12.8 (-101.7, 1.0) | -36.4 (-622.7, 1.9)  |
| Osaka    | Heat | 6.4 (4.9, 7.7)    | 8.3 (6.2, 10.2)     | 10.8 (7.5, 13.5)     |
|          | Cold | 57.1 (48.7, 62.9) | 51.9 (43.5, 58.0)   | 43.5 (34.3, 53.0)    |
|          | Net  | -                 | -3.4 (-5.5, -1.8)   | -9.3 (-13.6, -4.5)   |
| Saga     | Heat | 4.2 (3.4, 4.9)    | 5.3 (4.1, 6.4)      | 7.0 (5.1, 8.7)       |
|          | Cold | 67.7 (58.9, 73.3) | 61.6 (52.0, 68.3)   | 52.4 (41.2, 62.9)    |
|          | Net  | -                 | -5.0 (-7.7, -2.8)   | -12.6 (-18.0, -6.7)  |
| Saitama  | Heat | 6.8 (5.8, 7.6)    | 8.5 (7.2, 9.9)      | 10.9 (8.6, 12.8)     |
|          | Cold | 69.8 (66.5, 72.3) | 65.5 (61.4, 68.6)   | 58.4 (52.0, 65.1)    |
|          | Net  | -                 | -2.6 (-4.3, -1.4)   | -7.3 (-11.4, -3.3)   |
| Shiga    | Heat | 6.1 (4.9, 7.0)    | 8.0 (6.3, 9.4)      | 10.3 (7.7, 12.4)     |
|          | Cold | 64.0 (58.4, 67.9) | 58.9 (53.0, 63.4)   | 50.6 (43.1, 58.7)    |
|          | Net  | -                 | -3.2 (-5.5, -1.6)   | -9.1 (-13.1, -4.2)   |
| Shimane  | Heat | 5.2 (3.6, 6.6)    | 6.9 (4.7, 8.9)      | 9.3 (6.0, 12.0)      |
|          | Cold | 49.3 (38.9, 56.4) | 43.8 (33.6, 51.1)   | 35.9 (25.7, 45.5)    |

|           |      |                   |                   |                    |
|-----------|------|-------------------|-------------------|--------------------|
| Shizuoka  | Net  | -                 | -3.8 (-6.2, -1.9) | -9.3 (-13.7, -4.7) |
|           | Heat | 6.4 (4.9, 7.5)    | 8.6 (6.4, 10.4)   | 11.2 (7.8, 13.8)   |
|           | Cold | 67.8 (63.6, 70.8) | 62.7 (57.6, 66.6) | 54.2 (46.5, 62.4)  |
| Tochigi   | Net  | -                 | -2.9 (-5.3, -1.2) | -8.7 (-14.2, -3.4) |
|           | Heat | 4.2 (3.3, 5.0)    | 5.5 (4.2, 6.7)    | 7.4 (5.3, 9.1)     |
|           | Cold | 72.2 (67.2, 75.6) | 68.2 (62.7, 72.0) | 61.2 (53.9, 68.3)  |
| Tokushima | Net  | -                 | -2.7 (-4.3, -1.5) | -7.8 (-11.5, -3.8) |
|           | Heat | 5.3 (4.0, 6.5)    | 7.0 (5.2, 8.7)    | 9.4 (6.6, 12.0)    |
|           | Cold | 59.9 (52.5, 65.2) | 54.6 (46.9, 60.3) | 46.3 (37.2, 55.5)  |
| Tokyo     | Net  | -                 | -3.6 (-5.9, -1.8) | -9.4 (-14.2, -4.4) |
|           | Heat | 6.3 (3.3, 8.2)    | 8.0 (3.9, 10.7)   | 10.3 (4.1, 14.0)   |
|           | Cold | 68.3 (56.1, 73.6) | 63.9 (52.7, 69.6) | 56.1 (43.9, 65.4)  |
| Tottori   | Net  | -                 | -2.6 (-5.4, -0.3) | -8.1 (-14.8, -2.9) |
|           | Heat | 6.3 (4.9, 7.5)    | 8.2 (6.2, 9.9)    | 10.8 (7.8, 13.2)   |
|           | Cold | 58.5 (50.7, 63.6) | 52.8 (45.0, 58.2) | 44.1 (35.1, 53.2)  |
| Toyama    | Net  | -                 | -3.9 (-5.7, -2.2) | -9.9 (-13.9, -5.0) |
|           | Heat | 6.3 (5.3, 7.2)    | 8.1 (6.6, 9.6)    | 10.4 (8.0, 12.5)   |
|           | Cold | 65.6 (60.6, 69.3) | 60.4 (54.6, 64.7) | 52.0 (44.7, 59.9)  |
| Wakayama  | Net  | -                 | -3.6 (-5.5, -2.0) | -9.5 (-13.3, -5.0) |
|           | Heat | 4.2 (3.0, 5.4)    | 5.7 (3.9, 7.2)    | 7.6 (5.0, 9.9)     |
|           | Cold | 56.6 (45.5, 64.1) | 51.3 (40.3, 59.0) | 43.3 (32.1, 53.7)  |
| Yamagata  | Net  | -                 | -3.9 (-6.2, -2.2) | -9.9 (-14.3, -4.8) |
|           | Heat | 5.2 (3.9, 6.2)    | 6.7 (4.9, 8.2)    | 8.7 (6.2, 10.8)    |
|           | Cold | 65.1 (57.7, 69.8) | 60.6 (53.0, 65.7) | 53.6 (45.1, 60.9)  |
| Yamaguchi | Net  | -                 | -3.1 (-4.8, -1.8) | -8.0 (-11.2, -4.3) |
|           | Heat | 6.4 (5.3, 7.3)    | 8.3 (6.8, 9.7)    | 11.0 (8.4, 12.9)   |
|           | Cold | 64.6 (59.2, 68.5) | 59.0 (52.9, 63.9) | 50.5 (42.4, 59.2)  |
| Yamanashi | Net  | -                 | -3.7 (-6.1, -1.7) | -9.6 (-14.4, -4.4) |
|           | Heat | 5.0 (3.8, 6.1)    | 6.5 (4.8, 8.0)    | 8.5 (6.1, 10.7)    |
|           | Cold | 57.1 (47.8, 63.7) | 52.5 (43.3, 59.3) | 45.5 (35.7, 54.8)  |
|           | Net  | -                 | -3.1 (-4.8, -1.8) | -8.1 (-11.9, -3.8) |

---

**Table S6.** Prefecture-specific attributable fractions (95% eCI) for infectious gastroenteritis in 2010–2019. Attributable fractions were computed as total and as separate components for cold and heat.

| Prefecture | Minimum morbidity percentile | Minimum morbidity temperature (°C) | Total (%)         | Cold (%)          | Heat (%)       |
|------------|------------------------------|------------------------------------|-------------------|-------------------|----------------|
| Hokkaido   | 75th                         | 18.2                               | 61.9 (47.5, 70.0) | 57.5 (44.0, 64.8) | 4.4 (1.6, 6.6) |
| Aomori     | 75th                         | 18.8                               | 74.2 (64.8, 79.6) | 70.2 (61.5, 75.2) | 3.9 (2.3, 5.3) |
| Iwate      | 73rd                         | 18.6                               | 73.7 (66.3, 78.3) | 68.0 (61.1, 72.1) | 5.8 (4.1, 7.1) |
| Miyagi     | 73rd                         | 19.7                               | 73.8 (68.3, 77.5) | 68.6 (63.7, 72.0) | 5.3 (3.9, 6.5) |
| Akita      | 72nd                         | 19.7                               | 73.8 (67.5, 78.0) | 68.1 (62.3, 71.9) | 5.7 (4.3, 6.9) |
| Yamagata   | 73rd                         | 20.3                               | 70.3 (62.3, 75.5) | 65.1 (57.7, 69.8) | 5.2 (3.9, 6.2) |
| Fukushima  | 72nd                         | 20.4                               | 72.6 (66.6, 76.6) | 67.1 (61.5, 70.8) | 5.5 (4.4, 6.5) |
| Ibaraki    | 74th                         | 20.9                               | 71.1 (64.7, 75.4) | 66.7 (61.0, 70.5) | 4.5 (3.2, 5.6) |
| Tochigi    | 73rd                         | 21.2                               | 76.4 (70.9, 80.1) | 72.2 (67.2, 75.6) | 4.2 (3.3, 5.0) |
| Gunma      | 72nd                         | 21.6                               | 74.0 (69.7, 77.1) | 67.8 (63.8, 70.7) | 6.2 (5.2, 7.1) |
| Saitama    | 72nd                         | 22.0                               | 76.6 (72.9, 79.3) | 69.8 (66.5, 72.3) | 6.8 (5.8, 7.6) |
| Chiba      | 73rd                         | 22.2                               | 77.7 (73.8, 80.5) | 71.7 (68.3, 74.1) | 6.1 (5.0, 7.0) |
| Tokyo      | 74th                         | 23.0                               | 74.5 (61.1, 80.5) | 68.3 (56.1, 73.6) | 6.3 (3.3, 8.2) |
| Kanagawa   | 74th                         | 22.4                               | 76.9 (72.1, 80.3) | 71.2 (66.9, 74.1) | 5.8 (4.5, 6.8) |
| Niigata    | 71st                         | 21.0                               | 73.3 (67.4, 77.3) | 68.6 (63.2, 72.4) | 4.7 (3.8, 5.4) |
| Toyama     | 71st                         | 21.0                               | 72.0 (66.4, 75.9) | 65.6 (60.6, 69.3) | 6.3 (5.3, 7.2) |
| Ishikawa   | 72nd                         | 21.5                               | 66.4 (58.3, 71.9) | 61.6 (54.1, 66.8) | 4.8 (3.8, 5.6) |
| Fukui      | 71st                         | 21.6                               | 65.1 (57.6, 70.4) | 59.5 (52.6, 64.3) | 5.6 (4.4, 6.6) |
| Yamanashi  | 70th                         | 21.4                               | 62.1 (52.3, 69.1) | 57.1 (47.8, 63.7) | 5.0 (3.8, 6.1) |
| Nagano     | 72nd                         | 20.2                               | 65.4 (57.4, 70.8) | 59.3 (51.9, 64.6) | 6.0 (4.7, 7.2) |
| Gifu       | 69th                         | 22.5                               | 65.7 (56.4, 71.9) | 59.6 (50.6, 65.6) | 6.1 (4.7, 7.2) |
| Shizuoka   | 73rd                         | 22.9                               | 74.2 (69.3, 77.6) | 67.8 (63.6, 70.8) | 6.4 (4.9, 7.5) |
| Aichi      | 70th                         | 22.7                               | 72.0 (65.1, 76.4) | 65.2 (59.1, 69.3) | 6.8 (5.5, 7.8) |
| Mie        | 72nd                         | 22.7                               | 70.9 (65.5, 75.0) | 64.7 (59.6, 68.6) | 6.2 (5.1, 7.1) |
| Shiga      | 73rd                         | 22.2                               | 70.0 (63.9, 74.4) | 64.0 (58.4, 67.9) | 6.1 (4.9, 7.0) |
| Kyoto      | 70th                         | 22.6                               | 63.3 (55.4, 69.0) | 56.8 (49.4, 62.2) | 6.5 (5.3, 7.6) |

|           |      |      |      |               |      |              |      |              |
|-----------|------|------|------|---------------|------|--------------|------|--------------|
| Osaka     | 70th | 23.1 | 63.6 | (54.7, 69.7)  | 57.1 | (48.7, 62.9) | 6.4  | (4.9, 7.7)   |
| Hyogo     | 71st | 23.3 | 57.9 | (47.8, 64.9)  | 52.8 | (43.2, 59.2) | 5.2  | (3.8, 6.3)   |
| Nara      | 72nd | 21.9 | 70.3 | (63.3, 75.0)  | 64.8 | (58.6, 69.1) | 5.4  | (4.2, 6.4)   |
| Wakayama  | 73rd | 23.3 | 60.8 | (49.1, 68.8)  | 56.6 | (45.5, 64.1) | 4.2  | (3.0, 5.4)   |
| Tottori   | 73rd | 21.7 | 64.8 | (56.2, 70.4)  | 58.5 | (50.7, 63.6) | 6.3  | (4.9, 7.5)   |
| Shimane   | 72nd | 21.3 | 54.5 | (43.2, 62.1)  | 49.3 | (38.9, 56.4) | 5.2  | (3.6, 6.6)   |
| Okayama   | 70th | 22.8 | 62.1 | (54.7, 67.3)  | 55.8 | (49.1, 60.7) | 6.3  | (5.1, 7.3)   |
| Hiroshima | 69th | 22.4 | 62.5 | (53.2, 68.6)  | 56.8 | (48.2, 62.6) | 5.6  | (4.4, 6.7)   |
| Yamaguchi | 71st | 22.1 | 71.0 | (65.1, 75.1)  | 64.6 | (59.2, 68.5) | 6.4  | (5.3, 7.3)   |
| Tokushima | 72nd | 23.0 | 65.2 | (57.1, 70.9)  | 59.9 | (52.5, 65.2) | 5.3  | (4.0, 6.5)   |
| Kagawa    | 70th | 22.7 | 62.1 | (52.0, 68.6)  | 56.0 | (46.6, 62.2) | 6.1  | (4.7, 7.3)   |
| Ehime     | 73rd | 23.1 | 71.2 | (65.0, 75.6)  | 64.8 | (59.1, 68.7) | 6.5  | (5.3, 7.4)   |
| Kochi     | 71st | 23.0 | 67.8 | (58.9, 73.6)  | 63.1 | (54.9, 68.5) | 4.7  | (3.5, 5.6)   |
| Fukuoka   | 72nd | 23.1 | 58.1 | (48.2, 65.3)  | 52.7 | (43.4, 59.6) | 5.5  | (4.1, 6.7)   |
| Saga      | 69th | 22.7 | 71.9 | (62.6, 77.8)  | 67.7 | (58.9, 73.3) | 4.2  | (3.4, 4.9)   |
| Nagasaki  | 73rd | 23.4 | 70.1 | (62.0, 75.6)  | 65.3 | (57.8, 70.3) | 4.9  | (3.8, 5.7)   |
| Kumamoto  | 69th | 23.0 | 58.3 | (47.9, 65.2)  | 52.4 | (42.6, 58.9) | 5.8  | (4.4, 7.1)   |
| Oita      | 72nd | 22.6 | 56.8 | (46.5, 63.7)  | 51.6 | (42.3, 57.9) | 5.2  | (3.6, 6.6)   |
| Miyazaki  | 73rd | 23.4 | 52.2 | (39.7, 60.4)  | 48.8 | (37.4, 56.5) | 3.4  | (1.8, 4.7)   |
| Kagoshima | 71st | 23.9 | 66.2 | (58.6, 71.4)  | 59.7 | (52.6, 64.6) | 6.5  | (5.2, 7.7)   |
| Okinawa   | 99th | 30.0 | 37.4 | (-10.8, 54.6) | 41.3 | (-1.8, 60.1) | -3.9 | (-26.5, 2.8) |
| Total     | 72nd |      | 68.3 | (62.7, 71.5)  | 62.5 | (57.4, 65.6) | 5.7  | (4.4, 6.8)   |

**Table S7.** Sensitivity analysis using exposure-response curves calculated with uniform daily outcome counts within each week: Prefecture-specific attributable fractions (95% eCI) for infectious gastroenteritis in 2010–2019. Attributable fractions were computed as total and as separate components for cold and heat.

| Prefecture | Minimum morbidity percentile | Minimum morbidity temperature (°C) | Total (%)         | Cold (%)          | Heat (%)       |
|------------|------------------------------|------------------------------------|-------------------|-------------------|----------------|
| Hokkaido   | 69th                         | 16.3                               | 57.1 (50.7, 61.4) | 51.7 (45.4, 56.3) | 5.4 (3.4, 7.3) |
| Aomori     | 75th                         | 18.6                               | 66.3 (60.0, 70.8) | 64.1 (57.4, 69.1) | 2.2 (1.1, 3.3) |
| Iwate      | 70th                         | 17.7                               | 67.3 (62.2, 70.7) | 62.3 (57.3, 66.3) | 5.0 (3.2, 6.7) |
| Miyagi     | 70th                         | 18.8                               | 64.6 (60.4, 67.7) | 60.0 (55.5, 63.6) | 4.7 (3.3, 6.0) |
| Akita      | 68th                         | 18.4                               | 67.3 (63.4, 70.1) | 60.9 (56.7, 64.3) | 6.4 (4.7, 7.8) |
| Yamagata   | 70th                         | 18.9                               | 64.8 (60.6, 67.6) | 60.0 (55.7, 63.3) | 4.7 (3.4, 6.1) |
| Fukushima  | 74th                         | 20.9                               | 69.4 (66.3, 71.8) | 66.3 (63.0, 69.2) | 3.1 (2.1, 4.1) |
| Ibaraki    | 72nd                         | 20.3                               | 64.3 (58.4, 68.1) | 60.2 (54.4, 64.2) | 4.1 (2.7, 5.4) |
| Tochigi    | 69th                         | 20.3                               | 68.4 (63.7, 71.6) | 64.2 (59.5, 67.6) | 4.2 (3.2, 5.3) |
| Gunma      | 69th                         | 20.9                               | 67.6 (64.3, 70.0) | 61.4 (58.1, 63.9) | 6.2 (5.0, 7.4) |
| Saitama    | 70th                         | 21.5                               | 70.4 (67.4, 72.7) | 64.5 (61.5, 66.9) | 5.9 (4.7, 7.2) |
| Chiba      | 71st                         | 21.7                               | 68.4 (64.6, 71.0) | 63.3 (59.4, 66.2) | 5.1 (4.0, 6.2) |
| Tokyo      | 72nd                         | 22.4                               | 69.8 (60.3, 74.4) | 64.9 (56.5, 69.5) | 4.8 (2.3, 7.0) |
| Kanagawa   | 72nd                         | 21.9                               | 72.0 (68.7, 74.3) | 66.6 (63.3, 69.1) | 5.4 (4.2, 6.7) |
| Niigata    | 69th                         | 20.3                               | 68.8 (66.0, 71.1) | 64.8 (61.7, 67.8) | 4.0 (2.9, 5.0) |
| Toyama     | 66th                         | 20.0                               | 63.1 (58.9, 66.1) | 55.5 (51.2, 58.9) | 7.6 (6.3, 8.8) |
| Ishikawa   | 66th                         | 20.0                               | 56.9 (51.9, 60.6) | 51.2 (46.0, 55.3) | 5.7 (4.5, 6.8) |
| Fukui      | 70th                         | 21.2                               | 61.2 (57.8, 63.8) | 56.2 (52.5, 59.2) | 5.0 (3.9, 6.2) |
| Yamanashi  | 66th                         | 20.4                               | 51.6 (45.5, 56.2) | 47.0 (40.7, 51.8) | 4.6 (3.2, 6.0) |
| Nagano     | 67th                         | 18.6                               | 53.4 (46.9, 57.9) | 48.0 (41.6, 52.9) | 5.4 (3.8, 6.9) |
| Gifu       | 68th                         | 22.1                               | 68.7 (65.3, 71.1) | 62.4 (58.9, 65.1) | 6.3 (5.0, 7.7) |
| Shizuoka   | 72nd                         | 22.5                               | 70.2 (67.5, 72.3) | 64.7 (61.9, 66.9) | 5.5 (4.2, 6.9) |
| Aichi      | 69th                         | 22.2                               | 68.0 (63.8, 70.8) | 62.2 (58.1, 65.2) | 5.8 (4.5, 7.3) |
| Mie        | 70th                         | 22.1                               | 68.1 (64.9, 70.3) | 62.0 (58.8, 64.6) | 6.1 (4.8, 7.3) |

|           |      |      |      |              |      |              |      |             |
|-----------|------|------|------|--------------|------|--------------|------|-------------|
| Shiga     | 71st | 21.6 | 62.6 | (58.9, 65.4) | 58.3 | (54.4, 61.5) | 4.3  | (3.1, 5.5)  |
| Kyoto     | 66th | 21.4 | 57.2 | (53.0, 60.5) | 50.3 | (45.8, 53.7) | 7.0  | (5.5, 8.5)  |
| Osaka     | 69th | 22.7 | 58.8 | (53.1, 62.9) | 52.5 | (46.9, 56.8) | 6.4  | (4.9, 7.9)  |
| Hyogo     | 70th | 23.0 | 51.6 | (45.6, 56.4) | 47.6 | (41.3, 52.6) | 4.0  | (2.5, 5.5)  |
| Nara      | 68th | 20.7 | 61.8 | (56.1, 65.8) | 55.9 | (50.0, 60.2) | 5.9  | (4.6, 7.3)  |
| Wakayama  | 74th | 23.6 | 65.7 | (61.7, 68.8) | 62.2 | (57.9, 65.7) | 3.4  | (2.3, 4.5)  |
| Tottori   | 73rd | 21.9 | 62.9 | (59.8, 65.4) | 59.9 | (56.7, 62.7) | 3.0  | (1.5, 4.3)  |
| Shimane   | 68th | 20.4 | 48.4 | (42.3, 52.7) | 42.4 | (36.3, 47.3) | 6.0  | (4.5, 7.5)  |
| Okayama   | 66th | 21.7 | 60.0 | (56.4, 62.8) | 51.9 | (48.1, 55.0) | 8.1  | (6.9, 9.5)  |
| Hiroshima | 68th | 22.1 | 62.0 | (57.8, 65.2) | 56.7 | (52.3, 60.3) | 5.3  | (4.0, 6.6)  |
| Yamaguchi | 69th | 21.6 | 69.6 | (67.4, 71.4) | 63.8 | (61.2, 66.5) | 5.8  | (4.4, 6.9)  |
| Tokushima | 72nd | 23.1 | 58.6 | (53.4, 62.6) | 55.5 | (50.1, 60.0) | 3.1  | (1.8, 4.4)  |
| Kagawa    | 68th | 22.2 | 61.8 | (57.8, 64.7) | 55.8 | (51.8, 59.1) | 6.0  | (4.6, 7.4)  |
| Ehime     | 71st | 22.7 | 68.0 | (65.4, 70.0) | 62.6 | (59.7, 65.0) | 5.4  | (4.2, 6.7)  |
| Kochi     | 70th | 22.9 | 63.4 | (58.5, 67.0) | 59.0 | (53.9, 63.2) | 4.3  | (3.1, 5.5)  |
| Fukuoka   | 70th | 22.7 | 58.2 | (53.5, 62.0) | 53.8 | (49.0, 57.6) | 4.5  | (3.1, 5.8)  |
| Saga      | 65th | 21.6 | 68.6 | (64.2, 71.7) | 65.5 | (61.4, 68.7) | 3.1  | (0.4, 4.6)  |
| Nagasaki  | 71st | 22.8 | 67.8 | (64.1, 70.5) | 64.1 | (60.1, 67.3) | 3.7  | (2.4, 4.9)  |
| Kumamoto  | 70th | 23.3 | 58.9 | (54.6, 62.3) | 54.3 | (49.8, 58.0) | 4.7  | (3.5, 5.9)  |
| Oita      | 70th | 22.2 | 52.8 | (48.0, 56.6) | 48.5 | (43.6, 52.4) | 4.3  | (2.7, 5.9)  |
| Miyazaki  | 71st | 22.9 | 47.2 | (40.7, 51.9) | 45.1 | (38.8, 50.0) | 2.2  | (0.6, 3.6)  |
| Kagoshima | 72nd | 24.4 | 63.7 | (59.5, 66.9) | 59.4 | (55.1, 62.9) | 4.3  | (2.8, 5.6)  |
| Okinawa   | 99th | 30.2 | 36.6 | (-3.6, 58.3) | 36.7 | (-3.4, 58.8) | -0.2 | (-0.7, 0.2) |
| Total     | 70th |      | 63.6 | (60.0, 66.0) | 58.4 | (54.6, 61.2) | 5.2  | (4.0, 6.3)  |

**Table S8.** Sensitivity analysis with exposure-response curves calculated using weekly data, and a) calibrating the projected time series of daily mean temperature using the observed distribution of daily mean temperature, and b) projecting the time series of daily outcome using uniform distribution of events within a week: Prefecture-specific attributable fractions (95% eCI) for infectious gastroenteritis in 2010–2019. Attributable fractions were computed as total and as separate components for cold and heat.

| Prefecture | Minimum morbidity percentile | Minimum morbidity temperature (°C) | Total (%)         | Cold (%)          | Heat (%)       |
|------------|------------------------------|------------------------------------|-------------------|-------------------|----------------|
| Hokkaido   | 75th                         | 18.2                               | 57.2 (44.4, 64.3) | 55.1 (42.5, 62.2) | 2.1 (0.4, 3.8) |
| Aomori     | 75th                         | 18.8                               | 70.7 (62.1, 75.8) | 68.5 (60.2, 73.7) | 2.2 (1.1, 3.3) |
| Iwate      | 73rd                         | 18.6                               | 69.6 (62.9, 73.7) | 65.9 (59.4, 70.1) | 3.8 (2.2, 5.2) |
| Miyagi     | 73rd                         | 19.7                               | 70.3 (65.5, 73.7) | 66.9 (62.3, 70.8) | 3.4 (2.2, 4.6) |
| Akita      | 72nd                         | 19.7                               | 69.7 (64.1, 73.4) | 65.9 (60.5, 69.8) | 3.8 (2.5, 5.1) |
| Yamagata   | 73rd                         | 20.3                               | 66.2 (59.1, 70.7) | 63.0 (56.1, 67.3) | 3.3 (2.2, 4.4) |
| Fukushima  | 72nd                         | 20.4                               | 69.3 (63.8, 72.8) | 65.5 (60.4, 69.3) | 3.7 (2.5, 4.9) |
| Ibaraki    | 74th                         | 20.9                               | 68.8 (63.1, 72.6) | 65.6 (60.2, 69.3) | 3.2 (2.1, 4.3) |
| Tochigi    | 73rd                         | 21.2                               | 74.0 (69.0, 77.2) | 71.1 (66.3, 74.2) | 2.9 (2.1, 3.8) |
| Gunma      | 72nd                         | 21.6                               | 71.4 (67.6, 74.2) | 66.6 (63.0, 69.2) | 4.8 (3.8, 6.0) |
| Saitama    | 72nd                         | 22.0                               | 73.3 (70.0, 75.8) | 68.3 (65.3, 70.7) | 5.0 (4.0, 6.1) |
| Chiba      | 73rd                         | 22.2                               | 74.3 (70.8, 76.7) | 70.1 (66.9, 72.6) | 4.2 (3.2, 5.2) |
| Tokyo      | 74th                         | 23.0                               | 71.7 (59.9, 76.8) | 67.2 (56.2, 72.2) | 4.4 (2.1, 6.4) |
| Kanagawa   | 74th                         | 22.4                               | 73.8 (69.7, 76.6) | 69.8 (65.9, 72.4) | 4.0 (2.9, 5.2) |
| Niigata    | 71st                         | 21.0                               | 69.4 (64.2, 73.1) | 66.5 (61.4, 70.4) | 2.9 (2.0, 3.7) |
| Toyama     | 71st                         | 21.0                               | 68.7 (63.7, 72.0) | 63.7 (59.0, 66.9) | 5.0 (3.9, 6.1) |
| Ishikawa   | 72nd                         | 21.5                               | 63.6 (56.3, 68.5) | 60.2 (53.1, 65.1) | 3.5 (2.5, 4.4) |
| Fukui      | 71st                         | 21.6                               | 62.3 (55.6, 66.7) | 58.1 (51.7, 62.5) | 4.2 (3.0, 5.3) |
| Yamanashi  | 70th                         | 21.4                               | 59.8 (50.8, 66.2) | 56.3 (47.6, 62.5) | 3.5 (2.3, 4.8) |
| Nagano     | 72nd                         | 20.2                               | 61.0 (54.0, 65.9) | 57.3 (50.4, 62.2) | 3.7 (2.4, 4.9) |
| Gifu       | 69th                         | 22.5                               | 63.3 (54.9, 68.8) | 58.7 (50.4, 64.2) | 4.7 (3.3, 6.1) |
| Shizuoka   | 73rd                         | 22.9                               | 70.6 (66.3, 73.5) | 66.1 (62.1, 68.9) | 4.5 (3.3, 5.7) |



|           |      |      |      |              |      |              |      |             |
|-----------|------|------|------|--------------|------|--------------|------|-------------|
| Aichi     | 70th | 22.7 | 69.0 | (62.9, 72.8) | 63.8 | (58.0, 67.6) | 5.1  | (3.8, 6.4)  |
| Mie       | 72nd | 22.7 | 68.1 | (63.2, 71.6) | 63.3 | (58.7, 66.8) | 4.7  | (3.6, 5.9)  |
| Shiga     | 73rd | 22.2 | 66.6 | (61.2, 70.3) | 62.4 | (57.4, 66.1) | 4.1  | (3.1, 5.2)  |
| Kyoto     | 70th | 22.6 | 60.4 | (53.4, 65.3) | 55.5 | (48.6, 60.4) | 4.9  | (3.6, 6.3)  |
| Osaka     | 70th | 23.1 | 60.7 | (52.8, 66.0) | 55.9 | (48.3, 61.2) | 4.8  | (3.3, 6.4)  |
| Hyogo     | 71st | 23.3 | 55.0 | (45.7, 61.1) | 51.6 | (42.7, 57.7) | 3.5  | (2.2, 4.7)  |
| Nara      | 72nd | 21.9 | 66.6 | (60.5, 70.6) | 63.1 | (57.3, 67.1) | 3.5  | (2.5, 4.6)  |
| Wakayama  | 73rd | 23.3 | 58.3 | (47.4, 65.6) | 55.5 | (45.0, 62.6) | 2.8  | (1.7, 3.9)  |
| Tottori   | 73rd | 21.7 | 61.3 | (53.5, 66.3) | 56.5 | (49.3, 61.4) | 4.7  | (3.4, 6.0)  |
| Shimane   | 72nd | 21.3 | 52.1 | (41.7, 58.8) | 48.1 | (38.3, 54.7) | 3.9  | (2.4, 5.4)  |
| Okayama   | 70th | 22.8 | 59.7 | (53.2, 64.2) | 54.7 | (48.4, 59.2) | 5.0  | (3.8, 6.3)  |
| Hiroshima | 69th | 22.4 | 60.0 | (51.8, 65.4) | 55.7 | (47.6, 61.1) | 4.3  | (3.0, 5.6)  |
| Yamaguchi | 71st | 22.1 | 68.1 | (62.8, 71.7) | 63.4 | (58.3, 67.3) | 4.7  | (3.4, 5.8)  |
| Tokushima | 72nd | 23.0 | 62.6 | (55.3, 67.8) | 58.8 | (51.9, 63.8) | 3.8  | (2.6, 5.0)  |
| Kagawa    | 70th | 22.7 | 59.6 | (50.4, 65.3) | 54.8 | (45.9, 60.5) | 4.8  | (3.3, 6.2)  |
| Ehime     | 73rd | 23.1 | 67.6 | (62.0, 71.2) | 63.1 | (57.8, 66.7) | 4.5  | (3.4, 5.7)  |
| Kochi     | 71st | 23.0 | 65.2 | (57.0, 70.3) | 62.0 | (54.2, 67.0) | 3.2  | (2.1, 4.2)  |
| Fukuoka   | 72nd | 23.1 | 56.2 | (46.9, 62.6) | 52.2 | (43.3, 58.7) | 4.0  | (2.6, 5.2)  |
| Saga      | 69th | 22.7 | 70.1 | (61.5, 75.2) | 66.9 | (58.5, 72.0) | 3.2  | (2.3, 3.9)  |
| Nagasaki  | 73rd | 23.4 | 67.4 | (60.0, 72.3) | 64.2 | (57.1, 68.9) | 3.2  | (2.3, 4.2)  |
| Kumamoto  | 69th | 23.0 | 55.6 | (46.2, 61.7) | 51.3 | (42.0, 57.4) | 4.3  | (2.9, 5.6)  |
| Oita      | 72nd | 22.6 | 54.4 | (45.1, 60.4) | 50.5 | (41.7, 56.4) | 3.8  | (2.3, 5.3)  |
| Miyazaki  | 73rd | 23.4 | 50.1 | (38.7, 57.6) | 47.6 | (36.7, 55.0) | 2.5  | (1.2, 3.7)  |
| Kagoshima | 71st | 23.9 | 62.8 | (55.9, 67.4) | 58.0 | (51.3, 62.6) | 4.8  | (3.4, 6.1)  |
| Okinawa   | 99th | 30.0 | 41.5 | (-0.3, 60.1) | 41.8 | (-0.2, 60.8) | -0.3 | (-1.1, 0.3) |
| Total     | 72nd |      | 65.3 | (60.4, 68.2) | 61.2 | (56.4, 64.1) | 4.1  | (2.8, 5.3)  |

**Table S9.** Sensitivity analysis using exposure-response curves calculated with uniform daily outcome counts within each week: Heat-related, cold-related, and net excess morbidity in diarrhea (%) with 95% empirical confidence interval (eCI) by period under four climate change scenarios (RCP2.6, RCP4.5, RCP6.0, and RCP8.5) in Japan. Heat-related and cold-related morbidity were estimated using a two-stage time series regression model with quasi-Poisson family (Gasparrini et al. 2017). Estimates are presented as GCM-ensemble average decadal fractions. GCM=general circulation model; RCP=representative concentration pathway.

| Scenario | Effect | Period    |              |           |              |           |               |
|----------|--------|-----------|--------------|-----------|--------------|-----------|---------------|
|          |        | 2010–2019 |              | 2050–2059 |              | 2090–2099 |               |
| RCP2.6   | Heat   | 5.1       | (3.8, 6.4)   | 5.9       | (4.4, 7.7)   | 5.7       | (4.1, 7.1)    |
|          | Cold   | 58.5      | (54.6, 61.5) | 56.8      | (52.6, 60.1) | 57.7      | (53.8, 61.0)  |
|          | Net    | -         |              | -0.9      | (-2.0, -0.1) | -0.2      | (-1.5, 0.7)   |
| RCP4.5   | Heat   | 4.9       | (3.7, 6.0)   | 6.4       | (4.8, 7.8)   | 7.0       | (5.2, 8.6)    |
|          | Cold   | 58.6      | (54.7, 61.7) | 56.0      | (51.9, 59.2) | 54.3      | (49.6, 58.5)  |
|          | Net    | -         |              | -1.2      | (-3.0, 0.4)  | -2.3      | (-4.5, -0.3)  |
| RCP6.0   | Heat   | 4.9       | (3.7, 6.0)   | 6.2       | (4.6, 7.8)   | 7.8       | (5.8, 9.7)    |
|          | Cold   | 58.6      | (54.6, 61.7) | 56.4      | (52.0, 59.9) | 52.4      | (46.9, 57.7)  |
|          | Net    | -         |              | -0.9      | (-2.6, 0.5)  | -3.3      | (-6.6, 0.5)   |
| RCP8.5   | Heat   | 5.1       | (3.8, 6.4)   | 7.0       | (5.3, 8.5)   | 9.6       | (6.4, 12.1)   |
|          | Cold   | 58.5      | (54.5, 61.5) | 54.1      | (49.5, 57.5) | 47.6      | (41.9, 53.9)  |
|          | Net    | -         |              | -2.5      | (-4.5, -1.2) | -6.4      | (-11.2, -2.7) |

**Table S10.** Sensitivity analysis with exposure-response curves calculated using weekly data, and a) calibrating the projected time series of daily mean temperature using the observed distribution of daily mean temperature, and b) projecting the time series of daily outcome using uniform distribution of events within a week: Heat-related, cold-related, and net excess morbidity in diarrhea (%) with 95% empirical confidence interval (eCI) by period under four climate change scenarios (RCP2.6, RCP4.5, RCP6.0, and RCP8.5) in Japan. Heat-related and cold-related morbidity were estimated using a two-stage time series regression model with quasi-Poisson family (Gasparrini et al. 2017). Estimates are presented as GCM-ensemble average decadal fractions. GCM=general circulation model; RCP=representative concentration pathway.

| Scenario | Effect | Period    |              |           |              |           |              |
|----------|--------|-----------|--------------|-----------|--------------|-----------|--------------|
|          |        | 2010–2019 |              | 2050–2059 |              | 2090–2099 |              |
| RCP2.6   | Heat   | 4.1       | (2.9, 5.3)   | 5.0       | (3.5, 6.9)   | 4.7       | (3.2, 6.1)   |
|          | Cold   | 61.2      | (56.3, 64.0) | 59.1      | (54.1, 62.7) | 60.0      | (55.2, 63.4) |
|          | Net    | -         |              | -1.2      | (-2.2, -0.2) | -0.5      | (-1.9, 0.8)  |
| RCP4.5   | Heat   | 3.9       | (2.7, 4.9)   | 5.4       | (3.9, 6.9)   | 6.0       | (4.2, 7.7)   |
|          | Cold   | 61.3      | (56.5, 64.2) | 58.1      | (53.2, 61.4) | 56.3      | (50.8, 60.7) |
|          | Net    | -         |              | -1.7      | (-3.4, -0.3) | -2.8      | (-4.8, -0.7) |
| RCP6.0   | Heat   | 3.9       | (2.7, 4.9)   | 5.1       | (3.6, 6.7)   | 7.0       | (5.0, 9.3)   |
|          | Cold   | 61.4      | (56.6, 64.3) | 58.6      | (53.3, 62.2) | 54.3      | (48.1, 59.8) |
|          | Net    | -         |              | -1.6      | (-3.3, -0.2) | -4.0      | (-7.0, -1.0) |
| RCP8.5   | Heat   | 4.1       | (2.8, 5.3)   | 6.1       | (4.4, 7.7)   | 9.5       | (6.2, 12.3)  |
|          | Cold   | 61.2      | (56.4, 64.1) | 56.1      | (50.8, 59.7) | 49.4      | (42.8, 56.0) |
|          | Net    | -         |              | -3.1      | (-4.9, -1.9) | -6.5      | (-9.8, -3.4) |

## **References**

Gasparri A, Guo Y, Sera F, Vicedo-Cabrera AM, Huber V, Tong S, et al. 2017. Projections of temperature-related excess mortality under climate change scenarios. *Lancet Planet Health* 1:e360-e367.

Vicedo-Cabrera AM, Sera F, Gasparri A. 2019. Hands-on tutorial on a modeling framework for projections of climate change impacts on health. *Epidemiology* 30:321-329.
